# Supplementary material for: Global Dietary Database 2017: data availability and gaps on 54 major foods, beverages and nutrients among 5.6 million children and adults from 1220 surveys worldwide
Source: PubMed Central journal article supplement (PMC7871251; doi:10.1136/bmjgh-2020-003585), 2021-02-05
Supplement: bmjgh-2020-003585supp001.pdf [file bmjgh-2020-003585supp001.pdf]

## Supplemental Materials

Supplement to:

Miller V, Singh GM, Onopa J, Reedy J, Shi P, Zhang J, Tahira A, Shulkin Morris ML, Marsden DM, Kranz S, Stoyell S, Webb P, Micha R, Mozaffarian D, Global Dietary Database

### Contents

#### Appendix S1: Scope of data collection

Text S1. Description of geographic, demographic, and dietary scope of data collection

Table S1. Countries, regions and super-regions included in GDD 2017

Table S2. Survey- and participant-level characteristics included in GDD 2017

#### Appendix S2: Data identification and retrieval

Text S2. Overview of data search, identification, and retrieval process.

Table S3. Systematic review search terms for Medline, Web of Science, LILACS, African Index Medicus

#### Appendix S3: Data assessment and analysis

Text S3. Overview of data assessment, categorization, standardization, and analysis

Table S4. Total daily energy values by age

Table S5. Common categories of intake and their servings per day conversions

Table S6. Common weight conversions

Table S7. Standard serving sizes for foods and beverages

Table S8. Reference Adult Male Equivalents

Table S9. Group mean plausibility cutoffs for foods and beverages

Table S10. Individual mean plausibility cutoffs for foods and beverages

Table S11. Group mean plausibility cutoffs for macronutrients

Table S12. Individual mean plausibility cutoffs for macronutrients

Table S13. Group mean plausibility cutoffs for micronutrients

Table S14. Individual mean plausibility cutoffs for micronutrients

Text S4. Global population represented

Table S15. Characteristics of 1,220 dietary surveys in the GDD 2017 by dietary assessment method

Table S16. Frequency (%) of dietary factors by dietary assessment method

Figure S1. Geographic density of the number of dietary surveys in the GDD 2017 by country, including surveys collected between 1980 to 1999 (panel A) and 2000 to 2015 (panel B)

#### Appendix S4: Dissemination

Table S17. Data sharing agreements for corresponding member and public surveys.

Table S18. Characteristics of surveys included in the Global Dietary Database.

**Appendix S1. Scope of data collection****Text S1. Description of geographic, demographic, and dietary scope of data collection**

Between November 2014 and May 2017, we searched for global dietary intake data on 54 dietary factors, stratified by demographic characteristics of interest. Dietary factors included in GDD 2010 (21) were those with established diet-disease relationships. Dietary factors added to GDD 2017 (33) were considered relevant to chronic disease, maternal and child health, populations not assessed in GDD 2010 (children, adolescents, pregnant/nursing women), or data-sparse geographical regions.

**Countries and time period of data collection**

We searched for surveys conducted between 1980 and 2015 which measured dietary intakes in 207 countries worldwide, which were grouped into 7 super-regions based on geographic proximity and epidemiologic characteristics (Table S1).

**Demographic characteristics**

We searched for surveys with individual-level data capturing both diet and demographic characteristics of interest, including age, sex, urban vs. rural area of residence, level of education, and pregnancy status for women (Table S2). Classifications of urban or rural residence relied on survey-specific definitions based on population density and primary sources of employment; some country- and region-level variation existed in these definitions. Educational attainment was aggregated in three levels ( $\leq 6$  years of education, 6.01-12 years, or 12.01+ years) and used as a proxy of socioeconomic status. When available, the head of household's education level was used for children who had not completed education. Individual-level or survey-level geocode data was also collected when available.

**Survey characteristics**

The sampling methodology, representativeness, sample size, and dietary assessment methods of each survey were recorded as part of the data collection process.

**Selected dietary factors of interest**

Individual-level data was collected on intake of 54 key foods and nutrients relevant to deficiency conditions, chronic disease, and overall health and diet quality.

**Table S1. Countries, regions, and super-regions included in GDD 2017**

| Region                                                     | Countries                                                                                                                                                                                                                                                                                                                                      |
|------------------------------------------------------------|------------------------------------------------------------------------------------------------------------------------------------------------------------------------------------------------------------------------------------------------------------------------------------------------------------------------------------------------|
| <b>Asia super-region (N=34)</b>                            |                                                                                                                                                                                                                                                                                                                                                |
| East Asia (N=5)                                            | China, Democratic People's Republic of Korea, Hong Kong, Macau, Taiwan                                                                                                                                                                                                                                                                         |
| Southeast Asia (N=9)                                       | Cambodia, Indonesia, Lao People's Democratic Republic, Malaysia, Myanmar, Philippines, Thailand, Timor-Leste, Viet Nam                                                                                                                                                                                                                         |
| Asia-Pacific high income (N=4)                             | Brunei Darussalam, Japan, Republic of Korea, Singapore                                                                                                                                                                                                                                                                                         |
| Oceania (N=16)                                             | American Samoa, Cook Islands, Fiji, French Polynesia, Kiribati, Marshall Islands, Micronesia, Nauru, Palau, Papua New Guinea, Samoa, Solomon Islands, Tokelau, Tonga, Tuvalu, Vanuatu                                                                                                                                                          |
| <b>Former Soviet Union super-region (N=29)</b>             |                                                                                                                                                                                                                                                                                                                                                |
| Central Asia (N=9)                                         | Armenia, Azerbaijan, Georgia, Kazakhstan, Kyrgyzstan, Mongolia, Tajikistan, Turkmenistan, Uzbekistan                                                                                                                                                                                                                                           |
| Central Europe (N=13)                                      | Albania, Bosnia and Herzegovina, Bulgaria, Croatia, Czech Republic, Hungary, Montenegro, Poland, Romania, Serbia, Slovakia, Slovenia, The former Yugoslav Republic of Macedonia                                                                                                                                                                |
| Eastern Europe (N=7)                                       | Belarus, Estonia, Latvia, Lithuania, Republic of Moldova, Russian Federation, Ukraine                                                                                                                                                                                                                                                          |
| <b>Latin America and Caribbean super-region (N=41)</b>     |                                                                                                                                                                                                                                                                                                                                                |
| Caribbean (N=24)                                           | Anguilla, Antigua and Barbuda, Bahamas, Barbados, Belize, Bermuda, British Virgin Islands, Cayman Islands, Cuba, Dominica, Dominican Republic, Grenada, Guadeloupe, Guyana, Haiti, Jamaica, Martinique, Netherlands Antilles, Puerto Rico, Saint Kitts and Nevis, Saint Lucia, Saint Vincent and the Grenadines, Suriname, Trinidad and Tobago |
| Andean Latin America (N=3)                                 | Bolivia, Ecuador, Peru                                                                                                                                                                                                                                                                                                                         |
| Central Latin America (N=9)                                | Colombia, Costa Rica, El Salvador, Guatemala, Honduras, Mexico, Nicaragua, Panama, Venezuela                                                                                                                                                                                                                                                   |
| Southern Latin America (N=3)                               | Argentina, Chile, Uruguay                                                                                                                                                                                                                                                                                                                      |
| Tropical Latin America (N=2)                               | Brazil, Paraguay                                                                                                                                                                                                                                                                                                                               |
| <b>Middle East and Northern Africa super-region (N=20)</b> |                                                                                                                                                                                                                                                                                                                                                |
| Western Europe (N=1)                                       | Israel                                                                                                                                                                                                                                                                                                                                         |
| North Africa and Middle East (N=19)                        | Algeria, Bahrain, Egypt, Iran (Islamic Republic of), Iraq, Jordan, Kuwait, Lebanon, Libyan Arab Jamahiriya, Morocco, Occupied Palestinian Territory, Oman, Qatar, Saudi Arabia, Syrian Arab Republic, Tunisia, Turkey, United Arab Emirates, Yemen                                                                                             |
| <b>South Asia super-region (N=9)</b>                       |                                                                                                                                                                                                                                                                                                                                                |
| South Asia (N=6)                                           | Afghanistan, Bangladesh, Bhutan, India, Nepal, Pakistan                                                                                                                                                                                                                                                                                        |
| Southeast Asia (N=3)                                       | Maldives, Réunion, Sri Lanka                                                                                                                                                                                                                                                                                                                   |
| <b>Sub-Saharan Africa super-region (N=48)</b>              |                                                                                                                                                                                                                                                                                                                                                |

|                                                  |                                                                                                                                                                                                                |
|--------------------------------------------------|----------------------------------------------------------------------------------------------------------------------------------------------------------------------------------------------------------------|
| Central Sub-Saharan Africa (N=6)                 | Angola, Central African Republic, Congo, Democratic Republic of Congo, Equatorial Guinea, Gabon                                                                                                                |
| Eastern Sub-Saharan Africa (N=17)                | Burundi, Comoros, Djibouti, Eritrea, Ethiopia, Kenya, Madagascar, Malawi, Mauritius, Mozambique, Rwanda, Seychelles, Somalia, Sudan, Uganda, United Republic of Tanzania, Zambia                               |
| Southern Sub-Saharan Africa (N=6)                | Botswana, Lesotho, Namibia, South Africa, Swaziland, Zimbabwe                                                                                                                                                  |
| Western Sub-Saharan Africa (N=19)                | Benin, Burkina Faso, Cameroon, Cape Verde, Chad, Côte d'Ivoire, Gambia, Ghana, Guinea, Guinea-Bissau, Liberia, Mali, Mauritania, Niger, Nigeria, São Tomé and Príncipe, Senegal, Sierra Leone, Togo            |
| <b>High-Income Countries super-region (N=26)</b> |                                                                                                                                                                                                                |
| Australasia (N=2)                                | Australia, New Zealand                                                                                                                                                                                         |
| Western Europe (N=22)                            | Andorra, Austria, Belgium, Cyprus, Denmark, Finland, France, Germany, Greece, Greenland, Iceland, Ireland, Italy, Luxembourg, Malta, Netherlands, Norway, Portugal, Spain, Sweden, Switzerland, United Kingdom |
| North America high-income (N=2)                  | Canada, United States of America                                                                                                                                                                               |

We included countries: 1) classified as United Nations (UN) Member States, 2) included in the United Nations Food and Agriculture Food Balance Sheets database, or 3) included in the World Bank Gross Domestic Product database.

Surveys were not identified for: Afghanistan, Andorra, Bermuda, Cuba, Democratic People's Republic of Korea, Djibouti, Equatorial Guinea, French Polynesia, Guadeloupe, Guinea-Bissau, Hong Kong, Macau, Martinique, Netherlands Antilles, Nicaragua, Palau, Réunion, Somalia, Turkmenistan.

Table S2. Survey- and participant-level characteristics included in GDD 2017

| Variable Name              | Variable Definition                                                                                                                                                      | Variable Coding                                                                                                                                                                                                                                                                                                               |
|----------------------------|--------------------------------------------------------------------------------------------------------------------------------------------------------------------------|-------------------------------------------------------------------------------------------------------------------------------------------------------------------------------------------------------------------------------------------------------------------------------------------------------------------------------|
| <b>Observation ID</b>      | Unique numeric identifier for each observation                                                                                                                           | A number with 10 digits or less.                                                                                                                                                                                                                                                                                              |
| <b>Start year</b>          | Year in which data collection began                                                                                                                                      | A four-digit number between 1980 and 2014                                                                                                                                                                                                                                                                                     |
| <b>End year</b>            | Year in which data collection ended                                                                                                                                      | A four-digit number between 1981 and 2015 (enter -9 if data collection has not yet ended)                                                                                                                                                                                                                                     |
| <b>Age</b>                 | This is a continuous variable that captures the age in years of the individual                                                                                           | Age in years. For all ages $\geq 2$ years, enter the year as a whole number. For children under the age of two years, enter the age as a decimal (1 month=0.08 years, 2 months=0.17, 3 months=0.25, 4 months=0.33, 5 months=0.42, 6 months=0.5, 7 months=0.58, 8 months=0.67, 9 months=0.75, 10 months=0.83, 11 months=0.92). |
| <b>Sex</b>                 | This is a dichotomous indicator variable that describes the gender of the individual.                                                                                    | 1=male<br>2=female                                                                                                                                                                                                                                                                                                            |
| <b>Residence</b>           | This is a dichotomous indicator variable that describes whether the individual lives in urban or rural area.                                                             | 1=urban<br>2=rural<br>-9=information not available                                                                                                                                                                                                                                                                            |
| <b>Education</b>           | This is an indicator variable that describes the individual's level of education.                                                                                        | 1=primary: 6 or fewer years of formal education<br>2=secondary: 6.01-12 years of formal education<br>3=tertiary: 12.01 or more years of formal education<br><br>-9 = information not available<br><i>Note: for children and adolescents, the level of education refers to that of the head of household.</i>                  |
| <b>Pregnancy/Lactation</b> | This is a variable that indicates whether an individual is pregnant or nursing mother                                                                                    | 0= not pregnant or nursing<br><br>1 = pregnant<br><br>2 = nursing<br><br>-9= information not available                                                                                                                                                                                                                        |
| <b>Geocode</b>             | Latitude and longitude for the area representing the individual's place of permanent residence.                                                                          | Latitude: a continuous variable from 0 to (+/-) 90 degrees, to the hundredth place.<br><br>Longitude: a continuous variable from 0 to (+/-) 180 degrees, to the hundredth place.                                                                                                                                              |
| <b>Sample weight</b>       | The sampling weight (i.e. probability weight), calculated as the inverse of the probability of a participant being included in the sample in the survey sampling design. | A continuous positive non-zero numeric variable.                                                                                                                                                                                                                                                                              |

|                               |                                                                                                                              |                                                                                                    |
|-------------------------------|------------------------------------------------------------------------------------------------------------------------------|----------------------------------------------------------------------------------------------------|
| <b>Primary sampling units</b> | The primary sampling unit (PSU) of the survey, i.e. the sampling unit selected in the primary stage of a multi-stage sample. | An indicator variable with integer values where each integer represents a level of the PSU.        |
| <b>Stratum</b>                | The mutually exclusive strata used in multi-stage stratified sampling.                                                       | An indicator variable with integer values where each integer represents a level of stratification. |

## Appendix S2. Data identification and retrieval

### Text S2. Overview of data search, identification, and retrieval process

#### Data Identification

Surveys measuring dietary intakes were identified through three approaches:

- Systematic searches of available literature to identify publications on relevant surveys. Corresponding authors were then invited to collaborate and share data with the GDD. Searching databases of publicly-available data. Relevant surveys were identified, and data were downloaded when available.
- Re-contacting 199 corresponding members of the GDD 2010. Existing contacts were invited to update previously-shared data with additional demographic stratum or dietary factors, or to submit new data.

#### Review of published literature

We conducted a systematic review of literature published on population-based nutritional surveys around the world. Detailed information on the search terms is provided below and in Table S3. In summary, studies were included if they were from a population-based sample, had information on at least one dietary factor of interest, and collected data via a valid dietary assessment method from a population of at least 100 individuals. No restrictions were placed on the publication language and translators were utilized when applicable. The United States was excluded from the search, as data were already available for multiple individual-level nationally representative health examination surveys(2).

Medline search: We primarily searched Medline (via PubMed) for articles published between 1980 and the time the search was conducted, 2014-2015. All human infants, children, and adults were included.

LILACS database search: We searched the Latin American and Caribbean Health Sciences database in September and October 2015 for studies in data-sparse Latin American and Caribbean countries not captured via Medline search.

African Index Medicus and Web of Science search: We searched the African Index Medicus and Web of Science databases in October 2015 for studies not captured via the Medline search.

#### Publicly available data search

Publicly available online surveys containing dietary intake data were identified through suggestions from colleagues, searches of other published literature (including via systematic reviews), and through online web searches.

#### Data Inclusion

Published studies were included if the:

- Survey sample was not limited to a subgroup whose diet would significantly differ from the general population, e.g. only diabetics, only overweight/obese individuals, only specific ethnic minorities or immigrants.
- Survey was nationally, sub-nationally or locally representative.
- Survey had a sample size greater than 100.
- Survey had information on at least one of the dietary factors of interest.
- Survey was based on a valid dietary assessment method including multiple or single short-term diet recalls, and Food Frequency Questionnaires.

Surveys identified were included if they met the inclusion criteria and had not previously been identified through the GDD 2010. For the systematic review of published literature, all studies identified through the database search were assessed for inclusion by title/abstract by one reviewer. All studies marked for inclusion during title/abstract review were then assessed by full text, and author contact information was extracted from included studies for future correspondence. Subsets of studies were reviewed by a second reviewer to ensure consistency and accuracy of study inclusion/exclusion.

#### Data Retrieval

Corresponding authors from included studies were invited by email to collaborate with the GDD 2017 by sharing their available dietary intake data. Authors were invited to visit the GDD 2017 web application, register an account, complete a data-sharing agreement, enter characteristics of the survey they wish to share, and then submit dietary intake data from that survey. Survey data extraction was considered complete when authors successfully shared data, responded that data were unavailable for sharing, or were non-responsive to multiple contact attempts. Data owners were invited to share individual-level microdata, either formatted to match the GDD data dictionary in raw format, or aggregate level data to match GDD strata. Data owners who were unresponsive to initial invitation or who only partially completed the survey submission were re-contacted up to 6 times, and if available, at alternate email addresses.



**Table S3. Systematic review search terms for Medline, Web of Science, LILACS, African Index Medicus**

|                                                        |                                                                                                                                                                                                                                                                                                                                                                                                                                                                                                                                                                                                                                                                                                                                                                                                                                                                                                                                                                                                                                                                                                                                                                                                                                                                                                                                                                                                                                                                                                                                                                                                                                                                                                                                                                                                                                                                                                                                                                                                                                                                                                                                                                                                                                                                                                                                                                                                                                                                                                                                                                                                                                                                                                                                                                                                                                                                                                                                                                                                                                                                                                                                                                                                                                                                                                                                                                                                                                                                                                                                                                                                                                                                                                                                                                                                                                                                                                                                                                                                                                                                                                                                                                                                         |
|--------------------------------------------------------|---------------------------------------------------------------------------------------------------------------------------------------------------------------------------------------------------------------------------------------------------------------------------------------------------------------------------------------------------------------------------------------------------------------------------------------------------------------------------------------------------------------------------------------------------------------------------------------------------------------------------------------------------------------------------------------------------------------------------------------------------------------------------------------------------------------------------------------------------------------------------------------------------------------------------------------------------------------------------------------------------------------------------------------------------------------------------------------------------------------------------------------------------------------------------------------------------------------------------------------------------------------------------------------------------------------------------------------------------------------------------------------------------------------------------------------------------------------------------------------------------------------------------------------------------------------------------------------------------------------------------------------------------------------------------------------------------------------------------------------------------------------------------------------------------------------------------------------------------------------------------------------------------------------------------------------------------------------------------------------------------------------------------------------------------------------------------------------------------------------------------------------------------------------------------------------------------------------------------------------------------------------------------------------------------------------------------------------------------------------------------------------------------------------------------------------------------------------------------------------------------------------------------------------------------------------------------------------------------------------------------------------------------------------------------------------------------------------------------------------------------------------------------------------------------------------------------------------------------------------------------------------------------------------------------------------------------------------------------------------------------------------------------------------------------------------------------------------------------------------------------------------------------------------------------------------------------------------------------------------------------------------------------------------------------------------------------------------------------------------------------------------------------------------------------------------------------------------------------------------------------------------------------------------------------------------------------------------------------------------------------------------------------------------------------------------------------------------------------------------------------------------------------------------------------------------------------------------------------------------------------------------------------------------------------------------------------------------------------------------------------------------------------------------------------------------------------------------------------------------------------------------------------------------------------------------------------------|
| <p><b>Medline, Web of Science primary search</b></p>   | <p>("nutrition"[tiab] OR "nutritional status"[MeSH] OR "diet"[tiab] OR "diet"[MeSH] OR "food habits"[MeSH] OR "food habits"[tiab] OR "fruit"[MeSH] OR "fruit"[tiab] OR "fruits"[tiab] OR "fruit juice" [tiab] OR "fruit juices" [tiab] OR "nuts"[MeSH] OR "nuts"[tiab] OR "nut"[tiab] OR "seeds"[MeSH] OR "seeds"[tiab] OR "seed"[tiab] OR "peanut*" [tiab] OR "vegetables"[MeSH] OR "vegetables"[tiab] OR "vegetable"[tiab] OR "potato"[tiab] OR "potatoes"[tiab] OR "solanum tuberosum"[MeSH] OR "starchy vegetables"[tiab] OR "lentil"[tiab] OR "lentils"[tiab] OR "peas"[MeSH] OR "bean"[tiab] OR "beans"[tiab] OR "legume"[tiab] OR "legumes"[tiab] OR "whole grains"[tiab] OR "whole grain"[tiab] OR "refined grains"[tiab] OR "refined grain"[tiab] OR "meat"[Mesh] OR "meat"[tiab] OR "meat products"[MeSH] OR "processed meat"[tiab] OR "fishes"[MeSH] OR "fish products"[MeSH] OR "fish"[tiab] OR "seafood"[MeSH] OR "seafood"[tiab] OR "egg"[tiab] OR "eggs"[tiab] OR "egg proteins, dietary"[MeSH] OR "milk" [MeSH] OR "milk" [tiab] OR "cultured milk products"[MeSH] OR "cultured milk products"[tiab] OR "fermented milk"[tiab] OR "yogurt"[MeSH] OR "yogurt"[tiab] OR "yoghurt"[tiab] OR "cheese"[MeSH] OR "cheese"[tiab] OR "cheeses"[tiab] OR "sugar-sweetened beverages" [tiab] OR "sugar-sweetened beverage" [tiab] OR "sweetened beverages" [tiab] OR "sweetened beverage" [tiab] OR "beverages" [MeSH] OR "sugary beverage"[tiab] OR "sugary beverages"[tiab] OR "coffee"[MeSH] OR "coffee"[tiab] OR "tea"[MeSH] OR "tea"[tiab] OR "dietary sucrose" [MeSH] OR "added sugar"[tiab] OR "added sugars"[tiab] OR "energy intake" [MeSH] OR "energy intake" [tiab] OR "dietary carbohydrates"[MeSH] OR "dietary carbohydrates"[tiab] OR "dietary proteins"[MeSH] OR "vegetable proteins"[MeSH] OR "saturated fat"[tiab] OR "fatty acids, unsaturated"[MeSH] OR "dietary fats, unsaturated"[MeSH] OR "polyunsaturated"[tiab] OR "omega-6"[tiab] OR "alpha-linolenic"[tiab] OR "oleic"[tiab] OR "linoleic"[tiab] OR "omega-3"[tiab] OR "fatty acids, omega-3"[MeSH] OR "monounsaturated fat"[tiab] OR "fatty acids, monounsaturated"[MeSH] OR "trans fatty acids"[MeSH] OR "trans-fatty"[tiab] OR "trans fatty"[tiab] OR "trans fat"[tiab] OR "cholesterol, dietary" [MeSH] OR "dietary cholesterol" [tiab] OR "dietary fiber" [MeSH] OR "dietary fiber" [tiab] OR "dietary fibers" [tiab] OR "sodium, dietary" [MeSH] OR "dietary sodium" [tiab] OR "sodium chloride"[MeSH] OR "salt"[tiab] OR "potassium, dietary"[MeSH] OR "dietary potassium"[tiab] OR "calcium, dietary" [MeSH] OR "dietary calcium" [tiab] OR "iron, dietary"[MeSH] OR "dietary iron"[tiab] OR "zinc"[MeSH] OR "dietary zinc"[tiab] OR "magnesium"[MeSH] OR "dietary magnesium"[tiab] OR "selenium"[MeSH] OR "dietary selenium"[tiab] OR "iodine"[MeSH] OR "dietary iodine"[tiab] OR "vitamin A"[MeSH] OR "retinoids"[MeSH] OR "carotenoids"[MeSH] OR "dietary vitamin A"[tiab] OR "vitamin D"[MeSH] OR "dietary vitamin D" [tiab] OR "vitamin E"[MeSH] OR "tocopherols"[MeSH] OR "dietary vitamin E"[tiab] OR "tocopherol"[tiab] OR "tocopherols"[tiab] OR "ascorbic acid"[MeSH] OR "dietary vitamin C"[tiab] OR "ascorbic acid"[tiab] OR "vitamin B complex"[MeSH] OR "thiamine"[MeSH] OR "dietary vitamin B1"[tiab] OR "dietary thiamine"[tiab] OR "riboflavin"[MeSH] OR "niacin"[MeSH] OR "pantothenic acid"[MeSH] OR "pyridoxine"[MeSH] OR "biotin"[MeSH] OR "folic acid"[MeSH] OR "vitamin B 6"[MeSH] OR "dietary riboflavin"[tiab] OR "dietary niacin"[tiab] OR "dietary pyridoxine"[tiab] OR "dietary biotin"[tiab] OR "dietary folate"[tiab] OR "dietary folic acid"[tiab] OR "vitamin B 12"[MeSH] OR "dietary vitamin B 12"[tiab] OR "dietary cobalamin"[tiab] OR "glycemic index"[MeSH] OR "glycemic index"[tiab] OR "glycemic load"[tiab] NOT "polymorphism"[tiab]) AND ("national survey"[tiab] OR "national surveys"[tiab] OR "subnational surveys"[tiab] OR "population-based"[tiab] OR "nutrition assessment"[MeSH] OR "nutrition surveys"[MeSH] OR "diet records"[MeSH] OR "diet surveys"[MeSH]) AND (Humans[Mesh])AND ("1980/01/01"[PDat] : "3000/12/31"[PDat] )AND ("country name" [MeSH])</p> |
| <p><b>Medline, Web of Science secondary search</b></p> | <p>("nutrition"[tiab] OR "nutritional status"[MeSH] OR "diet"[tiab] OR "diet"[MeSH] OR "food habits"[MeSH] OR "food habits"[tiab] OR "fruit"[MeSH] OR "fruit"[tiab] OR "fruits"[tiab] OR "fruit juice" [tiab] OR "fruit juices" [tiab] OR "nuts"[MeSH] OR "nuts"[tiab] OR "nut"[tiab] OR "seeds"[MeSH] OR "seeds"[tiab] OR "seed"[tiab] OR "peanut*" [tiab] OR "vegetables"[MeSH] OR "vegetables"[tiab] OR "vegetable"[tiab] OR "potato"[tiab] OR "potatoes"[tiab] OR "solanum tuberosum"[MeSH] OR "starchy vegetables"[tiab] OR "lentil"[tiab] OR "lentils"[tiab] OR "peas"[MeSH] OR "bean"[tiab] OR "beans"[tiab] OR "legume"[tiab] OR "legumes"[tiab] OR "whole grains"[tiab] OR "whole grain"[tiab] OR "refined grains"[tiab] OR "refined grain"[tiab] OR</p>                                                                                                                                                                                                                                                                                                                                                                                                                                                                                                                                                                                                                                                                                                                                                                                                                                                                                                                                                                                                                                                                                                                                                                                                                                                                                                                                                                                                                                                                                                                                                                                                                                                                                                                                                                                                                                                                                                                                                                                                                                                                                                                                                                                                                                                                                                                                                                                                                                                                                                                                                                                                                                                                                                                                                                                                                                                                                                                                                                                                                                                                                                                                                                                                                                                                                                                                                                                                                                       |

|                             |                                                                                                                                                                                                                                                                                                                                                                                                                                                                                                                                                                                                                                                                                                                                                                                                                                                                                                                                                                                                                                                                                                                                                                                                                                                                                                                                                                                                                                                                                                                                                                                                                                                                                                                                                                                                                                                                                                                                                                                                                                                                                                                                                                                                                                                                                                                                                                                                                                                                                                                                                                                                                                                                                                                                                                                                                                                                                                                                                                                                                                                                                                                                                                                                                                                                                                                                                                                                                                                                                                                            |
|-----------------------------|----------------------------------------------------------------------------------------------------------------------------------------------------------------------------------------------------------------------------------------------------------------------------------------------------------------------------------------------------------------------------------------------------------------------------------------------------------------------------------------------------------------------------------------------------------------------------------------------------------------------------------------------------------------------------------------------------------------------------------------------------------------------------------------------------------------------------------------------------------------------------------------------------------------------------------------------------------------------------------------------------------------------------------------------------------------------------------------------------------------------------------------------------------------------------------------------------------------------------------------------------------------------------------------------------------------------------------------------------------------------------------------------------------------------------------------------------------------------------------------------------------------------------------------------------------------------------------------------------------------------------------------------------------------------------------------------------------------------------------------------------------------------------------------------------------------------------------------------------------------------------------------------------------------------------------------------------------------------------------------------------------------------------------------------------------------------------------------------------------------------------------------------------------------------------------------------------------------------------------------------------------------------------------------------------------------------------------------------------------------------------------------------------------------------------------------------------------------------------------------------------------------------------------------------------------------------------------------------------------------------------------------------------------------------------------------------------------------------------------------------------------------------------------------------------------------------------------------------------------------------------------------------------------------------------------------------------------------------------------------------------------------------------------------------------------------------------------------------------------------------------------------------------------------------------------------------------------------------------------------------------------------------------------------------------------------------------------------------------------------------------------------------------------------------------------------------------------------------------------------------------------------------------|
|                             | <p>"meat"[Mesh] OR "meat"[tiab] OR "meat products"[MeSH] OR "processed meat"[tiab] OR "fishes"[MeSH] OR "fish products"[MeSH] OR "fish"[tiab] OR "seafood"[MeSH] OR "seafood"[tiab] OR "egg"[tiab] OR "eggs"[tiab] OR "egg proteins, dietary"[MeSH] OR "milk"[MeSH] OR "milk"[tiab] OR "cultured milk products"[MeSH] OR "cultured milk products"[tiab] OR "fermented milk"[tiab] OR "yogurt"[MeSH] OR "yogurt"[tiab] OR "yoghurt"[tiab] OR "cheese"[MeSH] OR "cheese"[tiab] OR "cheeses"[tiab] OR "sugar-sweetened beverages"[tiab] OR "sugar-sweetened beverage"[tiab] OR "sugary beverage"[tiab] OR "sugary beverages"[tiab] OR "coffee"[MeSH] OR "coffee"[tiab] OR "tea"[MeSH] OR "tea"[tiab] OR "dietary sucrose"[MeSH] OR "added sugar"[tiab] OR "added sugars"[tiab] OR "energy intake"[MeSH] OR "energy intake"[tiab] OR "dietary carbohydrates"[MeSH] OR "dietary carbohydrates"[tiab] OR "dietary proteins"[MeSH] OR "vegetable proteins"[MeSH] OR "saturated fat"[tiab] OR "fatty acids, unsaturated"[MeSH] OR "dietary fats, unsaturated"[MeSH] OR "polyunsaturated"[tiab] OR "omega-6"[tiab] OR "alpha-linolenic"[tiab] OR "oleic"[tiab] OR "linoleic"[tiab] OR "omega-3"[tiab] OR "fatty acids, omega-3"[MeSH] OR "monounsaturated fat"[tiab] OR "fatty acids, monounsaturated"[MeSH] OR "trans fatty acids"[MeSH] OR "trans-fatty"[tiab] OR "trans fatty"[tiab] OR "trans fat"[tiab] OR "cholesterol, dietary"[MeSH] OR "dietary cholesterol"[tiab] OR "dietary fiber"[MeSH] OR "dietary fiber"[tiab] OR "dietary fibers"[tiab] OR "sodium, dietary"[MeSH] OR "dietary sodium"[tiab] OR "sodium chloride"[MeSH] OR "salt"[tiab] OR "potassium, dietary"[MeSH] OR "dietary potassium"[tiab] OR "calcium, dietary"[MeSH] OR "dietary calcium"[tiab] OR "iron, dietary"[MeSH] OR "dietary iron"[tiab] OR "zinc"[MeSH] OR "dietary zinc"[tiab] OR "magnesium"[MeSH] OR "dietary magnesium"[tiab] OR "selenium"[MeSH] OR "dietary selenium"[tiab] OR "iodine"[MeSH] OR "dietary iodine"[tiab] OR "vitamin A"[MeSH] OR "retinoids"[MeSH] OR "carotenoids"[MeSH] OR "dietary vitamin A"[tiab] OR "vitamin D"[MeSH] OR "dietary vitamin D"[tiab] OR "vitamin E"[MeSH] OR "tocopherols"[MeSH] OR "dietary vitamin E"[tiab] OR "tocopherol"[tiab] OR "tocopherols"[tiab] OR "ascorbic acid"[MeSH] OR "dietary vitamin C"[tiab] OR "ascorbic acid"[tiab] OR "vitamin B complex"[MeSH] OR "thiamine"[MeSH] OR "dietary vitamin B1"[tiab] OR "dietary thiamine"[tiab] OR "riboflavin"[MeSH] OR "niacin"[MeSH] OR "pantothenic acid"[MeSH] OR "pyridoxine"[MeSH] OR "biotin"[MeSH] OR "folic acid"[MeSH] OR "vitamin B 6"[MeSH] OR "dietary riboflavin"[tiab] OR "dietary niacin"[tiab] OR "dietary pyridoxine"[tiab] OR "dietary biotin"[tiab] OR "dietary folate"[tiab] OR "dietary folic acid"[tiab] OR "vitamin B 12"[MeSH] OR "dietary vitamin B 12"[tiab] OR "dietary cobalamin"[tiab] OR "glycemic index"[MeSH] OR "glycemic index"[tiab] OR "glycemic load"[tiab] NOT "polymorphism"[tiab] AND ("national survey"[tiab] OR "national surveys"[tiab] OR "subnational surveys"[tiab] OR "population-based"[tiab] OR "nutrition assessment"[MeSH] OR "nutrition surveys"[MeSH] OR "diet records"[MeSH] OR "diet surveys"[MeSH] OR "diet recall"[tiab] OR "food frequency questionnaire"[tiab] OR "FFQ"[tiab] OR "diet record"[tiab] OR "diet records"[tiab] OR "household surveys"[tiab] OR "household survey"[tiab]) AND (Humans[Mesh])AND ("1980/01/01"[PDat] : "3000/12/31"[PDat] )AND ("country name"[MeSH])</p> |
| <p><b>LILACS search</b></p> | <p>(nutrition OR "nutritional status" OR diet OR "food habits" OR fruit OR fruits OR "fruit juice" OR "fruit juices" OR nuts OR nut OR seeds OR seed OR peanut OR vegetables OR vegetable OR potato OR potatoes OR "solanum tuberosum" OR "starchy vegetables" OR lentil OR lentils OR peas OR bean OR beans OR legume OR legumes OR "whole grains" OR "whole grain" OR "refined grains" OR "refined grain" OR meat OR "meat products" OR "processed meat" OR "processed meats" OR fish OR fishes OR "fish products" OR seafood OR egg OR eggs OR "egg protein" OR milk OR "cultured milk products" OR "fermented milk" OR yogurt OR yoghurt OR cheese OR cheeses OR "sugar-sweetened beverages" OR "sugar-sweetened beverage" OR "sweetened beverage" OR "sweetened beverages" OR beverages OR beverage OR "sugary beverages" OR "sugary beverage" OR "coffee" OR tea OR "dietary sucrose" OR "added sugar" OR "added sugars" OR "energy intake" OR "dietary carbohydrates" OR "dietary carbohydrate" OR "dietary protein" OR "dietary proteins" OR "vegetable protein" OR "saturated fat" OR "unsaturated fatty acids" OR "unsaturated dietary fats" OR polyunsaturated OR "omega-6" OR "alpha-linolenic" OR oleic OR linoleic OR "omega-3" OR "omega-3 fatty acids" OR "monounsaturated fat" OR "monounsaturated fatty acids" OR "trans fatty acids" OR "trans-fatty" OR "trans fatty" OR "trans fat" OR "dietary cholesterol" OR "dietary fiber" OR "dietary fibers" OR "dietary sodium" OR</p>                                                                                                                                                                                                                                                                                                                                                                                                                                                                                                                                                                                                                                                                                                                                                                                                                                                                                                                                                                                                                                                                                                                                                                                                                                                                                                                                                                                                                                                                                                                                                                                                                                                                                                                                                                                                                                                                                                                                                                                                                        |

|                                            |                                                                                                                                                                                                                                                                                                                                                                                                                                                                                                                                                                                                                                                                                                                                                                                                                                                                                                                                                                                                                                                                       |
|--------------------------------------------|-----------------------------------------------------------------------------------------------------------------------------------------------------------------------------------------------------------------------------------------------------------------------------------------------------------------------------------------------------------------------------------------------------------------------------------------------------------------------------------------------------------------------------------------------------------------------------------------------------------------------------------------------------------------------------------------------------------------------------------------------------------------------------------------------------------------------------------------------------------------------------------------------------------------------------------------------------------------------------------------------------------------------------------------------------------------------|
|                                            | <p>"sodium chloride" OR salt OR "dietary potassium" OR "dietary calcium" OR "dietary iron" OR zinc OR "dietary zinc" OR magnesium OR "dietary magnesium" OR selenium OR "dietary selenium" OR iodine OR "dietary iodine" OR "vitamin A" OR retinoids OR carotenoids OR "dietary vitamin A" OR "vitamin D" OR "dietary vitamin D" OR "vitamin E" OR tocopherols OR "dietary vitamin E" OR tocopherol OR "ascorbic acid" OR "dietary vitamin C" OR "vitamin B complex" OR thiamine OR "dietary vitamin B1" OR "dietary thiamine" OR riboflavin OR niacin OR "pantothenic acid" OR pyridoxine OR biotin OR "folic acid" OR "vitamin B 6" OR "dietary riboflavin" OR "dietary niacin" OR "dietary pyridoxine" OR "dietary biotin" OR "dietary folate" OR "dietary folic acid" OR "vitamin B 12" OR "dietary vitamin B 12" OR "dietary cobalamin" OR "glycemic index" OR "glycemic load") AND ("national survey" OR "national surveys" OR "population-based" OR "nutrition assessment" OR "nutrition surveys" OR "diet record" OR "diet surveys") AND ("country name")</p> |
| <p><b>African Index Medicus search</b></p> | <p>(national survey OR national surveys OR subnational surveys OR population-based OR nutrition assessment OR nutrition surveys OR diet records OR diet record OR diet surveys OR diet recall OR food frequency questionnaire OR FFQ OR diet records OR household surveys OR household survey [Descriptor])</p>                                                                                                                                                                                                                                                                                                                                                                                                                                                                                                                                                                                                                                                                                                                                                       |

### **Appendix S3. Data assessment and analysis**

#### **Text S3. Description of data assessment, standardization, analysis, and storage**

##### **Data Storage**

Data received through the GDD web application or GDD email account were stored on the Tufts GDD Box. Survey-specific folders were generated to securely store original data files, survey information files, original publications, and any communication from corresponding members.

##### **Data Assessment**

Data received from corresponding members or from publicly available surveys were checked to confirm survey-level characteristics; dietary intake variables were categorized into GDD dietary factors; necessary unit and format conversions were noted. Data-owners or survey directors were contacted extensively to resolve questions about data quality, categorization, or assessment methods to ensure accuracy and completeness of data prior to analysis.

##### **Preliminary Data Checks**

Biostatisticians generated survey description files for each survey including survey characteristics, variable lists, and summary statistics for categorical and continuous variables. Research assistants used these description files to assess inclusion of survey level information and demographic variables. Discrepancies between author-reported characteristics and those ultimately included in the dataset were noted for further discussion with the data-owner.

##### **Categorization of variables into GDD dietary factors**

Research assistants matched reported dietary data to GDD dietary factors. This involved categorizing foods, nutrients, mixed dishes, and regional items into the matched GDD dietary factor, noting cases where variables represented less than the optimal GDD definition. Unit conversions were included as necessary to transform variables into the optimal GDD units.

##### **Categorization of variables into GDD dietary factors – Food Frequency Questionnaires**

To transform food and beverage data reported from Food Frequency Questionnaires into optimal GDD units, most often grams per day, all categorical variables were standardized into single daily serving units (see Table S5). When ranges of frequencies were provided, the mean of each range was utilized to represent each frequency category. Variables reported in times per week were divided by 7 to calculate the average daily servings. Variables reported in times per month were divided by 30.42 (the average number of days in a month) to calculate the average daily servings. In cases where the upper range was open-ended (e.g., “5 or more times per week”), the ranges of the other frequency categories were used to calculate an upper limit. Servings per day were then converted into grams per day by multiplying the number of servings by the author-reported serving sizes or by the GDD standard serving sizes<sup>(3)</sup>(Table S6).

##### **Communication with data owners and creation of data key**

Any questions regarding the data, including those about region-specific diets (e.g., disaggregation of mixed dishes, classification of regional items), survey-level characteristics, and serving sizes for foods and beverages, were communicated to the data owner. After all questions regarding the data were answered, research assistants generated a data key outlining all available variables of interest, including demographic and dietary variables. Categorizations of dietary variables were turned into STATA code for clear identification and research assistants flagged the quality assurance checks.

##### **Quality Control Part I: Ensuring accuracy of dietary variables**

After being completed by a primary reviewer, a second research assistant reviewed the preliminary checks and data key to ensure that variables were classified, conversions were applied, and coding was written properly before forwarding on to statisticians for aggregation. Any questions about the data were discussed amongst the reviewers or the entire GDD core team and, when appropriate, the corresponding member was contacted to clarify any discrepancies.

##### **Converting household data to individual data**

Household-level data were transformed into individual-level data using the Adult Male Equivalent (AME) method (Table S8). The AME method estimates individual-level intakes by assigning each household member a reference AME based on their age and sex(4). Household members' reference AMEs are summed to find total household AME. Each individual's reference AME is then divided by the total household AME to find individual-level AME. This individual-level AME represents the proportion each individual contributes to the overall household AME. This individual level proportion is multiplied by the household consumption of each food item to estimate individual-level intake.

### Data aggregation

Using preliminary checking documents provided by research assistants, biostatisticians converted individual-level data into aggregated outputs for each dietary factor stratified by the available demographic variables. Stata version 12 was used to convert all demographic and dietary variables from raw data files to a single data file containing only relevant variables. Missing observations were excluded from the dataset and all variables were recoded to match the GDD demographic and dietary variable coding scheme. Data were then aggregated into demographic strata by age, sex, residence, education, and pregnancy/lactating status. In addition to the single, final data file, supporting files were generated including a summary report, minimum/maximum values for each dietary factor, and group level means, standard deviations, and percentiles of intake. All output files were stored in each survey's specific folder on the Tufts GDD Box, accessible to all members of the research team.

### Energy adjustment

We extracted both raw and energy-adjusted data when available. If energy adjustment of individual-level data had not been completed by the data owner, biostatisticians completed energy adjustment at the aggregation stage to age-specific levels (Table S4) using the residual method (5). This approach was considered the "gold standard." We adjusted for total energy intake to mitigate the effects of measurement error in data collection, account for differences in energy requirements related to body size, metabolic efficiency and physical activity, and facilitate comparisons between surveys, age groups, and sexes.

**Table S4.** Total daily energy values by age

| Age (years) | Daily energy intake (kcal) |
|-------------|----------------------------|
| 0-0.9       | 700                        |
| 1-1.9       | 1,000                      |
| 2-5         | 1,300                      |
| 6-10        | 1,700                      |
| 11-74       | 2,000                      |
| 75+         | 1,700                      |

Child and older adult-specific daily energy values were selected using dietary recommendations and mean population ranges from the USA (6,7), United Kingdom (8) and India (9).

### Energy adjustment corrections

We initially asked that all data be shared both unadjusted and energy-adjusted to 2,000 kcal, regardless of age category, but retrospectively changed this decision to reflect the age-specific levels in Table S4. When possible, energy adjustment using the residual method was repeated to reflect these changes. In some cases, this approach was not possible, and thus alternative approaches for energy adjustment correction were taken.

#### *Energy adjustment correction of aggregate ("stratum-level") data*

In some cases, data were provided or accessed at the stratum level (i.e. age group, sex, education level, etc.). In these cases, energy adjustment correction depended on whether 2,000 kcal/day-adjusted values had previously been provided by the data owner. If energy-adjusted data had been provided, a simple ratio of the age-specific level to 2,000 kcal was applied post-hoc to convert the value to the correct energy level. If stratum-level data were only provided in an unadjusted format but with corresponding total energy intake, intake was adjusted to the age-specific energy level using the energy density method, in which a simple ratio of reported calorie intake to age-specific level was applied to the unadjusted value. If stratum-level data were provided in age groups which traversed more than one level of age-specific energy intake, a weighted mean daily energy intake was calculated. This weighted mean daily energy level was then used to adjust intake using the ratio readjustment method. If only unadjusted intake was available, the energy density method was used.

#### *Energy adjustment of data without adjusted values or total energy intake*

In limited cases, individual-level data were not initially energy-adjusted or provided with mean caloric intake data, precluding the use of the gold standard and ratio readjustment methods. In these instances, daily per capita energy availability data from FAO Food Balance

Sheets (FBS) were used to inform stratum-level caloric intake, following methods described by Del Gobbo et al., (6). In short, country-year-specific FBS energy data were adjusted using coefficients derived from a multivariate linear regression of GDD input data, FBS data, and both regional and survey-level covariates. Adjusted FBS energy was then corrected to the prescribed energy level by applying a factor of the energy level's proportion of 2,000 kcal. Unadjusted food and nutrient intake values were then adjusted with this corrected energy intake via the energy density method.

### Quality Control Part II: Survey Plausibility and Quality Assessment

Group level means were assessed for plausibility by flagging any values that fell beyond a biologically plausible range (Tables S9, S11, S13). If means were flagged as implausible, they were assessed for correctness within the research team and discussed with the data owner to determine inclusion status. Additionally, even if within the predetermined plausibility range, if a stratum mean appeared vastly different from other, similar strata from the same survey, the original data was examined for extreme outliers that could account for this difference.

Quality checks were performed by a different research assistant to ensure all data checking procedures had been completed accurately.

### Data Finalization

After data has been finalized for inclusion, it is stored within the Access database, which houses information on all surveys, corresponding authors, and survey checking statuses. Aggregated data is collated by dietary factor and prepared for input into the GDD prediction model.

### Protocol for Converting FFQ Frequency Data into GDD Servings

1. Step 1- Standardize the categorical frequency variables to a single daily serving unit (Table S5 for examples)
  - a. If a range of frequencies is given, take the mean ("Avg") of the range
  - b. If the frequency is presented in times/week, divide by 7 (for days in a week)
  - c. If the frequency is presented in times/month, divide by 30.42 (average days in a month)
    - i. **Note:** If the category is presented as days/week instead of times/week, assume one serving per day and treat as times/week
    - ii. Example A)  $5-7 \text{ days/week} = (6 \text{ days/week}) / (7 \text{ days/week}) = 0.857 \text{ servings/day}$
    - iii. Example B)  $1-3 \text{ times/month} = (2 \text{ times/month}) / (30.42 \text{ days/month}) = 0.066 \text{ servings/day}$
  - d. If the upper range is open ended, use the range of the other frequency categories in the survey to create an upper limit and then take the average of that range.
    - i. Example: "5 or more times per week" where next lowest level is 2-4 times per week. Assume a range of 5-7 times per week, take the average  $(6 \text{ times per week}) / (7 \text{ days/week}) = 0.857 \text{ servings/day}$
2. Step 2- Convert servings to grams [**Exception: Tea and coffee should be converted to cups**]
  - a. If available, survey-specific serving sizes were used for conversions.
  - b. If survey-specific serving sizes are not available, ask the data owner for usual, country-specific serving sizes.
  - c. If data owner does not provide country-specific serving sizes, utilize country-specific serving sizes identified from national agencies (e.g. USDA).
  - d. If no country-specific serving sizes are identified, use the GDD standard serving size conversions (Table S7).

**Table S5. Common Categories of Intake and Their Servings per Day Conversions**

| Categorical Variable                         | Calculation                                                                                        | Daily Serving                         |
|----------------------------------------------|----------------------------------------------------------------------------------------------------|---------------------------------------|
| Never                                        | 0                                                                                                  | 0                                     |
| Occasional-Few times/year*                   | Should capture the range of values between never and the next highest choice based on the data set | *Depends on next level categorization |
| Less than once a month (1-11 times per year) | $1+11=12/2=6$ Avg servings/year<br>$6/12$ months=0.5 servings/month<br>0.5/30.42 days              | 0.0164                                |
| 1-3 times/month                              | $1+3=4/2=2$ Avg servings/month<br>2/30.42 days                                                     | 0.066                                 |
| 1/week                                       | 1 servings/7days                                                                                   | 0.143                                 |
| 2-4 days/week                                | $2+4=6/2=3$ Avg servings/week<br>3servings/7days                                                   | 0.429                                 |
| 5-6 days/week                                | $5+6=11/2= 5.5$ Avg servings/week<br>5.5/7days                                                     | 0.786                                 |
| 5-7 days/week                                | $5+7=12/2=6$ Avg servings/week<br>6/7days                                                          | 0.857                                 |
| 1/day                                        |                                                                                                    | 1                                     |
| 2-3/day                                      | $2+3=5/2=$ Avg 2.5 servings                                                                        | 2.5                                   |
| 4-5/day                                      | $4+5=9/2=$ Avg 4.5 servings                                                                        | 4.5                                   |

**Table S6. Common Weight Conversions**

| Provided weight                      | Grams |
|--------------------------------------|-------|
| 1 Kilogram                           | 1000  |
| 1 Ounce *Cannot use for fluid ounces | 28    |
| 1 Pound                              | 454   |

**Table S7. Standard serving sizes for foods and beverages**

| Dietary factor |                               | Reference serving sizes    | "Usual" average serving sizes (g/serving) |              |                |
|----------------|-------------------------------|----------------------------|-------------------------------------------|--------------|----------------|
| Variable Code  | Variable name                 | 2003-06 US NHANES (median) | Adults and children older than 2 years    | 12-24 months | 6 to 11 months |
| v01            | Fruits°                       | 110 g per serving          | 100                                       | 75           | 49             |
| v02            | Non-starchy vegetables°       | 40 g per serving           | 100                                       | 50           | 44             |
| v03            | Potatoes*                     | -                          | 186                                       | 61           | 34             |
| v04            | Other starchy vegetables*     | -                          | 160                                       | 47           | 42             |
| v05            | Beans/legumes°                | 86.5 g per serving         | 100                                       | 32           | 24             |
| v06            | Nuts/seeds                    | 29.75 g per serving        | 28.35                                     | 32           | 24             |
| v07            | Grains (refined and whole)°   | 48.975 g per serving       | 50                                        | 39           | 12             |
| v08            |                               |                            |                                           |              |                |
| v09            | Processed meats               | 53.705 g per serving       | 50                                        | 41           | 31             |
| v10            | Red meats                     | 85 g per serving           | 100                                       | 32           | 24             |
| v11            | Seafood*                      | 85.78 g per serving        | 85                                        | 30           | 23             |
| v12            | Eggs*                         | -                          | 55                                        | 59           | 44             |
| v13            | Cheese*                       | -                          | 42                                        | 22           | 20             |
| v14            | Yogurt*                       | -                          | 245                                       | 104          | 88             |
| v15            | Sugar-sweetened beverages*    | 368 g per serving          | 248                                       | 130          | 84             |
| v16            | Fruit juices*                 | 209.25 g per serving       | 248                                       | 130          | 84             |
| v17            | Coffee*                       | -                          | 248                                       | 129          | 82             |
| v18            | Tea*                          | -                          | 237                                       | 129          | 82             |
| v19            | Whole fat & reduced fat milk* | 198.25 g per serving       | 245                                       | 161          | 155            |
| v20            |                               |                            |                                           |              |                |
| v57            |                               |                            |                                           |              |                |

\*Calculated using average of item-specific serving sizes from the USDA Nutrient Database.

°Calculated using average if both item-specific serving sizes from the USDA Nutrient Database and intake from NHANES 2003-2006 (7).



**Adult Male Equivalent Methodology****Steps:****Step 1:** Identify each household and all members within that household.**Step 2:** Identify the age and sex of all members of a household.**Step 3:** Using age and sex, assign a reference AME to each household member as listed in Appendix A.**Step 4:** Sum the AMEs from each household member to find the total household AMEs.**Step 5:** Divide each household member's reference AME by the total household AME to determine individual AME.**Step 6:** Multiply the individual AME by the total household consumption estimate individual intake.**Table S8. Reference Adult Male Equivalents**

| AGE GROUP (y) | Adult Male Equivalent |                                         |                      |                       |
|---------------|-----------------------|-----------------------------------------|----------------------|-----------------------|
|               | MALE                  | FEMALE<br>(non-pregnant/ non-lactating) | FEMALE<br>(pregnant) | FEMALE<br>(lactating) |
| 0-1           | 0.213                 | 0.197                                   |                      |                       |
| 1-2           | 0.311                 | 0.279                                   |                      |                       |
| 2-3           | 0.369                 | 0.344                                   |                      |                       |
| 3-4           | 0.410                 | 0.377                                   |                      |                       |
| 4-5           | 0.443                 | 0.410                                   |                      |                       |
| 5-6           | 0.484                 | 0.434                                   |                      |                       |
| 6-7           | 0.516                 | 0.467                                   |                      |                       |
| 7-8           | 0.557                 | 0.508                                   |                      |                       |
| 8-9           | 0.598                 | 0.557                                   |                      |                       |
| 9-10          | 0.648                 | 0.607                                   |                      |                       |
| 10-11         | 0.705                 | 0.656                                   |                      |                       |
| 11-12         | 0.770                 | 0.705                                   |                      |                       |
| 12-13         | 0.836                 | 0.746                                   | 0.839                | 0.932                 |
| 13-14         | 0.910                 | 0.779                                   | 0.872                | 0.965                 |
| 14-15         | 0.984                 | 0.803                                   | 0.897                | 0.989                 |
| 15-16         | 1.041                 | 0.820                                   | 0.913                | 1.006                 |
| 16-17         | 1.090                 | 0.820                                   | 0.913                | 1.006                 |
| 17-18         | 1.115                 | 0.820                                   | 0.913                | 1.006                 |
| 18-30         | 1.000                 | 0.779                                   | 0.872                | 0.965                 |
| 30-60         | 0.984                 | 0.779                                   | 0.872                | 0.965                 |
| 60-150        | 0.811                 | 0.697                                   |                      |                       |

**Table S9. Group mean plausibility cutoffs for foods and beverages**

| Dietary Factor <sup>1,2</sup> | Age group | Serving Size <sup>3,4</sup> | Serving Size Units | Group mean minimum serving/day | Group mean minimum g/day | Group mean max serving/day | Group mean max g/day |
|-------------------------------|-----------|-----------------------------|--------------------|--------------------------------|--------------------------|----------------------------|----------------------|
| Fruits                        | All       | 100                         | grams              | ≤0                             | ≤0                       | 4                          | 400                  |
| Non-starchy vegetables        | All       | 100                         | grams              | ≤0                             | ≤0                       | 4                          | 400                  |
| Potatoes                      | All       | 150                         | grams              | ≤0                             | ≤0                       | 3                          | 450                  |
| Other starchy vegetables      | All       | 150                         | grams              | ≤0                             | ≤0                       | 3                          | 450                  |
| Beans/legumes                 | All       | 100                         | grams              | ≤0                             | ≤0                       | 4                          | 400                  |
| Nuts/seeds                    | All       | 28                          | grams              | ≤0                             | ≤0                       | 3                          | 84                   |
| Refined grains                | All       | 50                          | grams              | ≤0                             | ≤0                       | 6                          | 300                  |
| Whole grains                  | All       | 50                          | grams              | ≤0                             | ≤0                       | 3                          | 150                  |
| Processed meats               | All       | 50                          | grams              | ≤0                             | ≤0                       | 2                          | 100                  |
| Unprocessed red meats         | All       | 100                         | grams              | ≤0                             | ≤0                       | 2                          | 200                  |
| Seafood                       | All       | 100                         | grams              | ≤0                             | ≤0                       | 2                          | 200                  |
| Eggs                          | All       | 55                          | grams              | ≤0                             | ≤0                       | 2                          | 110                  |
| Cheese                        | All       | 42                          | grams              | ≤0                             | ≤0                       | 2                          | 84                   |
| Yogurt                        | All       | 245                         | grams              | ≤0                             | ≤0                       | 2                          | 490                  |
| Sugar-sweetened beverages     | Children  | 248                         | grams              | ≤0                             | ≤0                       | 6                          | 1488                 |
|                               | Adults    | 248                         | grams              | ≤0                             | ≤0                       | 4                          | 992                  |
| Fruit Juices                  | All       | 248                         | grams              | ≤0                             | ≤0                       | 3                          | 744                  |
| Coffee                        | Children  | 1                           | cups               | ≤0                             | ≤0                       | 2                          | 2                    |
|                               | Adults    | 1                           | cups               | ≤0                             | ≤0                       | 3                          | 3                    |
| Tea                           | Children  | 1                           | cups               | ≤0                             | ≤0                       | 3                          | 3                    |
|                               | Adults    | 1                           | cups               | ≤0                             | ≤0                       | 6                          | 6                    |
| Reduced fat milk              | All       | 245                         | grams              | ≤0                             | ≤0                       | 2                          | 490                  |
| Whole fat milk                | All       | 245                         | grams              | ≤0                             | ≤0                       | 2                          | 490                  |
| Total Milk                    | All       | 245                         | grams              | ≤0                             | ≤0                       | 2                          | 490                  |

1. The optimal unit for all dietary factors, except coffee and tea, is energy-adjusted grams/day. For coffee and tea the optimal unit is energy adjusted cups/day
2. Unless indicated, all plausibility values apply to all age groups. The children category includes ages 14 years and below.
3. Serving sizes were calculated by searching the USDA Nutrient Database for serving sizes of the most common types of each dietary factor. These values were then averaged together to estimate an overall serving size.
4. Recommended intakes are based off the US 2015-2020 Dietary Guidelines and were extracted from <http://www.choosemyplate.gov/MyPlate> (11). These values are appropriate for individuals with moderate caloric intake (2000 kcal) and less than 30 minutes per day of moderate physical activity.

**Table S10. Individual mean plausibility cutoffs for foods and beverages**

| Dietary Factor <sup>1,2</sup> | Age group | Serving Size <sup>3,4</sup> | Serving Size Units | Individual mean minimum serving/day | Individual mean minimum g/day | Individual mean max serving/day | Individual mean max g/day |
|-------------------------------|-----------|-----------------------------|--------------------|-------------------------------------|-------------------------------|---------------------------------|---------------------------|
| Fruits                        | All       | 100                         | grams              | ≤0                                  | ≤0                            | 15                              | 1500                      |
| Non-starchy vegetables        | All       | 100                         | grams              | ≤0                                  | ≤0                            | 10                              | 1000                      |
| Potatoes                      | All       | 150                         | grams              | ≤0                                  | ≤0                            | 10                              | 1500                      |
| Other starchy vegetables      | All       | 150                         | grams              | ≤0                                  | ≤0                            | 10                              | 1500                      |
| Beans/legumes                 | All       | 100                         | grams              | ≤0                                  | ≤0                            | 10                              | 1000                      |
| Nuts/seeds                    | All       | 28                          | grams              | ≤0                                  | ≤0                            | 10                              | 280                       |
| Refined grains                | All       | 50                          | grams              | ≤0                                  | ≤0                            | 15                              | 750                       |
| Whole grains                  | All       | 50                          | grams              | ≤0                                  | ≤0                            | 10                              | 500                       |
| Processed meats               | All       | 50                          | grams              | ≤0                                  | ≤0                            | 10                              | 500                       |
| Unprocessed red meats         | All       | 100                         | grams              | ≤0                                  | ≤0                            | 10                              | 1000                      |
| Seafood                       | All       | 100                         | grams              | ≤0                                  | ≤0                            | 10                              | 1000                      |
| Eggs                          | All       | 55                          | grams              | ≤0                                  | ≤0                            | 10                              | 550                       |
| Cheese                        | All       | 42                          | grams              | ≤0                                  | ≤0                            | 10                              | 420                       |
| Yogurt                        | All       | 245                         | grams              | ≤0                                  | ≤0                            | 10                              | 2450                      |
| Sugar-sweetened beverages     | Children  | 248                         | grams              | ≤0                                  | ≤0                            | 15                              | 3720                      |
|                               | Adults    | 248                         | grams              | ≤0                                  | ≤0                            | 15                              | 3720                      |
| Fruit Juices                  | All       | 248                         | grams              | ≤0                                  | ≤0                            | 10                              | 2480                      |
| Coffee                        | Children  | 1                           | cups               | ≤0                                  | ≤0                            | 15                              | 15                        |
|                               | Adults    | 1                           | cups               | ≤0                                  | ≤0                            | 15                              | 15                        |
| Tea                           | Children  | 1                           | cups               | ≤0                                  | ≤0                            | 15                              | 15                        |
|                               | Adults    | 1                           | cups               | ≤0                                  | ≤0                            | 15                              | 15                        |
| Reduced fat milk              | All       | 245                         | grams              | ≤0                                  | ≤0                            | 10                              | 2450                      |
| Whole fat milk                | All       | 245                         | grams              | ≤0                                  | ≤0                            | 10                              | 2450                      |
| Total Milk                    | All       | 245                         | grams              | ≤0                                  | ≤0                            | 10                              | 2450                      |

1. The optimal unit for all dietary factors, except coffee and tea, is energy-adjusted grams/day. For coffee and tea the optimal unit is energy adjusted cups/day
2. Unless indicated, all plausibility values apply to all age groups. The children category includes ages 14 years and below.
3. Serving sizes were calculated by searching the USDA Nutrient Database for serving sizes of the most common types of each dietary factor. These values were then averaged together to estimate an overall serving size.
4. Recommended intakes are based off the US 2015-2020 Dietary Guidelines and were extracted from <http://www.choosemyplate.gov/MyPlate> (11). These values are appropriate for individuals with moderate caloric intake (2000 kcal) and less than 30 minutes per day of moderate physical activity.

**Table S11. Group mean plausibility cutoffs for macronutrients**

| Dietary Factor <sup>1</sup>       | GDD unit                         | Group Adult Mean min. | Group Adult Mean max. | Group Child Mean min. <sup>2</sup> | Group Child Mean max. |
|-----------------------------------|----------------------------------|-----------------------|-----------------------|------------------------------------|-----------------------|
| Energy                            | kcal/day                         | ≤1000                 | ≥4000                 | ≤400                               | ≥3000                 |
| Carbohydrate                      | % kcal                           | ≤25                   | ≥80                   | ≤25                                | ≥80                   |
| Total Protein                     | % kcal                           | ≤5                    | ≥30                   | ≤5                                 | ≥30                   |
| Total Protein cont. <sup>3</sup>  | g/day (based off 2000 kcal diet) | ≤25                   | ≥150                  | ≤25                                | ≥150                  |
| Animal Protein                    | % kcal                           | 0                     | ≥30                   | 0                                  | ≥30                   |
| Animal Protein cont. <sup>3</sup> | g/day (based off 2000 kcal diet) | ≤0                    | ≥150                  | ≤0                                 | ≥150                  |
| Plant Protein                     | % kcal                           | 0                     | ≥20                   | 0                                  | ≥20                   |
| Plant Protein, cont <sup>3</sup>  | g/day (based off 2000 kcal diet) | ≤10                   | ≥150                  | ≤10                                | ≥150                  |
| Saturated Fat                     | % kcal                           | 0                     | ≥40                   | 0                                  | ≥35                   |
| Monounsaturated fat               | % kcal                           | ≤5                    | ≥30                   | ≤3                                 | ≥30                   |
| Omega 6 Fat                       | % kcal                           | ≤1                    | ≥20                   | ≤1                                 | ≥20                   |
| Seafood Omega 3 Fat               | mg/day                           | ≤0                    | ≥4000                 | ≤0                                 | ≥400                  |
| Plant Omega 3                     | mg/day                           | ≤200                  | ≥6000                 | ≤300                               | ≥4000                 |
| Trans fat                         | % kcal                           | ≤0                    | ≥15                   | ≤0                                 | ≥8                    |
| Dietary Cholesterol               | mg/day                           | ≤50                   | ≥1000                 | <50                                | ≥800                  |
| Dietary Fiber                     | g/day                            | ≤5                    | ≥60                   | ≤5                                 | ≥40                   |
| Added Sugar                       | % kcal                           | ≤5                    | >45                   | ≤5                                 | >45                   |

1. Maximum values were defined using observed population intakes and dietary recommendations (11-34).
2. Child category includes ages 14 and below.
3. Protein gram estimates are based on 2000 kcal diet and the knowledge that 1 gram of protein contain 4 kcal.

**Table S12. Individual mean plausibility cutoffs for macronutrients**

| Dietary Factor <sup>1</sup>       | GDD unit                         | Individual Mean min. | Individual Adult Mean max. | Individual Child Mean max. <sup>2</sup> |
|-----------------------------------|----------------------------------|----------------------|----------------------------|-----------------------------------------|
| Energy                            | kcal/day                         | ≤500                 | ≥8000                      | ≥4000                                   |
| Carbohydrate                      | % kcal                           | ≤15                  | ≥80                        | ≥80                                     |
| Total Protein                     | % kcal                           | ≤3                   | ≥40                        | ≥40                                     |
| Total Protein cont. <sup>3</sup>  | g/day (based off 2000 kcal diet) | ≤15                  | ≥200                       | ≥200                                    |
| Animal Protein                    | % kcal                           | <0                   | ≥40                        | ≥40                                     |
| Animal Protein cont. <sup>3</sup> | g/day (based off 2000 kcal diet) | ≤0                   | ≥200                       | ≥200                                    |
| Plant Protein                     | % kcal                           | 0                    | ≥30                        | ≥30                                     |
| Plant Protein, cont <sup>3</sup>  | g/day (based off 2000 kcal diet) | ≤0                   | ≥150                       | ≥150                                    |
| Saturated Fat                     | % kcal                           | ≤3                   | ≥50                        | ≥45                                     |
| Monounsaturated fat               | % kcal                           | ≤5                   | ≥40                        | ≥35                                     |
| Omega 6 Fat                       | % kcal                           | ≤1                   | ≥50                        | ≥40                                     |
| Seafood Omega 3 Fat               | mg/day                           | ≤0                   | ≥2500                      | ≥1000                                   |
| Plant Omega 3                     | mg/day                           | ≤0                   | ≥6000                      | ≥4000                                   |
| Trans fat                         | % kcal                           | ≤0                   | ≥20                        | ≥15                                     |
| Dietary Cholesterol               | mg/day                           | ≤25                  | ≥3000                      | ≥1500                                   |
| Dietary Fiber                     | g/day                            | ≤0                   | ≥150                       | ≥80                                     |
| Added Sugar                       | % kcal                           | ≤0%                  | >60                        | >60                                     |

1. Maximum values were defined using observed population intakes and dietary recommendations (11-34).
2. Child category includes ages 14 and below.
3. Protein gram estimates are based on 2000kcal diet and the knowledge that 1 gram of protein contain 4 kcal.

**Table S13. Group mean plausibility cutoffs for micronutrients**

| Dietary Factor <sup>1</sup> | GDD unit   | Group Adult Mean min. | Group Adult Mean max. | Group Child Mean min. <sup>2</sup> | Group Child Mean max. |
|-----------------------------|------------|-----------------------|-----------------------|------------------------------------|-----------------------|
| Calcium                     | mg/day     | ≤300                  | ≥3000                 | ≤100                               | ≥1500                 |
| Sodium                      | mg/day     | ≤500                  | ≥9000                 | ≤500                               | ≥3000                 |
| Iodine                      | ug/day     | ≤30                   | ≥800                  | ≤20                                | ≥150                  |
| Iron                        | mg/day     | ≤5                    | ≥40                   | ≤2                                 | ≥30                   |
| Magnesium                   | mg/day     | ≤100                  | ≥700                  | ≤25                                | ≥400                  |
| Potassium                   | mg/day     | ≤1000                 | ≥8000                 | ≤500                               | ≥6000                 |
| Selenium                    | ug/day     | ≤15                   | ≥300                  | ≤8                                 | ≥80                   |
| Vit. A with supplement      | ug RAE/day | ≤400                  | ≥5000                 | ≤200                               | ≥1500                 |
| Vit. A without supplement   | ug RAE/day | ≤200                  | ≥3000                 | ≤50                                | ≥600                  |
| Vitamin B1                  | mg/day     | ≤0.5                  | ≥4                    | ≤0.25                              | ≥2                    |
| Vitamin B2                  | mg/day     | ≤0.5                  | ≥5                    | ≤0.25                              | ≥2                    |
| Vitamin B3                  | mg/day     | ≤5                    | ≥60                   | ≤2                                 | ≥30                   |
| Vitamin B6                  | mg/day     | ≤0.5                  | ≥5                    | ≤0.25                              | ≥2                    |
| Vitamin B9 (Folate)         | ug/day     | ≤100                  | ≥1000                 | ≤50                                | ≥500                  |
| Vitamin B12                 | ug/day     | ≤1                    | ≥15                   | ≤0.5                               | ≥10                   |
| Vitamin C                   | mg/day     | ≤25                   | ≥400                  | ≤10                                | ≥125                  |
| Vitamin D                   | ug/day     | ≤1                    | ≥50                   | ≤1                                 | ≥25                   |
| Vitamin E                   | mg/day     | ≤3                    | ≥30                   | ≤1                                 | ≥15                   |
| Zinc                        | mg/day     | ≤3                    | ≥50                   | ≤1                                 | ≥25                   |

1. Maximum values were defined using observed population intakes and dietary recommendations (11-34).
2. Child category includes ages 14 and below.

**Table S14. Individual mean plausibility cutoffs for micronutrients**

| Dietary Factor <sup>1</sup> | GDD unit   | Individual Adult Mean min. | Individual Adult Mean max. | Individual Child Mean max. <sup>2</sup> |
|-----------------------------|------------|----------------------------|----------------------------|-----------------------------------------|
| Calcium                     | mg/day     | ≤15                        | ≥4000                      | ≥3500                                   |
| Sodium                      | mg/day     | ≤500                       | ≥12000                     | ≥5000                                   |
| Iodine                      | ug/day     | ≤15                        | ≥1100                      | ≥200                                    |
| Iron                        | mg/day     | ≤2                         | ≥150                       | ≥75                                     |
| Magnesium                   | mg/day     | ≤10                        | ≥1000                      | ≥800                                    |
| Potassium                   | mg/day     | ≤250                       | ≥15000                     | ≥10000                                  |
| Selenium                    | ug/day     | ≤5                         | ≥900                       | ≥200                                    |
| Vit. A with supplement      | ug RAE/day | ≤200                       | ≥15000                     | ≥3000                                   |
| Vit. A without supplement   | ug RAE/day | ≤25                        | ≥10000                     | ≥1000                                   |
| Vitamin B1                  | mg/day     | ≤0.2                       | ≥15                        | ≥5                                      |
| Vitamin B2                  | mg/day     | ≤0.2                       | ≥15                        | ≥5                                      |
| Vitamin B3                  | mg/day     | ≤1                         | ≥120                       | ≥80                                     |
| Vitamin B6                  | mg/day     | ≤0.2                       | ≥20                        | ≥6                                      |
| Vitamin B9 (Folate)         | ug/day     | ≤25                        | ≥2000                      | ≥1000                                   |
| Vitamin B12                 | ug/day     | ≤0.5                       | ≥200                       | ≥50                                     |
| Vitamin C                   | mg/day     | ≤5                         | ≥2500                      | ≥600                                    |
| Vitamin D                   | ug/day     | ≤0.5                       | ≥200                       | ≥100                                    |
| Vitamin E                   | mg/day     | ≤0.25                      | ≥250                       | ≥50                                     |
| Zinc                        | mg/day     | ≤0.5                       | ≥100                       | ≥50                                     |

1. Maximum values were defined using observed population intakes and dietary recommendations (11-34).
2. Child category includes ages 14 and below.

**Text S4. Global Population Represented**

We estimated the percent of the global population represented by our surveys using the United Nations Population Database global and national population estimates. The 188 countries for which dietary surveys were available (1,220 surveys collected between 1980 and 2015) represented 99.0% of the world's population in 2015. Surveys collected between 1980 and 1999 represented 87.7% of the world's population in 1999, while surveys collected between 2000 and 2015 represented 98.5% of the world's population in 2015.



**Table S15. Characteristics of 1,220 dietary surveys in the GDD 2017 by dietary assessment method.**

| Survey characteristics                                                                                        | Overall         | Dietary Recall  | FFQ             | DHS Questionnaire | Biomarker      | Household survey |
|---------------------------------------------------------------------------------------------------------------|-----------------|-----------------|-----------------|-------------------|----------------|------------------|
| Surveys included <sup>1</sup> , n                                                                             | 1,220           | 286             | 503             | 193               | 160            | 78               |
| Number of countries represented, n                                                                            | 188             | 68              | 164             | 70                | 60             | 27               |
| Percent of the global population represented in 2015, %                                                       | 99.0            | 75.2            | 93.4            | 53.4              | 70.0           | 15.0             |
| Demographic characteristics reported by surveys <sup>2</sup>                                                  |                 |                 |                 |                   |                |                  |
| Children/adolescents (ages 0 - 19 years), %                                                                   | 73.9            | 67.1            | 84.9            | 99.5              | 8.8            | 98.8             |
| Age 0 - 0.49                                                                                                  | 26.3            | 14.0            | 1.4             | 97.9              | 8.8            | 96.2             |
| Age 0.5 - 0.99                                                                                                | 26.9            | 15.0            | 1.6             | 97.9              | 6.3            | 96.2             |
| Age 1 - 1.9                                                                                                   | 29.3            | 24.1            | 4.0             | 92.2              | 8.8            | 97.4             |
| Age 2 - 5.9                                                                                                   | 32.5            | 31.8            | 5.2             | 98.4              | 8.8            | 97.4             |
| Age 6 - 10                                                                                                    | 32.0            | 34.6            | 20.9            | 56.0              | 1.3            | 97.4             |
| Age 11 - 14                                                                                                   | 49.8            | 37.1            | 62.4            | 57.0              | 1.3            | 97.4             |
| Age 15 - 19                                                                                                   | 61.2            | 50.7            | 82.1            | 57.0              | 1.3            | 98.7             |
| Adults (ages 20+ years), %                                                                                    | 64.5            | 83.9            | 41.9            | 57.0              | 92.5           | 100.0            |
| Age 20 - 44                                                                                                   | 62.5            | 80.4            | 40.2            | 57.0              | 88.8           | 100.0            |
| Age 45 - 69                                                                                                   | 61.7            | 77.3            | 40.0            | 57.0              | 89.4           | 100.0            |
| Age 70+                                                                                                       | 32.8            | 47.9            | 28.2            | 4.1               | 21.9           | 100.0            |
| Level of educational attainment, %                                                                            | 30.2            | 31.5            | 25.2            | 72.0              | 7.5            | 0.0              |
| Urban vs. rural residence, %                                                                                  |                 |                 |                 |                   |                |                  |
| Both urban and rural                                                                                          | 52.2            | 20.6            | 74.0            | 100.0             | 8.1            | 0.0              |
| Urban only                                                                                                    | 4.7             | 9.1             | 5.8             | 0.0               | 1.3            | 0.0              |
| Rural only                                                                                                    | 1.4             | 3.1             | 1.6             | 0.0               | 0.0            | 0.0              |
| Information not available                                                                                     | 41.7            | 67.1            | 18.7            | 0.0               | 90.6           | 100.0            |
| Pregnancy/lactation status of women, %                                                                        | 11.2            | 0.3             | 1.0             | 65.3              | 3.1            | 0.0              |
| Year of data collection, %                                                                                    |                 |                 |                 |                   |                |                  |
| 1980 to 1999                                                                                                  | 36.1            | 41.6            | 20.1            | 27.8              | 71.3           | 66.7             |
| 2000 to 2015                                                                                                  | 63.9            | 58.4            | 79.9            | 72.0              | 28.8           | 33.3             |
| Representativeness                                                                                            |                 |                 |                 |                   |                |                  |
| National, No. surveys (% of total)                                                                            | 880 (72.1)      | 182 (63.6)      | 401 (79.7)      | 193 (100.0)       | 26 (16.3)      | 78 (100.0)       |
| Subnational, No. surveys (% of total)                                                                         | 207 (17.0)      | 44 (15.4)       | 66 (13.1)       | 0 (0.0)           | 97 (60.6)      | 0 (0.0)          |
| Community, No. surveys (% of total)                                                                           | 133 (10.9)      | 60 (21.0)       | 36 (7.2)        | 0 (0.0)           | 37 (23.1)      | 0 (0.0)          |
| Response rate, %                                                                                              |                 |                 |                 |                   |                |                  |
| 60 to 100%                                                                                                    | 37.8            | 48.6            | 22.9            | 80.8              | 8.8            | 47.4             |
| 20 to 59%                                                                                                     | 3.2             | 7.7             | 1.4             | 0.0               | 0.0            | 12.8             |
| < 20 %                                                                                                        | 5.7             | 0.0             | 13.5            | 0.0               | 0.0            | 1.3              |
| Information not available                                                                                     | 53.4            | 43.7            | 62.2            | 19.2              | 91.3           | 38.5             |
| Sampling methodology, %                                                                                       |                 |                 |                 |                   |                |                  |
| Probability sampling, with survey weights                                                                     | 38.4            | 32.5            | 31.2            | 84.5              | 7.5            | 56.4             |
| Probability sampling, no survey weights                                                                       | 32.7            | 26.6            | 54.7            | 15.0              | 1.3            | 21.8             |
| Non-probability sampling                                                                                      | 4.2             | 6.3             | 5.2             | 0.05              | 0.6            | 7.7              |
| Information not available                                                                                     | 24.7            | 34.6            | 8.9             |                   | 90.6           | 14.1             |
| Median (5 <sup>th</sup> , 95 <sup>th</sup> percentile) no. of GDD dietary food groups per survey <sup>3</sup> | 6.0 (1.0, 30.0) | 9.0 (1.0, 46.5) | 3.0 (2.0, 29.9) | 9.0 (2.0, 13.0)   | 1.0 (0.0, 1.0) | 13.0 (1.0, 15.0) |
| Data type <sup>4</sup> , %                                                                                    |                 |                 |                 |                   |                |                  |
| Individual-level microdata                                                                                    | 58.6            | 31.1            | 80.5            | 100.0             | 90.6           | 16.7             |
| Aggregated stratum-level distributions                                                                        | 41.4            | 68.9            | 19.5            | 0.0               | 9.4            | 83.3             |
| Level of data collection, %                                                                                   |                 |                 |                 |                   |                |                  |
| Individual-level                                                                                              | 92.5            | 95.1            | 99.6            | 99.5              | 100.0          | 5.1              |
| Household-level                                                                                               | 5.7             | 0.7             | 0.2             | 0.0               | 0.0            | 85.9             |
| Information not available                                                                                     | 1.7             | 4.2             | 0.2             | 0.5               | 0.0            | 9.0              |
| Data source, %                                                                                                |                 |                 |                 |                   |                |                  |

|                              |            |            |            |            |            |            |
|------------------------------|------------|------------|------------|------------|------------|------------|
| Contributed by data owner    | 356 (29.4) | 190 (66.4) | 157 (31.2) | 3 (1.6)    | 6 (3.8)    | 0 (0.0)    |
| Retrieved from public source | 864 (70.6) | 96 (33.6)  | 346 (68.8) | 190 (98.4) | 154 (96.3) | 78 (100.0) |

<sup>1</sup>Each survey count represents a country-specific survey-year. When data collection for a single survey was performed over multiple years, the median survey year was used (or first year if two years).

<sup>2</sup>Because data on children/adolescents (0-19 years), urban/rural residence, education, pregnancy/lactation, and response rate were not collected in GDD 2010 (41.7% of total surveys), these percentages may underestimate available data in these surveys. Values are shown for surveys including data on that subgroup and may sum to greater than 100% because a survey can include multiple subgroups.

<sup>3</sup>Based on the food groups collected in GDD 2010 (up to 21, 41.7% of surveys) and GDD 2017 (up to 54, 58.3% of surveys), not including biomarker surveys.

<sup>4</sup>Individual-level microdata represent individual level data in possession of the GDD. Aggregated stratum-level distributions are based on individual-level data aggregated by data owners in standardized subgroups jointly stratified by age, sex, education, and urban/rural residence, and pregnancy/lactation status, as available; and provided to the GDD including stratum-specific means, standard deviations, and percentiles of intake. Nearly all (94.2%) surveys collected in 2014-2020 (GDD 2017 round of data collection) were individual-level microdata.

**Table S16. Frequency (%) of dietary factors by dietary assessment method.**

| No. GDD dietary factors | Single or multiple dietary recall (n=286) | FFQ (n=503) |
|-------------------------|-------------------------------------------|-------------|
| 54                      | 0 (0.0)                                   | 0 (0.0)     |
| ≥50                     | 5 (1.7)                                   | 7 (1.4)     |
| ≥45                     | 18 (6.3)                                  | 12 (2.4)    |
| ≥40                     | 21 (7.3)                                  | 14 (2.8)    |
| ≥35                     | 27 (9.4)                                  | 17 (3.4)    |
| ≥30                     | 28 (9.8)                                  | 26 (5.2)    |
| ≥25                     | 37 (12.9)                                 | 38 (7.6)    |
| ≥20                     | 64 (22.4)                                 | 47 (9.3)    |
| ≥15                     | 104 (36.4)                                | 61 (12.1)   |
| ≥10                     | 135 (47.2)                                | 82 (16.3)   |
| ≥5                      | 192 (67.1)                                | 164 (32.6)  |
| ≥4                      | 196 (68.5)                                | 186 (37.0)  |
| ≥3                      | 205 (71.7)                                | 353 (70.2)  |
| ≥2                      | 210 (73.4)                                | 492 (97.8)  |

All dietary factors may not have been available for 24-hr recalls or FFQs for several reasons, including: 1) the absence of reliable and updated national food composition databases or food composition tables to estimate nutrients; 2) the food, beverage, or nutrient may not be regularly consumed by the survey population; 3) the survey was identified and standardized for GDD 2010 when we were only collecting data on 21 of the 54 dietary factors; 4) the data was extracted directly from published papers and the data owners did not consent to provide more detailed individual-level microdata or aggregate stratum-level data; and 5) the data owner chose to provide a subset of available dietary data.

A.

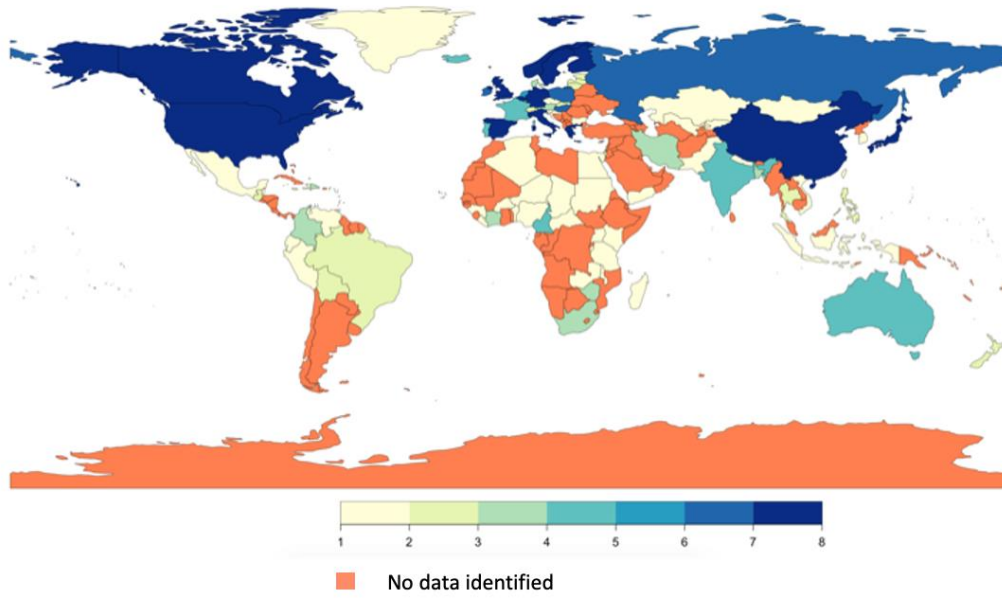

B.

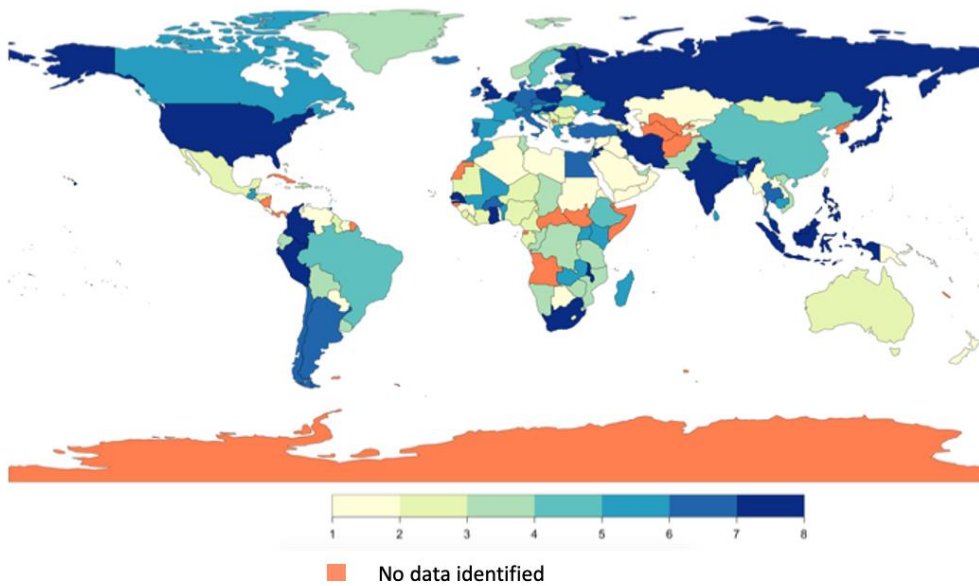

Figure S1. Geographic density of the number of dietary surveys in the GDD 2017 by country, including surveys collected between 1980 to 1999 (panel A) and 2000 to 2015 (panel B).

**Table S17. Data sharing agreements for public and corresponding member (CM) surveys.**

|               | Signed Data Sharing Agreement | No Data Sharing Agreement | Total |
|---------------|-------------------------------|---------------------------|-------|
| CM survey     | 135                           | 221                       | 356   |
| Public survey | 864                           | 0                         | 864   |

Data from surveys with signed data sharing agreements will be available for download from [www.globaldietarydatabase.org](http://www.globaldietarydatabase.org).  
When available, original dietary survey data are provided as both unadjusted and energy-adjusted intakes.

Table S18. Characteristics of surveys included in the Global Dietary Database.

| Data Collection Round | Survey Name                                                                                                                    | Year Survey Began | Year Survey Ended | Country             | Residence                | Sample Size | Youngest Age | Oldest Age | Male Subjects | Female Subjects | Diet Assessment Method | Representativeness            |
|-----------------------|--------------------------------------------------------------------------------------------------------------------------------|-------------------|-------------------|---------------------|--------------------------|-------------|--------------|------------|---------------|-----------------|------------------------|-------------------------------|
| GDD 2017              | DHS V                                                                                                                          | 2008              | 2009              | Albania             | Both urban and rural     | 16638       | 0            | 98         | Yes           | Yes             | DHS questionnaire      | Nationally representative     |
| GDD 2017              | Global Student Based Student Health Survey 2011                                                                                | 2011              | 2011              | Algeria             | Both urban and rural     | 4451        | 11           | 16         | Yes           | Yes             | FFQ                    | Nationally representative     |
| GDD 2010              | Multi-centre study of the Mediterranean Group for the Study of Diabetes (MGSD)                                                 | 1995              |                   | Algeria             | Information not reported | 100         | 35           | 60         | Yes           | Yes             | FFQ                    | Sub-nationally representative |
| GDD 2010              | Multi-centre study of the Mediterranean Group for the Study of Diabetes (MGSD)                                                 | 1995              |                   | Algeria             | Information not reported | 250         | 24           | 74         | Yes           | Yes             | FFQ                    | Sub-nationally representative |
| GDD 2010              | Mesure des facteurs de risque des maladies non transmissibles dans deux zones pilotes (approche STEPWISE) Algérie 2003-Rapport | 2003              | 2003              | Algeria             | Information not reported | 1000        | 25           | 64         | Yes           | Yes             | FFQ                    | Nationally representative     |
| GDD 2010              | American Samoa 1990 24 hr recall diet estimates                                                                                | 1990              | 1990              | American Samoa      | Information not reported | 250         | 25           | 55         | Yes           | Yes             | Single 24-hour recall  | Nationally representative     |
| GDD 2010              | American Samoa NCD Risk Factors STEPS Report                                                                                   | 2004              | 2004              | American Samoa      | Information not reported | 1000        | 25           | 64         | Yes           | Yes             | FFQ                    | Nationally representative     |
| GDD 2017              | Demographic and Health Survey Angola 2011                                                                                      | 2011              | 2011              | Angola              | Both urban and rural     | 2888        | 0            | 4          | Yes           | Yes             | Biomarker              | Nationally representative     |
| GDD 2017              | Global Student Based Student Health Survey 2009                                                                                | 2009              | 2009              | Anguilla            | Both urban and rural     | 937         | 11           | 16         | Yes           | Yes             | FFQ                    | Nationally representative     |
| GDD 2017              | Global Student Based Student Health Survey 2009                                                                                | 2009              | 2009              | Antigua And Barbuda | Both urban and rural     | 1220        | 11           | 16         | Yes           | Yes             | FFQ                    | Nationally representative     |
| GDD 2017              | Primer estudio sobre el estado nutricional y los hábitos alimentarios de la población adulta de Rosario                        | 2012              | 2013              | Argentina           | Only urban               | 1200        | 15           | 75         | Yes           | Yes             | Single 24-hour recall  | Locally representative        |

|          |                                                                                        |      |      |           |                          |       |    |     |     |     |                         |                               |
|----------|----------------------------------------------------------------------------------------|------|------|-----------|--------------------------|-------|----|-----|-----|-----|-------------------------|-------------------------------|
| GDD 2017 | Encuesta Alimentaria y Nutricional de la Ciudad de Buenos Aires                        | 2011 | 2011 | Argentina | Only urban               | 5365  | 1  | 100 | Yes | Yes | Multiple 24-hour recall | Sub-nationally representative |
| GDD 2017 | Nutritional status of school-aged children of Buenos Aires                             | 2005 | 2005 | Argentina | Only urban               | 1588  | 9  | 11  | Yes | Yes | FFQ                     | Locally representative        |
| GDD 2017 | Acute and long term consequences of RSV infection in children                          | 2011 | 2019 | Argentina | Only urban               | 1316  | 11 | 55  | No  | Yes | FFQ                     | Sub-nationally representative |
| GDD 2017 | Global Student Based Student Health Survey 2007                                        | 2007 | 2007 | Argentina | Both urban and rural     | 1926  | 11 | 16  | Yes | Yes | FFQ                     | Nationally representative     |
| GDD 2017 | Global Student Based Student Health Survey 2012                                        | 2012 | 2012 | Argentina | Both urban and rural     | 27748 | 11 | 16  | Yes | Yes | FFQ                     | Nationally representative     |
| GDD 2010 | Encuesta Nacional de Nutrición y Salud - National Nutrition and Health Survey (ENNyS)  | 2004 | 2005 | Argentina | Information not reported | 1000  | 20 | 49  | No  | Yes | Single 24-hour recall   | Nationally representative     |
| GDD 2010 | INTERSALT, Buenos Aires                                                                | 1985 | 1987 | Argentina | Information not reported | 25    | 20 | 59  | Yes | Yes | Biomarker               | Locally representative        |
| GDD 2017 | Health Behavior in School-Aged Children 2010                                           | 2010 | 2010 | Armenia   | Both urban and rural     | 2749  | 11 | 15  | Yes | Yes | FFQ                     | Nationally representative     |
| GDD 2017 | Demographic and Health Survey Armenia 2005                                             | 2005 | 2005 | Armenia   | Both urban and rural     | 7501  | 0  | 49  | Yes | Yes | DHS questionnaire       | Nationally representative     |
| GDD 2010 | Living Conditions Lifestyles and Health in the Communities of Independent States (CIS) | 2001 | 2002 | Armenia   | Information not reported | 1000  | 18 | 99  | Yes | Yes | FFQ                     | Nationally representative     |
| GDD 2010 | National Nutrition Survey                                                              | 1995 | 1995 | Australia | Information not reported | 1000  | 0  | 100 | Yes | Yes | Single 24-hour recall   | Nationally representative     |
| GDD 2010 | National Nutrition Survey                                                              | 1995 | 1996 | Australia | Information not reported | 1000  | 0  | 100 | Yes | Yes | Single 24-hour recall   | Nationally representative     |
| GDD 2010 | Beard et al.                                                                           | 1995 | 1995 | Australia | Information not reported | 87    | 20 | 70  | Yes | Yes | Biomarker               | Sub-nationally representative |
| GDD 2010 | Beard et al.                                                                           | 1989 | 1989 | Australia | Information not reported | 22    | 24 | 69  | Yes | Yes | Biomarker               | Sub-nationally representative |
| GDD 2010 | Notowidjojo et al.                                                                     | 1992 | 1992 | Australia | Information not reported | 64    | 20 | 64  | Yes | Yes | Biomarker               | Sub-nationally representative |
| GDD 2010 | Land et al.                                                                            | 2011 | 2011 | Australia | Information not reported | 15    | 20 | 88  | Yes | Yes | Biomarker               | Sub-nationally representative |

|          |                                                                                   |      |      |            |                                 |       |    |     |     |     |                                             |                                      |
|----------|-----------------------------------------------------------------------------------|------|------|------------|---------------------------------|-------|----|-----|-----|-----|---------------------------------------------|--------------------------------------|
| GDD 2010 | Charlton et al.                                                                   | 2007 | 2007 | Australia  | <i>Information not reported</i> | 78    | 20 | 56  | No  | Yes | <i>Biomarker</i>                            | <i>Locally representative</i>        |
| GDD 2010 | Margerison                                                                        | 2003 | 2003 | Australia  | <i>Information not reported</i> | 79    | 30 | 74  | Yes | Yes | <i>Biomarker</i>                            | <i>Sub-nationally representative</i> |
| GDD 2017 | Austrian Study of Nutritional Status                                              | 2010 | 2012 | Austria    | <i>Both urban and rural</i>     | 889   | 6  | 81  | Yes | Yes | <i>FFQ</i>                                  | <i>Nationally representative</i>     |
| GDD 2017 | Health Behavior in School-Aged Children 1990                                      | 1989 | 1990 | Austria    | <i>Both urban and rural</i>     | 2930  | 10 | 16  | Yes | Yes | <i>FFQ</i>                                  | <i>Nationally representative</i>     |
| GDD 2017 | Health Behavior in School-Aged Children 1994                                      | 1993 | 1994 | Austria    | <i>Both urban and rural</i>     | 5217  | 10 | 16  | Yes | Yes | <i>FFQ</i>                                  | <i>Nationally representative</i>     |
| GDD 2017 | Health Behavior in School-Aged Children 1998                                      | 1998 | 1998 | Austria    | <i>Both urban and rural</i>     | 4286  | 10 | 16  | Yes | Yes | <i>FFQ</i>                                  | <i>Nationally representative</i>     |
| GDD 2017 | Health Behavior in School-Aged Children 2002                                      | 2001 | 2002 | Austria    | <i>Both urban and rural</i>     | 4366  | 10 | 16  | Yes | Yes | <i>FFQ</i>                                  | <i>Nationally representative</i>     |
| GDD 2017 | Health Behavior in School-Aged Children 2006                                      | 2006 | 2006 | Austria    | <i>Both urban and rural</i>     | 4771  | 11 | 15  | Yes | Yes | <i>FFQ</i>                                  | <i>Nationally representative</i>     |
| GDD 2017 | Health Behavior in School-Aged Children 2010                                      | 2010 | 2010 | Austria    | <i>Both urban and rural</i>     | 4983  | 11 | 15  | Yes | Yes | <i>FFQ</i>                                  | <i>Nationally representative</i>     |
| GDD 2010 | Austrian Community Health and Nutrition Survey                                    | 1999 | 1999 | Austria    | <i>Information not reported</i> | 1000  | 0  | 100 | Yes | Yes | <i>Household availability/budget survey</i> | <i>Nationally representative</i>     |
| GDD 2010 | Austrian Study on Nutritional Status                                              | 2005 | 2006 | Austria    | <i>Information not reported</i> | 1000  | 19 | 64  | Yes | Yes | <i>Single 24-hour recall</i>                | <i>Nationally representative</i>     |
| GDD 2010 | Austrian Study on Nutritional Status 2007                                         | 2007 | 2007 | Austria    | <i>Information not reported</i> | 1000  | 7  | 100 | Yes | Yes | <i>Single 24-hour recall</i>                | <i>Nationally representative</i>     |
| GDD 2017 | Demographic and Health Survey Azerbaijan 2006                                     | 2006 | 2006 | Azerbaijan | <i>Both urban and rural</i>     | 10307 | 0  | 49  | Yes | Yes | <i>DHS questionnaire</i>                    | <i>Nationally representative</i>     |
| GDD 2017 | Global Student Based Student Health Survey 2013                                   | 2013 | 2013 | Bahamas    | <i>Both urban and rural</i>     | 1349  | 7  | 16  | Yes | Yes | <i>FFQ</i>                                  | <i>Nationally representative</i>     |
| GDD 2010 | Health Status, Lifestyle and Nutrition Intake of Home Resident Elderly in Bahrain | 1992 | 1992 | Bahrain    | <i>Information not reported</i> | 100   | 65 | 90  | Yes | Yes | <i>Single 24-hour recall</i>                | <i>Nationally representative</i>     |



|          |                                                                                                                   |      |      |            |                          |       |    |     |     |     |                         |                               |
|----------|-------------------------------------------------------------------------------------------------------------------|------|------|------------|--------------------------|-------|----|-----|-----|-----|-------------------------|-------------------------------|
| GDD 2010 | Assessment of Iron Status and Dietary Intake of Pregnant Women in Bahrain                                         | 1995 | 1995 | Bahrain    | Information not reported | 500   | 20 | 45  | No  | Yes | Single 24-hour recall   | Nationally representative     |
| GDD 2010 | National Nutrition Survey                                                                                         | 2000 | 2000 | Bahrain    | Information not reported | 1000  | 19 | 70  | Yes | Yes | Single 24-hour recall   | Nationally representative     |
| GDD 2017 | The Health Effects of As Longitudinal Study (HEALS)                                                               | 2000 | 2002 | Bangladesh | Only rural               | 19596 | 17 | 75  | Yes | Yes | FFQ                     | Locally representative        |
| GDD 2017 | HarvestPlus Baseline Dietary Survey                                                                               | 2007 | 2008 | Bangladesh | Only rural               | 1839  | 2  | 70  | Yes | Yes | Multiple 24-hour recall | Locally representative        |
| GDD 2017 | Demographic and Health Survey Bangladesh IV 1999-2000                                                             | 1999 | 2000 | Bangladesh | Both urban and rural     | 4917  | 0  | 4   | Yes | Yes | DHS questionnaire       | Nationally representative     |
| GDD 2017 | Demographic and Health Survey Bangladesh IV 2004                                                                  | 2004 | 2004 | Bangladesh | Both urban and rural     | 6365  | 0  | 4   | Yes | Yes | DHS questionnaire       | Nationally representative     |
| GDD 2017 | Demographic and Health Survey Bangladesh V 2007                                                                   | 2007 | 2007 | Bangladesh | Both urban and rural     | 4201  | 0  | 4   | Yes | Yes | DHS questionnaire       | Nationally representative     |
| GDD 2017 | Demographic and Health Survey Bangladesh VI 2011                                                                  | 2011 | 2011 | Bangladesh | Both urban and rural     | 11065 | 0  | 49  | Yes | Yes | DHS questionnaire       | Nationally representative     |
| GDD 2017 | Demographic and Health Survey Bangladesh VII 2014                                                                 | 2014 | 2014 | Bangladesh | Both urban and rural     | 3623  | 0  | 4   | Yes | Yes | DHS questionnaire       | Nationally representative     |
| GDD 2017 | Bangladesh World Health Survey 2003                                                                               | 2003 | 2003 | Bangladesh | Both urban and rural     | 5512  | 18 | 110 | Yes | Yes | FFQ                     | Nationally representative     |
| GDD 2017 | Demographic and Health Survey Bangladesh 1993                                                                     | 1993 | 1994 | Bangladesh | Both urban and rural     | 3014  | 0  | 2   | Yes | Yes | DHS questionnaire       | Nationally representative     |
| GDD 2017 | Demographic and Health Survey Bangladesh 1996                                                                     | 1996 | 1997 | Bangladesh | Both urban and rural     | 4313  | 0  | 4   | Yes | Yes | DHS questionnaire       | Nationally representative     |
| GDD 2010 | Dietary Diversity as a Measure of the Micronutrient Adequacy of Women's Diets: Results from Rural Bangladesh Site | 1996 | 1996 | Bangladesh | Information not reported | 250   | 15 | 49  | No  | Yes | Single 24-hour recall   | Sub-nationally representative |
| GDD 2017 | Global Student Based Student Health Survey 2011                                                                   | 2011 | 2011 | Barbados   | Both urban and rural     | 1618  | 11 | 16  | Yes | Yes | FFQ                     | Nationally representative     |

|          |                                                                                                                                   |      |      |          |                                 |       |    |     |     |     |                         |                                      |
|----------|-----------------------------------------------------------------------------------------------------------------------------------|------|------|----------|---------------------------------|-------|----|-----|-----|-----|-------------------------|--------------------------------------|
| GDD 2010 | Identifying new genetic and obesity-related factors contributing to prostate and breast cancer risk in persons of African descent | 2004 | 2007 | Barbados | <i>Information not reported</i> | 250   | 31 | 88  | Yes | Yes | FFQ                     | <i>Nationally representative</i>     |
| GDD 2010 | Barbados STEPS Survey 2007                                                                                                        | 2007 | 2007 | Barbados | <i>Information not reported</i> | 1000  | 25 | 100 | Yes | Yes | FFQ                     | <i>Nationally representative</i>     |
| GDD 2010 | Cooper et al.                                                                                                                     | 1991 | 1994 | Barbados | <i>Information not reported</i> | 813   | 25 | 74  | Yes | Yes | Biomarker               | <i>Sub-nationally representative</i> |
| GDD 2010 | Living Conditions Lifestyles and Health                                                                                           | 2001 | 2002 | Belarus  | <i>Information not reported</i> | 1000  | 18 | 99  | Yes | Yes | FFQ                     | <i>Nationally representative</i>     |
| GDD 2017 | Flanders preschool dietary survey                                                                                                 | 2002 | 2003 | Belgium  | <i>Both urban and rural</i>     | 1983  | 3  | 7   | Yes | Yes | Multiple 24-hour recall | <i>Sub-nationally representative</i> |
| GDD 2017 | Health Behavior in School-Aged Children 1986                                                                                      | 1985 | 1986 | Belgium  | <i>Both urban and rural</i>     | 3575  | 11 | 16  | Yes | Yes | FFQ                     | <i>Nationally representative</i>     |
| GDD 2017 | Health Behavior in School-Aged Children 1990                                                                                      | 1989 | 1990 | Belgium  | <i>Both urban and rural</i>     | 3007  | 11 | 16  | Yes | Yes | FFQ                     | <i>Nationally representative</i>     |
| GDD 2017 | Health Behavior in School-Aged Children 1994                                                                                      | 1993 | 1994 | Belgium  | <i>Both urban and rural</i>     | 5196  | 11 | 16  | Yes | Yes | FFQ                     | <i>Sub-nationally representative</i> |
| GDD 2017 | Health Behavior in School-Aged Children 1994                                                                                      | 1993 | 1994 | Belgium  | <i>Both urban and rural</i>     | 4506  | 11 | 16  | Yes | Yes | FFQ                     | <i>Sub-nationally representative</i> |
| GDD 2017 | Health Behavior in School-Aged Children 1998                                                                                      | 1998 | 1998 | Belgium  | <i>Both urban and rural</i>     | 2505  | 11 | 16  | Yes | Yes | FFQ                     | <i>Sub-nationally representative</i> |
| GDD 2017 | Health Behavior in School-Aged Children 1998                                                                                      | 1998 | 1998 | Belgium  | <i>Both urban and rural</i>     | 4824  | 11 | 16  | Yes | Yes | FFQ                     | <i>Sub-nationally representative</i> |
| GDD 2017 | Health Behavior in School-Aged Children 2002                                                                                      | 2001 | 2002 | Belgium  | <i>Both urban and rural</i>     | 10612 | 11 | 16  | Yes | Yes | FFQ                     | <i>Nationally representative</i>     |
| GDD 2017 | Health Behavior in School-Aged Children 2006                                                                                      | 2006 | 2006 | Belgium  | <i>Both urban and rural</i>     | 8757  | 11 | 15  | Yes | Yes | FFQ                     | <i>Nationally representative</i>     |
| GDD 2017 | Health Behavior in School-Aged Children 2010                                                                                      | 2010 | 2010 | Belgium  | <i>Both urban and rural</i>     | 8159  | 11 | 15  | Yes | Yes | FFQ                     | <i>Nationally representative</i>     |
| GDD 2010 | Belgian Community Health and Nutrition Survey                                                                                     | 1987 | 1988 | Belgium  | <i>Information not reported</i> | 1000  | 0  | 100 | Yes | Yes | Household availability/ | <i>Nationally representative</i>     |

|          |                                                 |      |      |         |                                 |      |    |     |     |     |                                              |                                      |
|----------|-------------------------------------------------|------|------|---------|---------------------------------|------|----|-----|-----|-----|----------------------------------------------|--------------------------------------|
|          |                                                 |      |      |         |                                 |      |    |     |     |     | <i>budget survey</i>                         |                                      |
| GDD 2010 | Belgian Community Health and Nutrition Survey   | 1996 | 1997 | Belgium | <i>Information not reported</i> | 1000 | 0  | 100 | Yes | Yes | <i>Household availability/ budget survey</i> | <i>Nationally representative</i>     |
| GDD 2010 | Belgian Community Health and Nutrition Survey   | 1999 | 1999 | Belgium | <i>Information not reported</i> | 1000 | 0  | 100 | Yes | Yes | <i>Household availability/ budget survey</i> | <i>Nationally representative</i>     |
| GDD 2010 | Belgian National Food Consumption Survey        | 2004 | 2004 | Belgium | <i>Information not reported</i> | 1000 | 15 | 100 | Yes | Yes | <i>Multiple 24-hour recall</i>               | <i>Nationally representative</i>     |
| GDD 2010 | Belgian National Food Consumption Survey        | 2004 | 2004 | Belgium | <i>Information not reported</i> | 1000 | 15 | 100 | Yes | Yes | <i>Multiple 24-hour recall</i>               | <i>Nationally representative</i>     |
| GDD 2010 | TRANSFAIR study                                 | 1991 | 1992 | Belgium | <i>Information not reported</i> | 250  | 18 | 65  | Yes | Yes | <i>Single 24-hour recall</i>                 | <i>Nationally representative</i>     |
| GDD 2010 | Staessen et al.                                 | 1980 | 1981 | Belgium | <i>Information not reported</i> | 273  | 20 | 88  | Yes | Yes | <i>Biomarker</i>                             | <i>Sub-nationally representative</i> |
| GDD 2010 | INTERSALT, Charleroi                            | 1985 | 1987 | Belgium | <i>Information not reported</i> | 11   | 20 | 59  | Yes | Yes | <i>Biomarker</i>                             | <i>Sub-nationally representative</i> |
| GDD 2010 | INTERSALT, Ghent                                | 1985 | 1987 | Belgium | <i>Information not reported</i> | 25   | 20 | 59  | Yes | Yes | <i>Biomarker</i>                             | <i>Sub-nationally representative</i> |
| GDD 2010 | Vandevijvere et al.                             | 2007 | 2008 | Belgium | <i>Information not reported</i> | 60   | 25 | 65  | Yes | Yes | <i>Biomarker</i>                             | <i>Sub-nationally representative</i> |
| GDD 2010 | Vandevijvere et al.                             | 2009 | 2009 | Belgium | <i>Information not reported</i> | 66   | 25 | 65  | Yes | Yes | <i>Biomarker</i>                             | <i>Sub-nationally representative</i> |
| GDD 2010 | Zhang et al.                                    | 1997 | 1997 | Belgium | <i>Information not reported</i> | 2124 | 25 | 74  | Yes | Yes | <i>Biomarker</i>                             | <i>Nationally representative</i>     |
| GDD 2010 | Zhang et al.                                    | 1997 | 1997 | Belgium | <i>Information not reported</i> | 2124 | 25 | 74  | Yes | Yes | <i>Single 24-hour recall</i>                 | <i>Sub-nationally representative</i> |
| GDD 2017 | Global Student Based Student Health Survey 2011 | 2011 | 2011 | Belize  | <i>Both urban and rural</i>     | 2084 | 11 | 16  | Yes | Yes | <i>FFQ</i>                                   | <i>Nationally representative</i>     |
| GDD 2010 | Simmons et al.                                  | 1980 | 1980 | Belize  | <i>Information not reported</i> | 392  | 20 | 94  | Yes | No  | <i>Biomarker</i>                             | <i>Locally representative</i>        |
| GDD 2017 | Global Student Based Student Health Survey 2009 | 2009 | 2009 | Benin   | <i>Both urban and rural</i>     | 2664 | 11 | 16  | Yes | Yes | <i>FFQ</i>                                   | <i>Nationally representative</i>     |
| GDD 2017 | Demographic and Health Survey Benin 1996        | 1996 | 1996 | Benin   | <i>Both urban and rural</i>     | 2497 | 0  | 2   | Yes | Yes | <i>DHS questionnaire</i>                     | <i>Nationally representative</i>     |

|          |                                                                                                                                                                                  |      |      |         |                          |       |    |    |     |     |                   |                               |
|----------|----------------------------------------------------------------------------------------------------------------------------------------------------------------------------------|------|------|---------|--------------------------|-------|----|----|-----|-----|-------------------|-------------------------------|
| GDD 2017 | Demographic and Health Survey Benin 2001                                                                                                                                         | 2001 | 2001 | Benin   | Both urban and rural     | 7447  | 0  | 49 | Yes | Yes | DHS questionnaire | Nationally representative     |
| GDD 2017 | Demographic and Health Survey Benin 2006                                                                                                                                         | 2006 | 2006 | Benin   | Both urban and rural     | 18327 | 0  | 49 | Yes | Yes | DHS questionnaire | Nationally representative     |
| GDD 2017 | Demographic and Health Survey Benin 2011-2012                                                                                                                                    | 2011 | 2012 | Benin   | Both urban and rural     | 17646 | 0  | 49 | Yes | Yes | DHS questionnaire | Nationally representative     |
| GDD 2010 | STEP Benin                                                                                                                                                                       | 2007 | 2007 | Benin   | Information not reported | 1000  | 25 | 64 | Yes | Yes | FFQ               | Sub-nationally representative |
| GDD 2010 | RAPPORT FINAL DE L'ENQUETE STEPS AU BENIN                                                                                                                                        | 2008 | 2008 | Benin   | Information not reported | 1000  | 25 | 64 | Yes | Yes | FFQ               | Nationally representative     |
| GDD 2010 | Melse-Boonstra et al. (2 of 4)                                                                                                                                                   | 1996 | 1996 | Benin   | Information not reported | 13    | 22 | 55 | No  | Yes | Biomarker         | Locally representative        |
| GDD 2010 | Report on 2007 STEPS Survey for Risk Factors and Prevalence of Noncommunicable Diseases in Thimphu                                                                               | 2007 | 2007 | Bhutan  | Information not reported | 1000  | 25 | 74 | Yes | Yes | FFQ               | Sub-nationally representative |
| GDD 2017 | Cardiovascular and metabolic syndrome risk assessment of Bolivian school children and adolescents: Relationships to obesity, diabetes, income, food intake and physical activity | 2005 | 2007 | Bolivia | Both urban and rural     | 3445  | 12 | 18 | Yes | Yes | FFQ               | Nationally representative     |
| GDD 2017 | Global Student Based Student Health Survey 2012                                                                                                                                  | 2012 | 2012 | Bolivia | Both urban and rural     | 3468  | 11 | 16 | Yes | Yes | FFQ               | Nationally representative     |
| GDD 2017 | Demographic and Health Survey Bolivia 2003                                                                                                                                       | 2003 | 2003 | Bolivia | Both urban and rural     | 15619 | 0  | 49 | Yes | Yes | DHS questionnaire | Nationally representative     |
| GDD 2017 | Demographic and Health Survey Bolivia 2008                                                                                                                                       | 2008 | 2008 | Bolivia | Both urban and rural     | 15569 | 0  | 49 | Yes | Yes | DHS questionnaire | Nationally representative     |
| GDD 2017 | Demographic and Health Survey Bolivia 1989                                                                                                                                       | 1989 | 1989 | Bolivia | Both urban and rural     | 1596  | 0  | 4  | Yes | Yes | DHS questionnaire | Nationally representative     |
| GDD 2017 | Demographic and Health Survey Bolivia 1994                                                                                                                                       | 1994 | 1994 | Bolivia | Both urban and rural     | 2856  | 0  | 2  | Yes | Yes | DHS questionnaire | Nationally representative     |

|          |                                                                                   |      |      |                        |                          |       |    |     |     |     |                                      |                               |
|----------|-----------------------------------------------------------------------------------|------|------|------------------------|--------------------------|-------|----|-----|-----|-----|--------------------------------------|-------------------------------|
| GDD 2017 | Demographic and Health Survey Bolivia 1998                                        | 1998 | 1998 | Bolivia                | Both urban and rural     | 8709  | 0  | 49  | Yes | Yes | DHS questionnaire                    | Nationally representative     |
| GDD 2017 | World Health Survey 2003                                                          | 2003 | 2003 | Bosnia And Herzegovina | Both urban and rural     | 951   | 18 | 84  | Yes | Yes | FFQ                                  | Nationally representative     |
| GDD 2010 | Non- communicable Disease Risk Factor Survey Federation of Bosnia and Herzegovina | 2002 | 2002 | Bosnia And Herzegovina | Information not reported | 1000  | 25 | 64  | Yes | Yes | FFQ                                  | Sub-nationally representative |
| GDD 2017 | Global Student Based Student Health Survey 2005                                   | 2005 | 2005 | Botswana               | Both urban and rural     | 2157  | 11 | 16  | Yes | Yes | FFQ                                  | Nationally representative     |
| GDD 2010 | Republic of Botswana Chronic Disease Risk Factor Surveillance Report 2007 (STEPS) | 2007 | 2007 | Botswana               | Information not reported | 1000  | 25 | 64  | Yes | Yes | FFQ                                  | Nationally representative     |
| GDD 2017 | Health Survey of São Paulo                                                        | 2008 | 2009 | Brazil                 | Only urban               | 1662  | 12 | 97  | Yes | Yes | Multiple 24-hour recall              | Sub-nationally representative |
| GDD 2017 | Demographic and Health Survey Brasil 1996                                         | 1996 | 1996 | Brazil                 | Both urban and rural     | 1706  | 11 | 16  | Yes | Yes | DHS questionnaire                    | Nationally representative     |
| GDD 2017 | Demographic and Health Survey Brasil 1991                                         | 1991 | 1991 | Brazil                 | Both urban and rural     | 457   | 0  | 4   | Yes | Yes | DHS questionnaire                    | Nationally representative     |
| GDD 2017 | World Health Survey 2003                                                          | 2003 | 2003 | Brazil                 | Both urban and rural     | 2608  | 18 | 95  | Yes | Yes | FFQ                                  | Nationally representative     |
| GDD 2017 | Demographic and Health Survey Brazil 1986                                         | 1986 | 1986 | Brazil                 | Both urban and rural     | 536   | 0  | 4   | Yes | Yes | DHS questionnaire                    | Nationally representative     |
| GDD 2010 | Household Health Survey (ISA-SP)                                                  | 2003 | 2003 | Brazil                 | Information not reported | 1000  | 20 | 100 | Yes | Yes | Single 24-hour recall                | Sub-nationally representative |
| GDD 2010 | Consumer Expenditure Survey                                                       | 2008 | 2009 | Brazil                 | Information not reported | 1484  | 10 | 100 | Yes | Yes | Multiple 24-hour recall              | Nationally representative     |
| GDD 2010 | Sarno                                                                             | 2002 | 2003 | Brazil                 | Information not reported | 48000 | 20 | 79  | Yes | Yes | Household availability/budget survey | Nationally representative     |
| GDD 2017 | Global Student Based Student Health Survey 2014                                   | 2014 | 2014 | Brunei Darussalam      | Both urban and rural     | 2586  | 7  | 16  | Yes | Yes | FFQ                                  | Nationally representative     |
| GDD 2010 | National Nutritional Status Survey 1997                                           | 1996 | 1997 | Brunei Darussalam      | Information not reported | 1000  | 0  | 100 | Yes | Yes | Single 24-hour recall                | Nationally representative     |

|          |                                                                                                                |      |      |              |                          |       |    |     |     |     |                         |                               |
|----------|----------------------------------------------------------------------------------------------------------------|------|------|--------------|--------------------------|-------|----|-----|-----|-----|-------------------------|-------------------------------|
| GDD 2017 | Health Behavior in School-Aged Children 2006                                                                   | 2006 | 2006 | Bulgaria     | Both urban and rural     | 4798  | 11 | 15  | Yes | Yes | FFQ                     | Nationally representative     |
| GDD 2010 | Household Budgets in Republic of Bulgaria                                                                      | 1998 | 1998 | Bulgaria     | Information not reported | 1000  | 20 | 85  | Yes | Yes | Multiple 24-hour recall | Nationally representative     |
| GDD 2010 | National Nutrition Survey                                                                                      | 2004 | 2004 | Bulgaria     | Information not reported | 500   | 16 | 64  | Yes | Yes | Single 24-hour recall   | Nationally representative     |
| GDD 2010 | National Nutrition Survey                                                                                      | 2004 | 2004 | Bulgaria     | Information not reported | 500   | 20 | 100 | Yes | Yes | Single 24-hour recall   | Nationally representative     |
| GDD 2010 | Powles et al.                                                                                                  | 1999 | 2000 | Bulgaria     | Information not reported | 30    | 45 | 74  | Yes | Yes | Biomarker               | Sub-nationally representative |
| GDD 2017 | Nutrition transition and double burden of malnutrition among adults in Ouagadougou, Burkina Faso (West Africa) | 2010 | 2010 | Burkina Faso | Only urban               | 310   | 25 | 60  | Yes | Yes | Multiple 24-hour recall | Locally representative        |
| GDD 2017 | Food Consumption and Iron Status Survey in Two Provinces of Rural Burkina Faso                                 | 2010 | 2010 | Burkina Faso | Only rural               | 2628  | 3  | 55  | Yes | Yes | Multiple 24-hour recall | Sub-nationally representative |
| GDD 2017 | World Health Survey 2003                                                                                       | 2003 | 2003 | Burkina Faso | Both urban and rural     | 4464  | 18 | 112 | Yes | Yes | FFQ                     | Nationally representative     |
| GDD 2017 | Demographic and Health Survey Burkina Faso 1993                                                                | 1993 | 1994 | Burkina Faso | Both urban and rural     | 2357  | 0  | 4   | Yes | Yes | DHS questionnaire       | Nationally representative     |
| GDD 2017 | Demographic and Health Survey Burkina Faso 2003                                                                | 2003 | 2003 | Burkina Faso | Both urban and rural     | 13502 | 0  | 49  | Yes | Yes | DHS questionnaire       | Nationally representative     |
| GDD 2017 | Demographic and Health Survey Burkina Faso 2010                                                                | 2010 | 2011 | Burkina Faso | Both urban and rural     | 26818 | 0  | 59  | Yes | Yes | DHS questionnaire       | Nationally representative     |
| GDD 2017 | Demographic and Health Survey Burkina Faso 1999                                                                | 1998 | 1999 | Burkina Faso | Both urban and rural     | 2473  | 0  | 4   | Yes | Yes | DHS questionnaire       | Nationally representative     |
| GDD 2017 | Demographic and Health Survey Burkina Faso 2014                                                                | 2014 | 2014 | Burkina Faso | Both urban and rural     | 6155  | 1  | 5   | Yes | Yes | Biomarker               | Nationally representative     |

|          |                                                                                                                            |      |      |              |                          |       |    |    |     |     |                         |                               |
|----------|----------------------------------------------------------------------------------------------------------------------------|------|------|--------------|--------------------------|-------|----|----|-----|-----|-------------------------|-------------------------------|
| GDD 2010 | Dietary Diversity as a Measure of the Micronutrient Adequacy of Women's Diets: Results from Ouagadougou, Burkina Faso Site | 2006 | 2006 | Burkina Faso | Information not reported | 100   | 17 | 49 | No  | Yes | Multiple 24-hour recall | Sub-nationally representative |
| GDD 2017 | Demographic and Health Survey Burundi 2012                                                                                 | 2012 | 2013 | Burundi      | Both urban and rural     | 3754  | 1  | 5  | Yes | Yes | Biomarker               | Nationally representative     |
| GDD 2017 | Demographic and Health Survey Burundi 2010                                                                                 | 2010 | 2011 | Burundi      | Both urban and rural     | 14636 | 0  | 59 | Yes | Yes | DHS questionnaire       | Nationally representative     |
| GDD 2017 | Demographic and Health Survey Burundi 1987                                                                                 | 1987 | 1987 | Burundi      | Both urban and rural     | 1539  | 0  | 4  | Yes | Yes | DHS questionnaire       | Nationally representative     |
| GDD 2017 | Global Student Based Student Health Survey 2013                                                                            | 2013 | 2013 | Cambodia     | Both urban and rural     | 3792  | 7  | 16 | Yes | Yes | FFQ                     | Nationally representative     |
| GDD 2017 | Demographic and Health Survey Cambodia 2000                                                                                | 2000 | 2000 | Cambodia     | Both urban and rural     | 11392 | 0  | 49 | Yes | Yes | DHS questionnaire       | Nationally representative     |
| GDD 2017 | Demographic and Health Survey Cambodia 2005                                                                                | 2005 | 2006 | Cambodia     | Both urban and rural     | 14054 | 0  | 49 | Yes | Yes | DHS questionnaire       | Nationally representative     |
| GDD 2017 | Demographic and Health Survey Cambodia 2010                                                                                | 2010 | 2011 | Cambodia     | Both urban and rural     | 15194 | 0  | 49 | Yes | Yes | DHS questionnaire       | Nationally representative     |
| GDD 2017 | Demographic and Health Survey Cambodia 2014                                                                                | 2014 | 2014 | Cambodia     | Both urban and rural     | 17098 | 0  | 49 | Yes | Yes | DHS questionnaire       | Nationally representative     |
| GDD 2010 | STEP Cambodia                                                                                                              |      |      | Cambodia     | Information not reported | 1000  | 25 | 64 | Yes | Yes | FFQ                     | Sub-nationally representative |
| GDD 2017 | Nutrition in African Population-Urban                                                                                      | 1993 | 1996 | Cameroon     | Only urban               | 991   | 24 | 74 | Yes | Yes | FFQ                     | Sub-nationally representative |
| GDD 2017 | Nutrition in African Population-Rural                                                                                      | 1993 | 1996 | Cameroon     | Only rural               | 658   | 24 | 74 | Yes | Yes | FFQ                     | Sub-nationally representative |
| GDD 2017 | Demographic and Health Survey Cameroon 2004                                                                                | 2004 | 2004 | Cameroon     | Both urban and rural     | 16581 | 0  | 59 | Yes | Yes | DHS questionnaire       | Nationally representative     |
| GDD 2017 | Demographic and Health Survey Cameroon 2011                                                                                | 2011 | 2011 | Cameroon     | Both urban and rural     | 17442 | 0  | 49 | Yes | Yes | DHS questionnaire       | Nationally representative     |

|          |                                                                    |      |      |          |                          |       |    |     |     |     |                                      |                               |
|----------|--------------------------------------------------------------------|------|------|----------|--------------------------|-------|----|-----|-----|-----|--------------------------------------|-------------------------------|
| GDD 2017 | Demographic and Health Survey Cameroon 1991                        | 1991 | 1991 | Cameroon | Both urban and rural     | 970   | 0  | 4   | Yes | Yes | DHS questionnaire                    | Nationally representative     |
| GDD 2017 | Demographic and Health Survey Cameroon 1998                        | 1998 | 1998 | Cameroon | Both urban and rural     | 1826  | 0  | 2   | Yes | Yes | DHS questionnaire                    | Nationally representative     |
| GDD 2010 | Cameroon Burden of Diabetes Project Baseline Survey Report Summary | 2003 | 2003 | Cameroon | Information not reported | 1000  | 15 | 100 | Yes | Yes | FFQ                                  | Sub-nationally representative |
| GDD 2010 | Cooper et al.                                                      | 1991 | 1994 | Cameroon | Information not reported | 2828  | 25 | 74  | Yes | Yes | Biomarker                            | Sub-nationally representative |
| GDD 2017 | Health Behavior in School-Aged Children 1994                       | 1993 | 1994 | Canada   | Both urban and rural     | 6758  | 11 | 17  | Yes | Yes | FFQ                                  | Nationally representative     |
| GDD 2017 | Health Behavior in School-Aged Children 1998                       | 1998 | 1998 | Canada   | Both urban and rural     | 6567  | 11 | 16  | Yes | Yes | FFQ                                  | Nationally representative     |
| GDD 2017 | Health Behavior in School-Aged Children 2002                       | 2001 | 2002 | Canada   | Both urban and rural     | 4361  | 11 | 16  | Yes | Yes | FFQ                                  | Nationally representative     |
| GDD 2017 | Health Behavior in School-Aged Children 2006                       | 2006 | 2006 | Canada   | Both urban and rural     | 5772  | 11 | 15  | Yes | Yes | FFQ                                  | Nationally representative     |
| GDD 2017 | Health Behavior in School-Aged Children 2010                       | 2010 | 2010 | Canada   | Both urban and rural     | 15632 | 11 | 15  | Yes | Yes | FFQ                                  | Nationally representative     |
| GDD 2017 | Health Behavior in School-Aged Children 1990                       | 1989 | 1990 | Canada   | Both urban and rural     | 5551  | 11 | 17  | Yes | Yes | FFQ                                  | Nationally representative     |
| GDD 2010 | Canadian Community Health and Nutrition Survey                     | 2004 | 2004 | Canada   | Information not reported | 1000  | 0  | 101 | Yes | Yes | Multiple 24-hour recall              | Nationally representative     |
| GDD 2010 | World-wide consumption of trans fatty acids                        | 1981 | 1981 | Canada   | Information not reported |       | 0  | 100 | Yes | Yes | Household availability/budget survey | Nationally representative     |
| GDD 2010 | World-wide consumption of trans fatty acids                        | 1981 | 1981 | Canada   | Information not reported |       | 0  | 100 | Yes | Yes | Single 24-hour recall                | Nationally representative     |
| GDD 2010 | World-wide consumption of trans fatty acids                        | 1995 | 1995 | Canada   | Information not reported |       | 0  | 100 | Yes | Yes | Single 24-hour recall                | Nationally representative     |



|          |                                                                                                                                         |      |      |                          |                          |       |    |     |     |     |                       |                               |
|----------|-----------------------------------------------------------------------------------------------------------------------------------------|------|------|--------------------------|--------------------------|-------|----|-----|-----|-----|-----------------------|-------------------------------|
| GDD 2010 | World-wide consumption of trans fatty acids                                                                                             | 1995 | 1995 | Canada                   | Information not reported |       | 0  | 100 | Yes | Yes | Single 24-hour recall | Nationally representative     |
| GDD 2010 | World-wide consumption of trans fatty acids                                                                                             | 1999 | 1999 | Canada                   | Information not reported |       | 0  | 100 | Yes | Yes | Single 24-hour recall | Nationally representative     |
| GDD 2010 | Shi et al.                                                                                                                              | 2004 | 2004 | Canada                   | Information not reported | 1402  | 30 | 79  | Yes | Yes | Single 24-hour recall | Nationally representative     |
| GDD 2010 | Garriguet                                                                                                                               | 2004 | 2004 | Canada                   | Information not reported | 681   | 20 | 79  | Yes | Yes | Single 24-hour recall | Nationally representative     |
| GDD 2010 | INTERSALT, Labrador                                                                                                                     | 1985 | 1987 | Canada                   | Information not reported | 23    | 20 | 59  | Yes | Yes | Biomarker             | Locally representative        |
| GDD 2010 | INTERSALT, St. Johns                                                                                                                    | 1985 | 1987 | Canada                   | Information not reported | 25    | 20 | 59  | Yes | Yes | Biomarker             | Sub-nationally representative |
| GDD 2010 | Cape Verde STEPS Survey 2007                                                                                                            | 2007 | 2007 | Cape Verde               | Information not reported | 1000  | 25 | 64  | Yes | Yes | FFQ                   | Nationally representative     |
| GDD 2017 | Global Student Based Student Health Survey 2007                                                                                         | 2007 | 2007 | Cayman Islands           | Only urban               | 1288  | 11 | 16  | Yes | Yes | FFQ                   | Nationally representative     |
| GDD 2017 | Demographic and Health Survey Central African Republic 1994                                                                             | 1994 | 1995 | Central African Republic | Both urban and rural     | 2490  | 0  | 2   | Yes | Yes | DHS questionnaire     | Nationally representative     |
| GDD 2017 | World Health Survey 2003                                                                                                                | 2003 | 2003 | Chad                     | Both urban and rural     | 3516  | 17 | 106 | Yes | Yes | FFQ                   | Nationally representative     |
| GDD 2017 | Demographic and Health Survey Chad 2004                                                                                                 | 2004 | 2004 | Chad                     | Both urban and rural     | 3178  | 0  | 4   | Yes | Yes | DHS questionnaire     | Nationally representative     |
| GDD 2017 | Demographic and Health Survey Chad 1996                                                                                                 | 1996 | 1997 | Chad                     | Both urban and rural     | 6145  | 0  | 4   | Yes | Yes | DHS questionnaire     | Nationally representative     |
| GDD 2017 | Demographic and Health Survey Chad 2014                                                                                                 | 2014 | 2015 | Chad                     | Both urban and rural     | 16846 | 0  | 4   | Yes | Yes | DHS questionnaire     | Nationally representative     |
| GDD 2010 | STEP Chad                                                                                                                               | 2008 | 2008 | Chad                     | Information not reported | 1000  | 25 | 64  | Yes | Yes | FFQ                   | Sub-nationally representative |
| GDD 2017 | Estado nutricional, consumo de alimentos y actividad física en escolares mujeres de diferente nivel socioeconómico de Santiago de Chile | 2003 | 2004 | Chile                    | Only urban               | 202   | 8  | 14  | No  | Yes | FFQ                   | Sub-nationally representative |

|          |                                                                                                                                         |      |      |       |                          |        |    |     |     |     |                         |                               |
|----------|-----------------------------------------------------------------------------------------------------------------------------------------|------|------|-------|--------------------------|--------|----|-----|-----|-----|-------------------------|-------------------------------|
| GDD 2017 | Estado nutricional, consumo de alimentos y actividad física en escolares mujeres de diferente nivel socioeconómico de Santiago de Chile | 2003 | 2004 | Chile | Only urban               | 356    | 8  | 13  | No  | Yes | FFQ                     | Sub-nationally representative |
| GDD 2017 | Encuesta de Nutrientes en universitarios chilenos                                                                                       | 2012 | 2012 | Chile | Only urban               | 326    | 18 | 30  | Yes | Yes | FFQ                     | Locally representative        |
| GDD 2017 | Food and Elderly                                                                                                                        | 2014 | 2014 | Chile | Only urban               | 1450   | 60 | 100 | Yes | Yes | FFQ                     | Sub-nationally representative |
| GDD 2017 | Global Student Based Student Health Survey 2004                                                                                         | 2004 | 2004 | Chile | Both urban and rural     | 8083   | 11 | 16  | Yes | Yes | FFQ                     | Nationally representative     |
| GDD 2017 | Global Student Based Student Health Survey 2013                                                                                         | 2013 | 2013 | Chile | Both urban and rural     | 2030   | 7  | 16  | Yes | Yes | FFQ                     | Nationally representative     |
| GDD 2017 | Global Student Based Student Health Survey 2005                                                                                         | 2005 | 2005 | Chile | Both urban and rural     | 7199   | 11 | 16  | Yes | Yes | FFQ                     | Nationally representative     |
| GDD 2017 | Global Student Based Student Health Survey 2003                                                                                         | 2003 | 2003 | China | Only urban               | 8846   | 11 | 16  | Yes | Yes | FFQ                     | Nationally representative     |
| GDD 2017 | Study of Global Ageing and Adult Health                                                                                                 | 2007 | 2013 | China | Both urban and rural     | 14168  | 18 | 99  | Yes | Yes | FFQ                     | Nationally representative     |
| GDD 2017 | World Health Survey 2003                                                                                                                | 2003 | 2003 | China | Both urban and rural     | 3722   | 18 | 98  | Yes | Yes | FFQ                     | Nationally representative     |
| GDD 2010 | 2002 China National Nutrition and Health Survey                                                                                         | 2002 | 2002 | China | Information not reported | 1346   | 1  | 101 | Yes | Yes | Multiple 24-hour recall | Nationally representative     |
| GDD 2010 | Zhao, L.                                                                                                                                | 2002 | 2002 | China | Information not reported | 222104 | 20 | 20  | Yes | No  | Multiple 24-hour recall | Nationally representative     |
| GDD 2010 | Zhou BF et al. (1 of 9)                                                                                                                 | 1982 | 1984 | China | Information not reported | 342    | 35 | 59  | Yes | No  | Multiple 24-hour recall | Locally representative        |
| GDD 2010 | Zhao GS et al.( 1 of 3)                                                                                                                 | 1982 | 1984 | China | Information not reported | 92     | 40 | 59  | Yes | No  | Biomarker               | Locally representative        |
| GDD 2010 | INTERSALT, Beijing                                                                                                                      | 1985 | 1987 | China | Information not reported | 25     | 20 | 59  | Yes | Yes | Biomarker               | Sub-nationally representative |
| GDD 2010 | INTERSALT, Tianjin                                                                                                                      | 1985 | 1987 | China | Information not reported | 25     | 20 | 59  | Yes | Yes | Biomarker               | Sub-nationally representative |
| GDD 2010 | INTERSALT, Nanning                                                                                                                      | 1985 | 1987 | China | Information not reported | 25     | 20 | 59  | Yes | Yes | Biomarker               | Sub-nationally representative |
| GDD 2010 | Nan et al.                                                                                                                              | 1992 | 1992 | China | Information not reported | 1133   | 20 | 64  | Yes | Yes | Multiple 24-hour recall | Sub-nationally representative |

|          |                                                                                                                         |      |      |          |                                 |      |    |    |     |     |                                |                                      |
|----------|-------------------------------------------------------------------------------------------------------------------------|------|------|----------|---------------------------------|------|----|----|-----|-----|--------------------------------|--------------------------------------|
| GDD 2010 | Liu et al.                                                                                                              | 1985 | 1999 | China    | <i>Information not reported</i> | 403  | 48 | 56 | Yes | Yes | <i>Biomarker</i>               | <i>Nationally representative</i>     |
| GDD 2010 | INTERMAP, Beijing                                                                                                       | 1997 | 1997 | China    | <i>Information not reported</i> | 67   | 40 | 59 | Yes | Yes | <i>Biomarker</i>               | <i>Sub-nationally representative</i> |
| GDD 2010 | INTERMAP, Guangxi                                                                                                       | 1997 | 1998 | China    | <i>Information not reported</i> | 70   | 40 | 59 | Yes | Yes | <i>Biomarker</i>               | <i>Sub-nationally representative</i> |
| GDD 2010 | INTERMAP, Shanxi                                                                                                        | 1997 | 1998 | China    | <i>Information not reported</i> | 73   | 40 | 59 | Yes | Yes | <i>Biomarker</i>               | <i>Sub-nationally representative</i> |
| GDD 2010 | Zhou BF et al. (2 of 9)                                                                                                 | 1982 | 1984 | China    | <i>Information not reported</i> | 124  | 35 | 59 | Yes | No  | <i>Multiple 24-hour recall</i> | <i>Locally representative</i>        |
| GDD 2010 | Zhou BF et al. (3 of 9)                                                                                                 | 1982 | 1984 | China    | <i>Information not reported</i> | 51   | 35 | 59 | Yes | No  | <i>Multiple 24-hour recall</i> | <i>Locally representative</i>        |
| GDD 2010 | Zhou BF et al. (4 of 9)                                                                                                 | 1982 | 1984 | China    | <i>Information not reported</i> | 119  | 35 | 59 | Yes | No  | <i>Multiple 24-hour recall</i> | <i>Locally representative</i>        |
| GDD 2010 | Zhou BF et al. (5 of 9)                                                                                                 | 1982 | 1984 | China    | <i>Information not reported</i> | 181  | 35 | 59 | Yes | No  | <i>Multiple 24-hour recall</i> | <i>Locally representative</i>        |
| GDD 2010 | Zhou BF et al. (6 of 9)                                                                                                 | 1982 | 1984 | China    | <i>Information not reported</i> | 215  | 35 | 59 | Yes | No  | <i>Multiple 24-hour recall</i> | <i>Locally representative</i>        |
| GDD 2010 | Zhou BF et al. (7 of 9)                                                                                                 | 1982 | 1984 | China    | <i>Information not reported</i> | 85   | 35 | 59 | Yes | No  | <i>Multiple 24-hour recall</i> | <i>Locally representative</i>        |
| GDD 2010 | Zhou BF et al. (8 of 9)                                                                                                 | 1982 | 1984 | China    | <i>Information not reported</i> | 212  | 35 | 59 | Yes | No  | <i>Multiple 24-hour recall</i> | <i>Locally representative</i>        |
| GDD 2010 | Zhou BF et al. (9 of 9)                                                                                                 | 1982 | 1984 | China    | <i>Information not reported</i> | 195  | 35 | 59 | Yes | No  | <i>Multiple 24-hour recall</i> | <i>Locally representative</i>        |
| GDD 2010 | Zhao GS et al. (2 of 3)                                                                                                 | 1982 | 1984 | China    | <i>Information not reported</i> | 82   | 40 | 59 | Yes | No  | <i>Biomarker</i>               | <i>Locally representative</i>        |
| GDD 2010 | Zhao GS et al.(3 of 3)                                                                                                  | 1982 | 1984 | China    | <i>Information not reported</i> | 83   | 40 | 59 | Yes | No  | <i>Biomarker</i>               | <i>Locally representative</i>        |
| GDD 2010 | INTERMAP, Beijing                                                                                                       | 1997 | 1997 | China    | <i>Information not reported</i> | 67   | 40 | 59 | Yes | Yes | <i>Single 24-hour recall</i>   | <i>Sub-nationally representative</i> |
| GDD 2010 | INTERMAP, Guangxi                                                                                                       | 1997 | 1998 | China    | <i>Information not reported</i> | 70   | 40 | 59 | Yes | Yes | <i>Single 24-hour recall</i>   | <i>Sub-nationally representative</i> |
| GDD 2010 | INTERMAP, Shanxi                                                                                                        | 1997 | 1997 | China    | <i>Information not reported</i> | 73   | 40 | 59 | Yes | Yes | <i>Single 24-hour recall</i>   | <i>Sub-nationally representative</i> |
| GDD 2017 | Situación de salud y perfil metabólico en población menor de 18 años residente en Santander, Colombia (The SALUS Study) | 2013 | 2014 | Colombia | <i>Both urban and rural</i>     | 3697 | 0  | 17 | Yes | Yes | <i>FFQ</i>                     | <i>Sub-nationally representative</i> |
| GDD 2017 | CASE CONTROL STUDY TO IDENTIFY RISK FACTORS FOR PREECLAMPSIA                                                            | 2006 | 2009 | Colombia | <i>Both urban and rural</i>     | 383  | 12 | 45 | Yes | Yes | <i>FFQ</i>                     | <i>Nationally representative</i>     |

|          |                                                                                                                                                                                             |      |      |          |                      |       |    |    |     |     |                       |                           |
|----------|---------------------------------------------------------------------------------------------------------------------------------------------------------------------------------------------|------|------|----------|----------------------|-------|----|----|-----|-----|-----------------------|---------------------------|
| GDD 2017 | Associated factors to dietary intake of fruits and vegetables in Bucaramanga, Colombia                                                                                                      | 2006 | 2007 | Colombia | Only urban           | 317   | 18 | 90 | Yes | Yes | Single 24-hour recall | Locally representative    |
| GDD 2017 | Effects of environmental exposure to lead and cadmium in the occurrence of low birth weight (LBW) and intrauterine growth restriction in a cohort of pregnant women Cali-Colombia 2009-2011 | 2010 | 2012 | Colombia | Only urban           | 380   | 18 | 35 | No  | Yes | Single 24-hour recall | Locally representative    |
| GDD 2017 | Urban Schooled Children -IFRECNEC Study                                                                                                                                                     | 1997 | 2000 | Colombia | Only urban           | 2807  | 6  | 19 | Yes | Yes | Single 24-hour recall | Locally representative    |
| GDD 2017 | Iron and cardiovascular risk project                                                                                                                                                        | 2009 | 2011 | Colombia | Only urban           | 245   | 25 | 68 | Yes | Yes | Biomarker             | Locally representative    |
| GDD 2017 | Improving the nutritional status of preschool children assessing individual response to different types of interventions in nutrient intake                                                 | 2005 | 2007 | Colombia | Only urban           | 520   | 1  | 6  | Yes | Yes | Biomarker             | Locally representative    |
| GDD 2017 | Global Student Based Student Health Survey 2007                                                                                                                                             | 2007 | 2007 | Colombia | Only urban           | 9823  | 11 | 16 | Yes | Yes | FFQ                   | Nationally representative |
| GDD 2017 | Demographic and Health Survey Colombia 1995                                                                                                                                                 | 1995 | 1995 | Colombia | Both urban and rural | 3671  | 0  | 4  | Yes | Yes | DHS questionnaire     | Nationally representative |
| GDD 2017 | Demographic and Health Survey Colombia 2000                                                                                                                                                 | 2000 | 2000 | Colombia | Both urban and rural | 3380  | 0  | 4  | Yes | Yes | DHS questionnaire     | Nationally representative |
| GDD 2017 | Demographic and Health Survey Colombia 2005                                                                                                                                                 | 2004 | 2005 | Colombia | Both urban and rural | 9309  | 0  | 4  | Yes | Yes | DHS questionnaire     | Nationally representative |
| GDD 2017 | Demographic and Health Survey Colombia 2010                                                                                                                                                 | 2009 | 2009 | Colombia | Both urban and rural | 11298 | 0  | 4  | Yes | Yes | DHS questionnaire     | Nationally representative |
| GDD 2017 | Demographic and Health Survey Colombia 1990                                                                                                                                                 | 1990 | 1990 | Colombia | Both urban and rural | 1175  | 0  | 4  | Yes | Yes | DHS questionnaire     | Nationally representative |

|          |                                                                                                                                       |      |      |                            |                          |       |    |     |     |     |                         |                               |
|----------|---------------------------------------------------------------------------------------------------------------------------------------|------|------|----------------------------|--------------------------|-------|----|-----|-----|-----|-------------------------|-------------------------------|
| GDD 2010 | Database from National survey of nutritional situation in Colombia                                                                    | 2005 | 2005 | Colombia                   | Information not reported | 1294  | 20 | 64  | Yes | Yes | Multiple 24-hour recall | Nationally representative     |
| GDD 2010 | INTERSALT, Tuquerres                                                                                                                  | 1985 | 1987 | Colombia                   | Information not reported | 24    | 20 | 59  | Yes | Yes | Biomarker               | Sub-nationally representative |
| GDD 2017 | World Health Survey 2003                                                                                                              | 2003 | 2003 | Comoros                    | Both urban and rural     | 1632  | 18 | 90  | Yes | Yes | FFQ                     | Nationally representative     |
| GDD 2017 | Demographic and Health Survey Comoros 2012                                                                                            | 2012 | 2012 | Comoros                    | Both urban and rural     | 2061  | 0  | 4   | Yes | Yes | DHS questionnaire       | Nationally representative     |
| GDD 2017 | Demographic and Health Survey Comoros 1996                                                                                            | 1996 | 1996 | Comoros                    | Both urban and rural     | 1039  | 0  | 2   | Yes | Yes | DHS questionnaire       | Nationally representative     |
| GDD 2017 | World Health Survey 2003                                                                                                              | 2003 | 2003 | Congo                      | Both urban and rural     | 1698  | 16 | 85  | Yes | Yes | FFQ                     | Nationally representative     |
| GDD 2017 | Demographic and Health Survey Congo 2011                                                                                              | 2011 | 2012 | Congo                      | Both urban and rural     | 12848 | 0  | 49  | Yes | Yes | DHS questionnaire       | Nationally representative     |
| GDD 2017 | Demographic and Health Survey Congo 2005                                                                                              | 2005 | 2005 | Congo                      | Both urban and rural     | 3307  | 0  | 4   | Yes | Yes | DHS questionnaire       | Nationally representative     |
| GDD 2010 | STEP Congo                                                                                                                            | 2004 | 2004 | Congo                      | Information not reported | 1000  | 25 | 64  | Yes | Yes | FFQ                     | Sub-nationally representative |
| GDD 2017 | Contribution of wild edible plants to women's diets                                                                                   | 2009 | 2009 | Congo, Democratic Republic | Both urban and rural     | 960   | 15 | 72  | No  | Yes | Multiple 24-hour recall | Locally representative        |
| GDD 2017 | Demographic and Health Survey Democratic Republic of Congo 2007                                                                       | 2007 | 2007 | Congo, Democratic Republic | Both urban and rural     | 11112 | 0  | 49  | Yes | Yes | DHS questionnaire       | Nationally representative     |
| GDD 2017 | Demographic and Health Survey Democratic Republic of Congo 2013                                                                       | 2013 | 2014 | Congo, Democratic Republic | Both urban and rural     | 32550 | 0  | 59  | Yes | Yes | DHS questionnaire       | Nationally representative     |
| GDD 2010 | Enquête sur les facteurs de risque des maladies non transmissibles Kinshasa, capitale de la RD Congo, Selon l'approche STEPS de l'OMS | 2005 | 2005 | Congo, Democratic Republic | Information not reported | 1000  | 15 | 100 | Yes | Yes | FFQ                     | Sub-nationally representative |
| GDD 2017 | Global Student Based Student Health Survey 2011                                                                                       | 2011 | 2011 | Cook Islands               | Both urban and rural     | 1269  | 11 | 16  | Yes | Yes | FFQ                     | Nationally representative     |
| GDD 2010 | STEP Cook Islands                                                                                                                     | 2003 | 2003 | Cook Islands               | Information not reported | 1000  | 25 | 64  | Yes | Yes | FFQ                     | Nationally representative     |

|          |                                                                                                                          |      |      |               |                          |       |    |     |     |     |                                      |                               |
|----------|--------------------------------------------------------------------------------------------------------------------------|------|------|---------------|--------------------------|-------|----|-----|-----|-----|--------------------------------------|-------------------------------|
| GDD 2017 | Global Student Based Student Health Survey 2009                                                                          | 2009 | 2009 | Costa Rica    | Both urban and rural     | 2657  | 11 | 16  | Yes | Yes | FFQ                                  | Nationally representative     |
| GDD 2017 | World Health Survey 2003                                                                                                 | 2003 | 2003 | Cote D'Ivoire | Both urban and rural     | 2515  | 18 | 95  | Yes | Yes | FFQ                                  | Nationally representative     |
| GDD 2017 | Demographic and Health Survey Cote d'Ivoire 1994                                                                         | 1994 | 1994 | Cote D'Ivoire | Both urban and rural     | 2529  | 0  | 2   | Yes | Yes | DHS questionnaire                    | Nationally representative     |
| GDD 2017 | Demographic and Health Survey Cote d'Ivoire 2011                                                                         | 2011 | 2012 | Cote D'Ivoire | Both urban and rural     | 14808 | 0  | 59  | Yes | Yes | DHS questionnaire                    | Nationally representative     |
| GDD 2017 | Demographic and Health Survey Cote d'Ivoire 1998                                                                         | 1998 | 1999 | Cote D'Ivoire | Both urban and rural     | 1243  | 0  | 4   | Yes | Yes | DHS questionnaire                    | Nationally representative     |
| GDD 2010 | Enquête sur les facteurs de risque des maladies non transmissibles, Côte d'Ivoire, Régions sanitaires des Lagunes - 2005 | 2005 | 2005 | Cote D'Ivoire | Information not reported | 1000  | 15 | 100 | Yes | Yes | FFQ                                  | Sub-nationally representative |
| GDD 2010 | Hess et al. (1 of 2)                                                                                                     | 1997 | 1997 | Cote D'Ivoire | Information not reported | 52    | 20 | 79  | Yes | Yes | Biomarker                            | Sub-nationally representative |
| GDD 2010 | Hess et al. (2 of 2)                                                                                                     | 1997 | 1997 | Cote D'Ivoire | Information not reported | 51    | 20 | 79  | Yes | Yes | Biomarker                            | Sub-nationally representative |
| GDD 2017 | World Health Survey 2003                                                                                                 | 2003 | 2003 | Croatia       | Both urban and rural     | 944   | 18 | 93  | Yes | Yes | FFQ                                  | Nationally representative     |
| GDD 2017 | Health Behavior in School-Aged Children 2002                                                                             | 2001 | 2002 | Croatia       | Both urban and rural     | 4366  | 11 | 16  | Yes | Yes | FFQ                                  | Nationally representative     |
| GDD 2017 | Health Behavior in School-Aged Children 2006                                                                             | 2006 | 2006 | Croatia       | Both urban and rural     | 4948  | 11 | 15  | Yes | Yes | FFQ                                  | Nationally representative     |
| GDD 2017 | Health Behavior in School-Aged Children 2010                                                                             | 2010 | 2010 | Croatia       | Both urban and rural     | 6225  | 11 | 15  | Yes | Yes | FFQ                                  | Nationally representative     |
| GDD 2010 | Croatian Community Health and Nutrition Survey                                                                           | 1999 | 1999 | Croatia       | Information not reported | 1000  | 0  | 100 | Yes | Yes | Household availability/budget survey | Nationally representative     |
| GDD 2010 | Croatian Community Health and Nutrition Survey                                                                           | 2004 | 2004 | Croatia       | Information not reported | 1000  | 0  | 100 | Yes | Yes | Household availability/budget survey | Nationally representative     |

|          |                                               |      |      |                |                                 |      |    |     |     |     |                                                  |                                  |
|----------|-----------------------------------------------|------|------|----------------|---------------------------------|------|----|-----|-----|-----|--------------------------------------------------|----------------------------------|
| GDD 2010 | Cypriot Community Health and Nutrition Survey | 1996 | 1997 | Cyprus         | <i>Information not reported</i> | 1000 | 0  | 100 | Yes | Yes | <i>Household availability/<br/>budget survey</i> | <i>Nationally representative</i> |
| GDD 2010 | Cypriot Community Health and Nutrition Survey | 2003 | 2003 | Cyprus         | <i>Information not reported</i> | 1000 | 0  | 100 | Yes | Yes | <i>Household availability/<br/>budget survey</i> | <i>Nationally representative</i> |
| GDD 2017 | World Health Survey 2003                      | 2003 | 2003 | Czech Republic | <i>Both urban and rural</i>     | 875  | 18 | 93  | Yes | Yes | <i>FFQ</i>                                       | <i>Nationally representative</i> |
| GDD 2017 | Health Behavior in School-Aged Children 1994  | 1993 | 1994 | Czech Republic | <i>Both urban and rural</i>     | 3585 | 11 | 17  | Yes | Yes | <i>FFQ</i>                                       | <i>Nationally representative</i> |
| GDD 2017 | Health Behavior in School-Aged Children 1998  | 1998 | 1998 | Czech Republic | <i>Both urban and rural</i>     | 3647 | 11 | 16  | Yes | Yes | <i>FFQ</i>                                       | <i>Nationally representative</i> |
| GDD 2017 | Health Behavior in School-Aged Children 2002  | 2001 | 2002 | Czech Republic | <i>Both urban and rural</i>     | 5012 | 11 | 16  | Yes | Yes | <i>FFQ</i>                                       | <i>Nationally representative</i> |
| GDD 2017 | Health Behavior in School-Aged Children 2006  | 2006 | 2006 | Czech Republic | <i>Both urban and rural</i>     | 4750 | 11 | 15  | Yes | Yes | <i>FFQ</i>                                       | <i>Nationally representative</i> |
| GDD 2017 | Health Behavior in School-Aged Children 2010  | 2010 | 2010 | Czech Republic | <i>Both urban and rural</i>     | 4391 | 11 | 15  | Yes | Yes | <i>FFQ</i>                                       | <i>Nationally representative</i> |
| GDD 2010 | Individual food consumption study             | 2003 | 2004 | Czech Republic | <i>Information not reported</i> | 1000 | 16 | 64  | Yes | Yes | <i>Multiple 24-hour recall</i>                   | <i>Nationally representative</i> |
| GDD 2010 | Nutritional status of Czech children          |      |      | Czech Republic | <i>Information not reported</i> | 1000 | 4  | 9   | Yes | Yes | <i>Multiple 24-hour recall</i>                   | <i>Nationally representative</i> |
| GDD 2010 | Czech Post-MONICA study                       |      |      | Czech Republic | <i>Information not reported</i> | 1000 | 19 | 64  | Yes | Yes | <i>Single 24-hour recall</i>                     | <i>Nationally representative</i> |
| GDD 2017 | Health Behavior in School-Aged Children 1994  | 1993 | 1994 | Denmark        | <i>Both urban and rural</i>     | 3792 | 11 | 17  | Yes | Yes | <i>FFQ</i>                                       | <i>Nationally representative</i> |
| GDD 2017 | Health Behavior in School-Aged Children 1998  | 1998 | 1998 | Denmark        | <i>Both urban and rural</i>     | 4934 | 11 | 17  | Yes | Yes | <i>FFQ</i>                                       | <i>Nationally representative</i> |
| GDD 2017 | Health Behavior in School-Aged Children 2002  | 2001 | 2002 | Denmark        | <i>Both urban and rural</i>     | 4587 | 11 | 17  | Yes | Yes | <i>FFQ</i>                                       | <i>Nationally representative</i> |
| GDD 2017 | Health Behavior in School-Aged Children 2006  | 2006 | 2006 | Denmark        | <i>Both urban and rural</i>     | 5667 | 11 | 15  | Yes | Yes | <i>FFQ</i>                                       | <i>Nationally representative</i> |

|          |                                                       |      |      |                    |                          |       |    |     |     |     |                         |                               |
|----------|-------------------------------------------------------|------|------|--------------------|--------------------------|-------|----|-----|-----|-----|-------------------------|-------------------------------|
| GDD 2017 | Health Behavior in School-Aged Children 2010          | 2010 | 2010 | Denmark            | Both urban and rural     | 4019  | 11 | 15  | Yes | Yes | FFQ                     | Nationally representative     |
| GDD 2010 | Dietary Habits of Denmark                             | 2000 | 2002 | Denmark            | Information not reported | 500   | 4  | 14  | Yes | Yes | Multiple 24-hour recall | Nationally representative     |
| GDD 2010 | Dietary Habits of Denmark                             | 2000 | 2002 | Denmark            | Information not reported | 1283  | 15 | 100 | Yes | Yes | Multiple 24-hour recall | Nationally representative     |
| GDD 2010 | Report of Dietary habits in Denmark from 2000-2002    | 2000 | 2002 | Denmark            | Information not reported | 1467  | 20 | 75  | Yes | Yes | Multiple 24-hour recall | Nationally representative     |
| GDD 2010 | TRANSFAIR study                                       | 1995 | 1995 | Denmark            | Information not reported | 500   | 19 | 64  | Yes | Yes | Single 24-hour recall   | Nationally representative     |
| GDD 2010 | INTERSALT, Glostrup                                   | 1985 | 1987 | Denmark            | Information not reported | 24    | 20 | 59  | Yes | Yes | Biomarker               | Sub-nationally representative |
| GDD 2010 | Andersen et al.                                       | 2006 | 2006 | Denmark            | Information not reported | 37    | 20 | 55  | Yes | Yes | Biomarker               | Sub-nationally representative |
| GDD 2017 | Global Student Based Student Health Survey 2009       | 2009 | 2009 | Dominica           | Both urban and rural     | 1628  | 11 | 16  | Yes | Yes | FFQ                     | Nationally representative     |
| GDD 2010 | WHO STEPS Survey for Dominica 2007                    | 2007 | 2007 | Dominica           | Information not reported | 1000  | 15 | 64  | Yes | Yes | FFQ                     | Nationally representative     |
| GDD 2017 | World Health Survey 2003                              | 2003 | 2003 | Dominican Republic | Both urban and rural     | 3503  | 18 | 103 | Yes | Yes | FFQ                     | Nationally representative     |
| GDD 2017 | Demographic and Health Survey Dominican Republic 1986 | 1986 | 1986 | Dominican Republic | Both urban and rural     | 816   | 0  | 4   | Yes | Yes | DHS questionnaire       | Nationally representative     |
| GDD 2017 | Demographic and Health Survey Dominican Republic 1991 | 1991 | 1991 | Dominican Republic | Both urban and rural     | 678   | 0  | 4   | Yes | Yes | DHS questionnaire       | Nationally representative     |
| GDD 2017 | Demographic and Health Survey Dominican Republic 1996 | 1996 | 1996 | Dominican Republic | Both urban and rural     | 2955  | 0  | 4   | Yes | Yes | DHS questionnaire       | Nationally representative     |
| GDD 2017 | Demographic and Health Survey Dominican Republic 1999 | 1999 | 1999 | Dominican Republic | Both urban and rural     | 564   | 0  | 4   | Yes | Yes | DHS questionnaire       | Nationally representative     |
| GDD 2017 | Demographic and Health Survey Dominican Republic 2007 | 2007 | 2007 | Dominican Republic | Both urban and rural     | 12892 | 0  | 48  | Yes | Yes | DHS questionnaire       | Nationally representative     |
| GDD 2017 | Demographic and Health Survey Dominican Republic 2013 | 2013 | 2013 | Dominican Republic | Both urban and rural     | 1874  | 0  | 4   | Yes | Yes | DHS questionnaire       | Nationally representative     |
| GDD 2017 | DHS IV                                                | 2002 | 2002 | Dominican Republic | Both urban and rural     | 10074 | 0  | 4   | Yes | Yes | DHS questionnaire       | Nationally representative     |



|          |                                                                                |      |      |             |                                 |       |    |    |     |     |                                |                                      |
|----------|--------------------------------------------------------------------------------|------|------|-------------|---------------------------------|-------|----|----|-----|-----|--------------------------------|--------------------------------------|
| GDD 2017 | Baseline of child nutritional status                                           | 2008 | 2008 | Ecuador     | <i>Only urban</i>               | 650   | 0  | 2  | Yes | Yes | <i>Multiple 24-hour recall</i> | <i>Locally representative</i>        |
| GDD 2017 | Baseline survey of Nutritional Status in a rural highland area                 | 2008 | 2008 | Ecuador     | <i>Only rural</i>               | 394   | 0  | 2  | Yes | Yes | <i>Single 24-hour recall</i>   | <i>Locally representative</i>        |
| GDD 2017 | World Health Survey 2003                                                       | 2003 | 2003 | Ecuador     | <i>Both urban and rural</i>     | 2607  | 18 | 95 | Yes | Yes | FFQ                            | <i>Nationally representative</i>     |
| GDD 2017 | Global Student Based Student Health Survey 2007                                | 2007 | 2007 | Ecuador     | <i>Only urban</i>               | 5386  | 11 | 16 | Yes | Yes | FFQ                            | <i>Nationally representative</i>     |
| GDD 2017 | Demographic and Health Survey Ecuador 1987                                     | 1987 | 1987 | Ecuador     | <i>Both urban and rural</i>     | 755   | 0  | 3  | Yes | Yes | <i>DHS questionnaire</i>       | <i>Nationally representative</i>     |
| GDD 2017 | Global Student Based Student Health Survey 2006                                | 2006 | 2006 | Egypt       | <i>Both urban and rural</i>     | 5084  | 11 | 16 | Yes | Yes | FFQ                            | <i>Nationally representative</i>     |
| GDD 2017 | Global Student Based Student Health Survey 2011                                | 2011 | 2011 | Egypt       | <i>Both urban and rural</i>     | 2478  | 11 | 16 | Yes | Yes | FFQ                            | <i>Nationally representative</i>     |
| GDD 2017 | Demographic and Health Survey Egypt 1995                                       | 1995 | 1995 | Egypt       | <i>Both urban and rural</i>     | 7662  | 0  | 4  | Yes | Yes | <i>DHS questionnaire</i>       | <i>Nationally representative</i>     |
| GDD 2017 | Demographic and Health Survey Egypt 2000                                       | 2000 | 2000 | Egypt       | <i>Both urban and rural</i>     | 18506 | 0  | 49 | Yes | Yes | <i>DHS questionnaire</i>       | <i>Nationally representative</i>     |
| GDD 2017 | Demographic and Health Survey Egypt 2003                                       | 2003 | 2003 | Egypt       | <i>Both urban and rural</i>     | 5047  | 0  | 4  | Yes | Yes | <i>DHS questionnaire</i>       | <i>Nationally representative</i>     |
| GDD 2017 | Demographic and Health Survey Egypt 2005                                       | 2005 | 2005 | Egypt       | <i>Both urban and rural</i>     | 23678 | 0  | 49 | Yes | Yes | <i>DHS questionnaire</i>       | <i>Nationally representative</i>     |
| GDD 2017 | Demographic and Health Survey Egypt 2008                                       | 2008 | 2008 | Egypt       | <i>Both urban and rural</i>     | 14443 | 0  | 49 | Yes | Yes | <i>DHS questionnaire</i>       | <i>Nationally representative</i>     |
| GDD 2017 | Demographic and Health Survey Egypt 2014                                       | 2014 | 2014 | Egypt       | <i>Both urban and rural</i>     | 20643 | 0  | 49 | Yes | Yes | <i>DHS questionnaire</i>       | <i>Nationally representative</i>     |
| GDD 2010 | Multi-centre study of the Mediterranean Group for the Study of Diabetes (MGSD) | 1995 |      | Egypt       | <i>Information not reported</i> | 100   | 35 | 60 | Yes | Yes | FFQ                            | <i>Sub-nationally representative</i> |
| GDD 2017 | Global Student Based Student Health Survey 2013                                | 2013 | 2013 | El Salvador | <i>Both urban and rural</i>     | 1862  | 11 | 16 | Yes | Yes | FFQ                            | <i>Nationally representative</i>     |

|          |                                                                                                   |      |      |          |                                 |       |    |     |     |     |                              |                                      |
|----------|---------------------------------------------------------------------------------------------------|------|------|----------|---------------------------------|-------|----|-----|-----|-----|------------------------------|--------------------------------------|
| GDD 2010 | National noncommunicable disease (NCD) risk factor baseline survey (using WHO STEPSwise approach) | 2004 | 2004 | Eritrea  | <i>Information not reported</i> | 1000  | 15 | 64  | Yes | Yes | FFQ                          | <i>Nationally representative</i>     |
| GDD 2017 | World Health Survey 2003                                                                          | 2003 | 2003 | Estonia  | <i>Both urban and rural</i>     | 933   | 18 | 92  | Yes | Yes | FFQ                          | <i>Nationally representative</i>     |
| GDD 2017 | Health Behavior in School-Aged Children 1994                                                      | 1993 | 1994 | Estonia  | <i>Both urban and rural</i>     | 3516  | 10 | 16  | Yes | Yes | FFQ                          | <i>Nationally representative</i>     |
| GDD 2017 | Health Behavior in School-Aged Children 1998                                                      | 1998 | 1998 | Estonia  | <i>Both urban and rural</i>     | 1897  | 11 | 16  | Yes | Yes | FFQ                          | <i>Nationally representative</i>     |
| GDD 2017 | Health Behavior in School-Aged Children 2002                                                      | 2001 | 2002 | Estonia  | <i>Both urban and rural</i>     | 3976  | 11 | 16  | Yes | Yes | FFQ                          | <i>Nationally representative</i>     |
| GDD 2017 | Health Behavior in School-Aged Children 2006                                                      | 2006 | 2006 | Estonia  | <i>Both urban and rural</i>     | 4458  | 11 | 15  | Yes | Yes | FFQ                          | <i>Nationally representative</i>     |
| GDD 2017 | Health Behavior in School-Aged Children 2010                                                      | 2010 | 2010 | Estonia  | <i>Both urban and rural</i>     | 4202  | 11 | 15  | Yes | Yes | FFQ                          | <i>Nationally representative</i>     |
| GDD 2010 | Estonian National Dietary Survey                                                                  | 1997 | 1997 | Estonia  | <i>Information not reported</i> | 1000  | 16 | 64  | Yes | Yes | <i>Single 24-hour recall</i> | <i>Nationally representative</i>     |
| GDD 2017 | Nutritional status and dietary intake of urban residents in Gondar, Northwest Ethiopia            | 2004 | 2007 | Ethiopia | <i>Only urban</i>               | 356   | 18 | 80  | Yes | Yes | FFQ                          | <i>Sub-nationally representative</i> |
| GDD 2017 | Demographic and Health Study 2000                                                                 | 2000 | 2000 | Ethiopia | <i>Both urban and rural</i>     | 9203  | 0  | 4   | Yes | Yes | <i>DHS questionnaire</i>     | <i>Nationally representative</i>     |
| GDD 2017 | Demographic and Health Study 2005                                                                 | 2005 | 2005 | Ethiopia | <i>Both urban and rural</i>     | 17526 | 0  | 49  | Yes | Yes | <i>DHS questionnaire</i>     | <i>Nationally representative</i>     |
| GDD 2017 | Demographic and Health Survey 2011                                                                | 2011 | 2011 | Ethiopia | <i>Both urban and rural</i>     | 6692  | 0  | 4   | Yes | Yes | <i>DHS questionnaire</i>     | <i>Nationally representative</i>     |
| GDD 2017 | Ethiopia World Health Study 2003                                                                  | 2003 | 2003 | Ethiopia | <i>Both urban and rural</i>     | 2803  | 16 | 106 | Yes | Yes | FFQ                          | <i>Nationally representative</i>     |
| GDD 2017 | Global Student Based Student Health Survey 2010                                                   | 2010 | 2010 | Fiji     | <i>Both urban and rural</i>     | 1658  | 12 | 16  | Yes | Yes | FFQ                          | <i>Nationally representative</i>     |

|          |                                                                  |      |      |         |                          |      |    |     |     |     |                                          |                           |
|----------|------------------------------------------------------------------|------|------|---------|--------------------------|------|----|-----|-----|-----|------------------------------------------|---------------------------|
| GDD 2017 | Health Behavior in School-Aged Children 1986                     | 1985 | 1986 | Finland | Both urban and rural     | 3179 | 11 | 17  | Yes | Yes | FFQ                                      | Nationally representative |
| GDD 2017 | Health Behavior in School-Aged Children 1990                     | 1989 | 1990 | Finland | Both urban and rural     | 2960 | 11 | 17  | Yes | Yes | FFQ                                      | Nationally representative |
| GDD 2017 | Health Behavior in School-Aged Children 1994                     | 1993 | 1994 | Finland | Both urban and rural     | 4074 | 11 | 17  | Yes | Yes | FFQ                                      | Nationally representative |
| GDD 2017 | Health Behavior in School-Aged Children 1998                     | 1998 | 1998 | Finland | Both urban and rural     | 4827 | 11 | 17  | Yes | Yes | FFQ                                      | Nationally representative |
| GDD 2017 | Health Behavior in School-Aged Children 2002                     | 2001 | 2002 | Finland | Both urban and rural     | 5348 | 11 | 17  | Yes | Yes | FFQ                                      | Nationally representative |
| GDD 2017 | Health Behavior in School-Aged Children 2006                     | 2006 | 2006 | Finland | Both urban and rural     | 5187 | 11 | 15  | Yes | Yes | FFQ                                      | Nationally representative |
| GDD 2017 | Health Behavior in School-Aged Children 2010                     | 2010 | 2010 | Finland | Both urban and rural     | 6606 | 11 | 15  | Yes | Yes | FFQ                                      | Nationally representative |
| GDD 2010 | Finn Community Health and Nutrition Survey                       | 1985 | 1985 | Finland | Information not reported | 1000 | 0  | 100 | Yes | Yes | Household availability/<br>budget survey | Nationally representative |
| GDD 2010 | Finn Community Health and Nutrition Survey                       | 1990 | 1990 | Finland | Information not reported | 1000 | 0  | 100 | Yes | Yes | Household availability/<br>budget survey | Nationally representative |
| GDD 2010 | FINDIET 1992                                                     | 1992 | 1992 | Finland | Information not reported | 1000 | 25 | 64  | Yes | Yes | Multiple 24-hour recall                  | Nationally representative |
| GDD 2010 | Finn Community Health and Nutrition Survey                       | 1998 | 1998 | Finland | Information not reported | 1000 | 0  | 100 | Yes | Yes | Household availability/<br>budget survey | Nationally representative |
| GDD 2010 | FINDIET 2002                                                     | 2002 | 2002 | Finland | Information not reported | 1000 | 25 | 64  | Yes | Yes | Multiple 24-hour recall                  | Nationally representative |
| GDD 2010 | Type 1 Diabetes Prediction and Prevention (DIPP) Nutrition Study | 2003 | 2005 | Finland | Information not reported | 1000 | 4  | 6   | Yes | Yes | Multiple 24-hour recall                  | Nationally representative |
| GDD 2010 | FINDIET 2007                                                     | 2007 | 2007 | Finland | Information not reported | 1000 | 25 | 74  | Yes | Yes | Multiple 24-hour recall                  | Nationally representative |
| GDD 2010 | TRANSFAIR study                                                  | 1992 | 1992 | Finland | Information not reported | 500  | 25 | 64  | Yes | Yes | Single 24-hour recall                    | Nationally representative |

|          |                                                                              |      |      |         |                                 |      |    |    |     |     |                                |                                      |
|----------|------------------------------------------------------------------------------|------|------|---------|---------------------------------|------|----|----|-----|-----|--------------------------------|--------------------------------------|
| GDD 2010 | INTERSALT, Turku                                                             | 1985 | 1987 | Finland | <i>Information not reported</i> | 25   | 20 | 59 | Yes | Yes | <i>Biomarker</i>               | <i>Sub-nationally representative</i> |
| GDD 2010 | Laatikainen et al. (2 of 11)                                                 | 1982 | 1982 | Finland | <i>Information not reported</i> | 247  | 25 | 64 | Yes | Yes | <i>Biomarker</i>               | <i>Sub-nationally representative</i> |
| GDD 2010 | Laatikainen et al. (3 of 11)                                                 | 1987 | 1987 | Finland | <i>Information not reported</i> | 199  | 25 | 64 | Yes | Yes | <i>Biomarker</i>               | <i>Sub-nationally representative</i> |
| GDD 2010 | Laatikainen et al. (4 of 11)                                                 | 2002 | 2002 | Finland | <i>Information not reported</i> | 168  | 25 | 64 | Yes | Yes | <i>Biomarker</i>               | <i>Sub-nationally representative</i> |
| GDD 2010 | Laatikainen et al. (6 of 11)                                                 | 1982 | 1982 | Finland | <i>Information not reported</i> | 213  | 25 | 64 | Yes | Yes | <i>Biomarker</i>               | <i>Sub-nationally representative</i> |
| GDD 2010 | Laatikainen et al. (7 of 11)                                                 | 1987 | 1987 | Finland | <i>Information not reported</i> | 180  | 25 | 64 | Yes | Yes | <i>Biomarker</i>               | <i>Sub-nationally representative</i> |
| GDD 2010 | Laatikainen et al. (8 of 11)                                                 | 1982 | 1982 | Finland | <i>Information not reported</i> | 232  | 25 | 64 | Yes | Yes | <i>Biomarker</i>               | <i>Sub-nationally representative</i> |
| GDD 2010 | Laatikainen et al. (9 of 11)                                                 | 1987 | 1987 | Finland | <i>Information not reported</i> | 150  | 25 | 64 | Yes | Yes | <i>Biomarker</i>               | <i>Sub-nationally representative</i> |
| GDD 2010 | Laatikainen et al. (11 of 11)                                                | 2002 | 2002 | Finland | <i>Information not reported</i> | 127  | 25 | 64 | Yes | Yes | <i>Biomarker</i>               | <i>Sub-nationally representative</i> |
| GDD 2010 | Reinivuo et al.                                                              | 2002 | 2002 | Finland | <i>Information not reported</i> | 168  | 25 | 64 | Yes | Yes | <i>Multiple 24-hour recall</i> | <i>Sub-nationally representative</i> |
| GDD 2010 | Reinivuo et al.                                                              | 2002 | 2002 | Finland | <i>Information not reported</i> | 128  | 25 | 64 | Yes | Yes | <i>Multiple 24-hour recall</i> | <i>Sub-nationally representative</i> |
| GDD 2010 | Reinivuo et al.                                                              | 2002 | 2002 | Finland | <i>Information not reported</i> | 127  | 25 | 64 | Yes | Yes | <i>Multiple 24-hour recall</i> | <i>Sub-nationally representative</i> |
| GDD 2010 | INTERSALT, Joensuu                                                           | 1985 | 1987 | Finland | <i>Information not reported</i> | 25   | 20 | 59 | Yes | Yes | <i>Biomarker</i>               | <i>Sub-nationally representative</i> |
| GDD 2010 | Laatikainen et al. (10 of 11)                                                | 2002 | 2002 | Finland | <i>Information not reported</i> | 128  | 25 | 64 | Yes | Yes | <i>Biomarker</i>               | <i>Sub-nationally representative</i> |
| GDD 2017 | Etude nationale nutrition santé (ENNS); National Nutrition and Health survey | 2006 | 2007 | France  | <i>Both urban and rural</i>     | 4429 | 3  | 75 | Yes | Yes | <i>Multiple 24-hour recall</i> | <i>Nationally representative</i>     |
| GDD 2017 | Health Behavior in School-Aged Children 1994                                 | 1993 | 1994 | France  | <i>Both urban and rural</i>     | 4004 | 11 | 16 | Yes | Yes | <i>FFQ</i>                     | <i>Nationally representative</i>     |
| GDD 2017 | Health Behavior in School-Aged Children 1998                                 | 1998 | 1998 | France  | <i>Both urban and rural</i>     | 4133 | 11 | 16 | Yes | Yes | <i>FFQ</i>                     | <i>Sub-nationally representative</i> |
| GDD 2017 | Health Behavior in School-Aged Children 2002                                 | 2001 | 2002 | France  | <i>Both urban and rural</i>     | 8185 | 10 | 16 | Yes | Yes | <i>FFQ</i>                     | <i>Nationally representative</i>     |
| GDD 2017 | Health Behavior in School-Aged Children 2006                                 | 2006 | 2006 | France  | <i>Both urban and rural</i>     | 7094 | 11 | 15 | Yes | Yes | <i>FFQ</i>                     | <i>Nationally representative</i>     |

|          |                                                                             |      |      |         |                          |       |    |     |     |     |                         |                               |
|----------|-----------------------------------------------------------------------------|------|------|---------|--------------------------|-------|----|-----|-----|-----|-------------------------|-------------------------------|
| GDD 2017 | Health Behavior in School-Aged Children 2010                                | 2010 | 2010 | France  | Both urban and rural     | 6073  | 11 | 15  | Yes | Yes | FFQ                     | Nationally representative     |
| GDD 2010 | Enquete Individuelle et Nationale sur les Consommations Alimentaires        | 1999 | 1999 | France  | Information not reported | 1000  | 16 | 64  | Yes | Yes | Multiple 24-hour recall | Nationally representative     |
| GDD 2010 | Etude nationale nutrition sant (ENNS); National Nutrition and Health survey | 2006 | 2007 | France  | Information not reported | 1000  | 4  | 74  | Yes | Yes | Multiple 24-hour recall | Nationally representative     |
| GDD 2010 | TRANSFAIR study                                                             | 1993 | 1994 | France  | Information not reported | 250   | 19 | 64  | Yes | Yes | Single 24-hour recall   | Nationally representative     |
| GDD 2010 | du Cailar et al.                                                            | 2001 | 2001 | France  | Information not reported | 438   | 20 | 70  | Yes | Yes | Biomarker               | Locally representative        |
| GDD 2010 | Meneton et al. (1 of 2)                                                     | 1998 | 1999 | France  | Information not reported | 672   | 20 | 92  | Yes | Yes | Multiple 24-hour recall | Nationally representative     |
| GDD 2017 | Demographic and Health Survey Gabon 2012                                    | 2012 | 2012 | Gabon   | Both urban and rural     | 15968 | 0  | 59  | Yes | Yes | DHS questionnaire       | Nationally representative     |
| GDD 2017 | Demographic and Health Survey Gabon 2000                                    | 2000 | 2001 | Gabon   | Both urban and rural     | 2603  | 0  | 4   | Yes | Yes | DHS questionnaire       | Nationally representative     |
| GDD 2010 | STEP Gabon                                                                  | 2009 | 2009 | Gabon   | Information not reported | 1000  | 15 | 64  | Yes | Yes | FFQ                     | Sub-nationally representative |
| GDD 2017 | DHS VI                                                                      | 2013 | 2013 | Gambia  | Both urban and rural     | 15579 | 0  | 96  | Yes | Yes | DHS questionnaire       | Nationally representative     |
| GDD 2017 | World Health Survey 2003                                                    | 2003 | 2003 | Georgia | Both urban and rural     | 2399  | 18 | 102 | Yes | Yes | FFQ                     | Nationally representative     |
| GDD 2010 | Living Conditions Lifestyles and Health                                     | 2001 | 2002 | Georgia | Information not reported | 1000  | 18 | 99  | Yes | Yes | FFQ                     | Nationally representative     |
| GDD 2017 | German Nutrition Survey 1998                                                | 1997 | 1999 | Germany | Both urban and rural     | 4030  | 15 | 85  | Yes | Yes | FFQ                     | Nationally representative     |
| GDD 2017 | EsKiMo                                                                      | 2006 | 2006 | Germany | Both urban and rural     | 1272  | 12 | 17  | Yes | Yes | FFQ                     | Nationally representative     |
| GDD 2017 | Health Behavior in School-Aged Children 1994                                | 1993 | 1994 | Germany | Both urban and rural     | 3275  | 11 | 16  | Yes | Yes | FFQ                     | Nationally representative     |
| GDD 2017 | Health Behavior in School-Aged Children 1998                                | 1998 | 1998 | Germany | Both urban and rural     | 4781  | 10 | 16  | Yes | Yes | FFQ                     | Sub-nationally representative |
| GDD 2017 | Health Behavior in School-Aged Children 2002                                | 2001 | 2002 | Germany | Both urban and rural     | 5635  | 11 | 17  | Yes | Yes | FFQ                     | Nationally representative     |

|          |                                                            |      |      |         |                          |      |    |     |     |     |                                          |                               |
|----------|------------------------------------------------------------|------|------|---------|--------------------------|------|----|-----|-----|-----|------------------------------------------|-------------------------------|
| GDD 2017 | Health Behavior in School-Aged Children 2006               | 2006 | 2006 | Germany | Both urban and rural     | 7169 | 11 | 15  | Yes | Yes | FFQ                                      | Nationally representative     |
| GDD 2017 | Health Behavior in School-Aged Children 2010               | 2010 | 2010 | Germany | Both urban and rural     | 4942 | 11 | 15  | Yes | Yes | FFQ                                      | Nationally representative     |
| GDD 2010 | German Community Health and Nutrition Survey               | 1988 | 1988 | Germany | Information not reported | 1000 | 0  | 100 | Yes | Yes | Household availability/<br>budget survey | Nationally representative     |
| GDD 2010 | German Community Health and Nutrition Survey               | 1993 | 1993 | Germany | Information not reported | 1000 | 0  | 100 | Yes | Yes | Household availability/<br>budget survey | Nationally representative     |
| GDD 2010 | German Nutrition Survey 1998                               | 1997 | 1999 | Germany | Information not reported | 1000 | 20 | 79  | Yes | Yes | FFQ                                      | Nationally representative     |
| GDD 2010 | German Nutrition Survey 1998                               | 1997 | 1999 | Germany | Information not reported | 1000 | 18 | 64  | Yes | Yes | FFQ                                      | Nationally representative     |
| GDD 2010 | German Community Health and Nutrition Survey               | 1998 | 1998 | Germany | Information not reported | 1000 | 0  | 100 | Yes | Yes | Household availability/<br>budget survey | Nationally representative     |
| GDD 2010 | Nationale Verzehrsstudie II                                | 2005 | 2007 | Germany | Information not reported | 1000 | 15 | 100 | Yes | Yes | Multiple 24-<br>hour recall              | Nationally representative     |
| GDD 2010 | Nationale Verzehrs Studie II, Ergebnisbericht, Teil 2      | 2005 | 2006 | Germany | Information not reported | 510  | 20 | 80  | Yes | Yes | Multiple 24-<br>hour recall              | Nationally representative     |
| GDD 2010 | EsKiMo Ernährungstudie als KIGGS-Modul                     | 2006 | 2006 | Germany | Information not reported | 1000 | 6  | 14  | Yes | Yes | Multiple 24-<br>hour recall              | Nationally representative     |
| GDD 2010 | TRANSFAIR study                                            | 1991 | 1991 | Germany | Information not reported | 500  | 19 | 64  | Yes | Yes | Single 24-<br>hour recall                | Nationally representative     |
| GDD 2010 | INTERSALT, Bernried                                        | 1985 | 1987 | Germany | Information not reported | 25   | 20 | 59  | Yes | Yes | Biomarker                                | Sub-nationally representative |
| GDD 2010 | INTERSALT, Cottbus                                         | 1985 | 1987 | Germany | Information not reported | 25   | 20 | 59  | Yes | Yes | Biomarker                                | Sub-nationally representative |
| GDD 2010 | INTERSALT, Heidelberg                                      | 1985 | 1987 | Germany | Information not reported | 22   | 20 | 59  | Yes | Yes | Biomarker                                | Sub-nationally representative |
| GDD 2017 | Modeling the Epidemiologic Transition Study (METS) - Ghana | 2010 | 2012 | Ghana   | Only rural               | 944  | 23 | 45  | Yes | Yes | Multiple 24-<br>hour recall              | Locally representative        |
| GDD 2017 | Demographic and Health Survey 2003                         | 2003 | 2003 | Ghana   | Both urban and rural     | 3403 | 0  | 4   | Yes | Yes | DHS questionnaire                        | Nationally representative     |

|          |                                                            |      |      |        |                          |      |    |     |     |     |                                      |                               |
|----------|------------------------------------------------------------|------|------|--------|--------------------------|------|----|-----|-----|-----|--------------------------------------|-------------------------------|
| GDD 2017 | Demographic and Health Survey 2008                         | 2008 | 2008 | Ghana  | Both urban and rural     | 7025 | 0  | 49  | Yes | Yes | DHS questionnaire                    | Nationally representative     |
| GDD 2017 | Demographic and Health Survey 2014                         | 2014 | 2014 | Ghana  | Both urban and rural     | 9153 | 0  | 49  | Yes | Yes | DHS questionnaire                    | Nationally representative     |
| GDD 2017 | Global School-Based Student Health Survey 2007             | 2007 | 2007 | Ghana  | Both urban and rural     | 5989 | 11 | 16  | Yes | Yes | FFQ                                  | Nationally representative     |
| GDD 2017 | Global School-Based Student Health Survey Junior High 2012 | 2012 | 2012 | Ghana  | Both urban and rural     | 1616 | 11 | 18  | Yes | Yes | FFQ                                  | Nationally representative     |
| GDD 2017 | Global School-Based Student Health Survey Senior High 2012 | 2012 | 2012 | Ghana  | Both urban and rural     | 1962 | 12 | 18  | Yes | Yes | FFQ                                  | Nationally representative     |
| GDD 2017 | World Health Survey 2003                                   | 2003 | 2003 | Ghana  | Both urban and rural     | 3220 | 18 | 107 | Yes | Yes | FFQ                                  | Nationally representative     |
| GDD 2017 | Study on Global Ageing and Adult Health                    | 2007 | 2008 | Ghana  | Both urban and rural     | 5051 | 18 | 120 | Yes | Yes | FFQ                                  | Nationally representative     |
| GDD 2010 | Kerry et al. ( 1 of 2)                                     | 2001 | 2002 | Ghana  | Information not reported | 481  | 40 | 75  | Yes | Yes | Biomarker                            | Sub-nationally representative |
| GDD 2010 | Kerry et al. ( 2 of 2)                                     | 2001 | 2002 | Ghana  | Information not reported | 532  | 40 | 75  | Yes | Yes | Biomarker                            | Locally representative        |
| GDD 2017 | Health Behavior in School-Aged Children 1998               | 1998 | 1998 | Greece | Both urban and rural     | 4211 | 11 | 17  | Yes | Yes | FFQ                                  | Nationally representative     |
| GDD 2017 | Health Behavior in School-Aged Children 2002               | 2001 | 2002 | Greece | Both urban and rural     | 3807 | 11 | 16  | Yes | Yes | FFQ                                  | Nationally representative     |
| GDD 2017 | Health Behavior in School-Aged Children 2006               | 2006 | 2006 | Greece | Both urban and rural     | 3673 | 11 | 15  | Yes | Yes | FFQ                                  | Nationally representative     |
| GDD 2017 | Health Behavior in School-Aged Children 2010               | 2010 | 2010 | Greece | Both urban and rural     | 4886 | 11 | 15  | Yes | Yes | FFQ                                  | Nationally representative     |
| GDD 2010 | Greek Community Health Survey and Nutrition Nutrition      | 1981 | 1981 | Greece | Information not reported | 1000 | 0  | 100 | Yes | Yes | Household availability/budget survey | Nationally representative     |
| GDD 2010 | Greek Community Health Survey and Nutrition Nutrition      | 1987 | 1987 | Greece | Information not reported | 1000 | 0  | 100 | Yes | Yes | Household availability/budget survey | Nationally representative     |

|          |                                                                                            |      |      |           |                                 |      |    |     |     |     |                                             |                                      |
|----------|--------------------------------------------------------------------------------------------|------|------|-----------|---------------------------------|------|----|-----|-----|-----|---------------------------------------------|--------------------------------------|
| GDD 2010 | Greek component of the European Prospective Investigation into Cancer and Nutrition (EPIC) | 1994 | 1999 | Greece    | <i>Information not reported</i> | 1000 | 25 | 84  | Yes | Yes | FFQ                                         | <i>Locally representative</i>        |
| GDD 2010 | Greek component of the European Prospective Investigation into Cancer and Nutrition (EPIC) | 1994 | 1999 | Greece    | <i>Information not reported</i> | 1000 | 19 | 84  | Yes | Yes | FFQ                                         | <i>Locally representative</i>        |
| GDD 2010 | Multi-centre study of the Mediterranean Group for the Study of Diabetes (MGSD)             | 1995 |      | Greece    | <i>Information not reported</i> | 500  | 25 | 74  | Yes | Yes | FFQ                                         | <i>Sub-nationally representative</i> |
| GDD 2010 | Greek Community Health Survey and Nutrition Nutrition                                      | 1998 | 1998 | Greece    | <i>Information not reported</i> | 1000 | 0  | 100 | Yes | Yes | <i>Household availability/budget survey</i> | <i>Nationally representative</i>     |
| GDD 2010 | ATTICA Study                                                                               | 2001 | 2002 | Greece    | <i>Information not reported</i> | 1000 | 18 | 75  | Yes | Yes | FFQ                                         | <i>Sub-nationally representative</i> |
| GDD 2010 | The GENESIS study                                                                          | 2003 | 2004 | Greece    | <i>Information not reported</i> | 1000 | 1  | 5   | Yes | Yes | <i>Multiple 24-hour recall</i>              | <i>Nationally representative</i>     |
| GDD 2010 | Greek Community Health Survey and Nutrition Nutrition                                      | 2004 | 2004 | Greece    | <i>Information not reported</i> | 1000 | 0  | 100 | Yes | Yes | <i>Household availability/budget survey</i> | <i>Nationally representative</i>     |
| GDD 2010 | TRANSFAIR study                                                                            | 1995 | 1995 | Greece    | <i>Information not reported</i> | 100  | 23 | 64  | Yes | Yes | <i>Single 24-hour recall</i>                | <i>Nationally representative</i>     |
| GDD 2017 | Health Behavior in School-Aged Children 1994                                               | 1993 | 1994 | Greenland | <i>Both urban and rural</i>     | 1306 | 11 | 16  | Yes | Yes | FFQ                                         | <i>Nationally representative</i>     |
| GDD 2017 | Health Behavior in School-Aged Children 1998                                               | 1998 | 1998 | Greenland | <i>Both urban and rural</i>     | 1629 | 11 | 17  | Yes | Yes | FFQ                                         | <i>Nationally representative</i>     |
| GDD 2017 | Health Behavior in School-Aged Children 2002                                               | 2001 | 2002 | Greenland | <i>Both urban and rural</i>     | 873  | 11 | 17  | Yes | Yes | FFQ                                         | <i>Nationally representative</i>     |
| GDD 2017 | Health Behavior in School-Aged Children 2006                                               | 2006 | 2006 | Greenland | <i>Both urban and rural</i>     | 1321 | 11 | 15  | Yes | Yes | FFQ                                         | <i>Nationally representative</i>     |
| GDD 2017 | Health Behavior in School-Aged Children 2010                                               | 2010 | 2010 | Greenland | <i>Both urban and rural</i>     | 1158 | 11 | 15  | Yes | Yes | FFQ                                         | <i>Nationally representative</i>     |
| GDD 2010 | Inuit Health in Transition                                                                 | 2005 | 2009 | Greenland | <i>Information not reported</i> | 1000 | 20 | 89  | Yes | Yes | FFQ                                         | <i>Nationally representative</i>     |



|          |                                                     |      |      |           |                          |       |    |    |     |     |                         |                               |
|----------|-----------------------------------------------------|------|------|-----------|--------------------------|-------|----|----|-----|-----|-------------------------|-------------------------------|
| GDD 2017 | Global Student Based Student Health Survey 2008     | 2008 | 2008 | Grenada   | Both urban and rural     | 1517  | 11 | 16 | Yes | Yes | FFQ                     | Nationally representative     |
| GDD 2017 | Mam Mamas                                           | 2012 | 2013 | Guatemala | Only rural               | 299   | 14 | 42 | No  | Yes | Multiple 24-hour recall | Locally representative        |
| GDD 2017 | Xela Babies                                         | 2011 | 2011 | Guatemala | Only urban               | 330   | 0  | 2  | Yes | Yes | Single 24-hour recall   | Locally representative        |
| GDD 2017 | Non-pregnant & non-lactating women vitamin A survey | 2014 | 2014 | Guatemala | Both urban and rural     | 250   | 18 | 45 | No  | Yes | Single 24-hour recall   | Locally representative        |
| GDD 2017 | Global Student Based Student Health Survey 2009     | 2009 | 2009 | Guatemala | Both urban and rural     | 5447  | 11 | 16 | Yes | Yes | FFQ                     | Nationally representative     |
| GDD 2017 | World Health Survey 2003                            | 2003 | 2003 | Guatemala | Both urban and rural     | 4093  | 18 | 99 | Yes | Yes | FFQ                     | Nationally representative     |
| GDD 2017 | Demographic and Health Survey Guatemala 2014        | 2014 | 2015 | Guatemala | Both urban and rural     | 37909 | 0  | 49 | Yes | Yes | DHS questionnaire       | Nationally representative     |
| GDD 2017 | Demographic and Health Survey Guatemala 1995        | 1995 | 1995 | Guatemala | Both urban and rural     | 5789  | 0  | 4  | Yes | Yes | DHS questionnaire       | Nationally representative     |
| GDD 2017 | Demographic and Health Survey Guatemala 1998        | 1998 | 1999 | Guatemala | Both urban and rural     | 2908  | 0  | 4  | Yes | Yes | DHS questionnaire       | Nationally representative     |
| GDD 2010 | Melse-Boonstra et al. (4 of 4)                      | 1996 | 1996 | Guatemala | Information not reported | 7     | 25 | 55 | No  | Yes | Biomarker               | Sub-nationally representative |
| GDD 2017 | Demographic and Health Survey Guinea 2005           | 2005 | 2005 | Guinea    | Both urban and rural     | 11987 | 0  | 59 | Yes | Yes | DHS questionnaire       | Nationally representative     |
| GDD 2017 | Demographic and Health Survey Guinea 2012           | 2012 | 2012 | Guinea    | Both urban and rural     | 13623 | 0  | 59 | Yes | Yes | DHS questionnaire       | Nationally representative     |
| GDD 2017 | Demographic and Health Survey Guinea 1999           | 1999 | 1999 | Guinea    | Both urban and rural     | 3597  | 0  | 4  | Yes | Yes | DHS questionnaire       | Nationally representative     |
| GDD 2017 | Global Student Based Student Health Survey 2004     | 2004 | 2004 | Guyana    | Both urban and rural     | 1189  | 11 | 16 | Yes | Yes | FFQ                     | Nationally representative     |
| GDD 2017 | Global Student Based Student Health Survey 2010     | 2010 | 2010 | Guyana    | Both urban and rural     | 2357  | 11 | 16 | Yes | Yes | FFQ                     | Nationally representative     |
| GDD 2017 | Demographic and Health Survey Guyana 2009           | 2009 | 2009 | Guyana    | Both urban and rural     | 2839  | 0  | 47 | Yes | Yes | DHS questionnaire       | Nationally representative     |

|          |                                                     |      |      |          |                          |       |    |     |     |     |                         |                           |
|----------|-----------------------------------------------------|------|------|----------|--------------------------|-------|----|-----|-----|-----|-------------------------|---------------------------|
| GDD 2017 | Demographic and Health Survey Haiti 1995            | 1995 | 1995 | Haiti    | Both urban and rural     | 998   | 0  | 2   | Yes | Yes | DHS questionnaire       | Nationally representative |
| GDD 2017 | Demographic and Health Survey Haiti 2000            | 2000 | 2000 | Haiti    | Both urban and rural     | 10789 | 0  | 49  | Yes | Yes | DHS questionnaire       | Nationally representative |
| GDD 2017 | Demographic and Health Survey Haiti 2005            | 2005 | 2006 | Haiti    | Both urban and rural     | 11647 | 0  | 49  | Yes | Yes | DHS questionnaire       | Nationally representative |
| GDD 2017 | Demographic and Health Survey Haiti 2012            | 2012 | 2012 | Haiti    | Both urban and rural     | 14796 | 0  | 49  | Yes | Yes | DHS questionnaire       | Nationally representative |
| GDD 2017 | Global Student Based Student Health Survey 2012     | 2012 | 2012 | Honduras | Both urban and rural     | 1742  | 11 | 16  | Yes | Yes | FFQ                     | Nationally representative |
| GDD 2017 | Demographic and Health Survey Honduras 2005         | 2005 | 2006 | Honduras | Both urban and rural     | 28876 | 0  | 49  | Yes | Yes | DHS questionnaire       | Nationally representative |
| GDD 2017 | Demographic and Health Survey Honduras 2011         | 2011 | 2012 | Honduras | Both urban and rural     | 31660 | 0  | 49  | Yes | Yes | DHS questionnaire       | Nationally representative |
| GDD 2017 | World Health Survey 2003                            | 2003 | 2003 | Hungary  | Both urban and rural     | 1398  | 18 | 95  | Yes | Yes | FFQ                     | Nationally representative |
| GDD 2017 | Health Behavior in School-Aged Children 1986        | 1985 | 1986 | Hungary  | Both urban and rural     | 4461  | 11 | 15  | Yes | Yes | FFQ                     | Nationally representative |
| GDD 2017 | Health Behavior in School-Aged Children 1990        | 1989 | 1990 | Hungary  | Both urban and rural     | 6498  | 11 | 17  | Yes | Yes | FFQ                     | Nationally representative |
| GDD 2017 | Health Behavior in School-Aged Children 1998        | 1998 | 1998 | Hungary  | Both urban and rural     | 3601  | 11 | 17  | Yes | Yes | FFQ                     | Nationally representative |
| GDD 2017 | Health Behavior in School-Aged Children 2002        | 2001 | 2002 | Hungary  | Both urban and rural     | 4057  | 11 | 17  | Yes | Yes | FFQ                     | Nationally representative |
| GDD 2017 | Health Behavior in School-Aged Children 2006        | 2006 | 2006 | Hungary  | Both urban and rural     | 3472  | 11 | 15  | Yes | Yes | FFQ                     | Nationally representative |
| GDD 2017 | Health Behavior in School-Aged Children 2010        | 2010 | 2010 | Hungary  | Both urban and rural     | 4767  | 11 | 15  | Yes | Yes | FFQ                     | Nationally representative |
| GDD 2010 | The First Hungarian Representative Nutrition Survey | 1985 | 1988 | Hungary  | Information not reported | 1000  | 15 | 100 | Yes | Yes | Multiple 24-hour recall | Nationally representative |

|          |                                                                                |      |      |         |                          |       |    |     |     |     |                                          |                               |
|----------|--------------------------------------------------------------------------------|------|------|---------|--------------------------|-------|----|-----|-----|-----|------------------------------------------|-------------------------------|
| GDD 2010 | Hungarian Community Health and Nutrition Survey                                | 1991 | 1991 | Hungary | Information not reported | 1000  | 0  | 100 | Yes | Yes | Household availability/<br>budget survey | Nationally representative     |
| GDD 2010 | The 2nd National Hungarian Survey                                              | 1992 | 1994 | Hungary | Information not reported | 1000  | 18 | 100 | Yes | Yes | Multiple 24-hour recall                  | Nationally representative     |
| GDD 2010 | The 3rd National Hungarian Survey                                              | 2003 | 2003 | Hungary | Information not reported | 1000  | 18 | 100 | Yes | Yes | Multiple 24-hour recall                  | Nationally representative     |
| GDD 2010 | The 3rd National Hungarian Survey                                              | 2003 | 2004 | Hungary | Information not reported | 1000  | 18 | 64  | Yes | Yes | Multiple 24-hour recall                  | Nationally representative     |
| GDD 2010 | The 3rd National Hungarian Survey                                              | 2005 | 2006 | Hungary | Information not reported | 100   | 11 | 14  | Yes | Yes | Multiple 24-hour recall                  | Nationally representative     |
| GDD 2010 | The 3rd National Hungarian Survey                                              | 2003 | 2004 | Hungary | Information not reported | 1000  | 18 | 100 | Yes | Yes | Multiple 24-hour recall                  | Nationally representative     |
| GDD 2010 | The 3rd National Hungarian Survey                                              | 2003 | 2004 | Hungary | Information not reported | 250   | 60 | 100 | Yes | Yes | Multiple 24-hour recall                  | Nationally representative     |
| GDD 2010 | INTERSALT, Porcsalam village                                                   | 1985 | 1987 | Hungary | Information not reported | 25    | 20 | 59  | Yes | Yes | Biomarker                                | Locally representative        |
| GDD 2017 | Health Behavior in School-Aged Children 2006                                   | 2006 | 2006 | Iceland | Both urban and rural     | 9444  | 11 | 15  | Yes | Yes | FFQ                                      | Nationally representative     |
| GDD 2017 | Health Behavior in School-Aged Children 2010                                   | 2010 | 2010 | Iceland | Both urban and rural     | 11013 | 11 | 15  | Yes | Yes | FFQ                                      | Nationally representative     |
| GDD 2010 | Dietary Survey of the Icelanders                                               | 1990 | 1990 | Iceland | Information not reported | 1000  | 15 | 80  | Yes | Yes | Single 24-hour recall                    | Nationally representative     |
| GDD 2010 | Diet of Icelandic schoolchildren                                               | 1992 | 1993 | Iceland | Information not reported | 1000  | 9  | 15  | Yes | Yes | Single 24-hour recall                    | Nationally representative     |
| GDD 2010 | Research on infant nutrition in Iceland                                        | 1995 | 1997 | Iceland | Information not reported | 100   | 1  | 1   | Yes | Yes | Multiple 24-hour recall                  | Nationally representative     |
| GDD 2010 | The Diet of Icelanders, Dietary Survey of The Icelandic Nutrition Council 2002 | 2002 | 2002 | Iceland | Information not reported | 1000  | 15 | 80  | Yes | Yes | Single 24-hour recall                    | Nationally representative     |
| GDD 2010 | Diet of Icelandic 9- and 15-year-old children and adolescents                  | 2003 | 2004 | Iceland | Information not reported | 250   | 9  | 15  | Yes | Yes | Multiple 24-hour recall                  | Nationally representative     |
| GDD 2010 | The diet of Icelandic infants                                                  | 2005 | 2007 | Iceland | Information not reported | 100   | 1  | 1   | Yes | Yes | Multiple 24-hour recall                  | Nationally representative     |
| GDD 2010 | TRANSFAIR study                                                                | 1990 | 1990 | Iceland | Information not reported | 250   | 19 | 64  | Yes | Yes | Single 24-hour recall                    | Nationally representative     |
| GDD 2010 | INTERSALT, Reykjavik and district                                              | 1985 | 1987 | Iceland | Information not reported | 25    | 20 | 59  | Yes | Yes | Biomarker                                | Sub-nationally representative |
| GDD 2010 | Olafsdottir                                                                    | 2003 | 2003 | Iceland | Information not reported | 60    | 25 | 53  | No  | Yes | Biomarker                                | Sub-nationally representative |

|          |                                                                                                                                                        |      |      |         |                                 |      |    |     |     |     |                                |                                      |
|----------|--------------------------------------------------------------------------------------------------------------------------------------------------------|------|------|---------|---------------------------------|------|----|-----|-----|-----|--------------------------------|--------------------------------------|
| GDD 2010 | Olfasdottir et al.                                                                                                                                     | 2003 | 2003 | Iceland | <i>Information not reported</i> | 60   | 25 | 55  | No  | Yes | <i>Single 24-hour recall</i>   | <i>Sub-nationally representative</i> |
| GDD 2017 | Micronutrient status of rural and tribal nonpregnant women                                                                                             | 2007 | 2007 | India   | <i>Both urban and rural</i>     | 109  | 18 | 30  | No  | Yes | <i>Single 24-hour recall</i>   | <i>Sub-nationally representative</i> |
| GDD 2017 | Micronutrient status of tribal pregnant women                                                                                                          | 2008 | 2009 | India   | <i>Only rural</i>               | 440  | 18 | 32  | No  | Yes | <i>Multiple 24-hour recall</i> | <i>Locally representative</i>        |
| GDD 2017 | Urban School girls                                                                                                                                     | 2005 | 2007 | India   | <i>Only urban</i>               | 608  | 10 | 16  | No  | Yes | <i>Multiple 24-hour recall</i> | <i>Locally representative</i>        |
| GDD 2017 | Urban children                                                                                                                                         | 2008 | 2009 | India   | <i>Only urban</i>               | 935  | 2  | 18  | Yes | Yes | <i>Single 24-hour recall</i>   | <i>Locally representative</i>        |
| GDD 2017 | Nutrition and health of adults                                                                                                                         | 1998 | 2000 | India   | <i>Both urban and rural</i>     | 629  | 18 | 65  | Yes | Yes | FFQ                            | <i>Locally representative</i>        |
| GDD 2017 | Prevention of type 2 diabetes in women with pre-diabetes using vitamin D supplementation and lifestyle intervention in North India (PREVENT-WIN Study) | 2013 | 2017 | India   | <i>Only urban</i>               | 134  | 20 | 60  | No  | Yes | <i>Single 24-hour recall</i>   | <i>Locally representative</i>        |
| GDD 2017 | Prevalence of Coronary Heart Disease (CHD) and Its Risk Factors in Residents of Urban and Rural Areas of National Capital Region – A Repeat Survey     | 2010 | 2012 | India   | <i>Only rural</i>               | 2604 | 30 | 105 | Yes | Yes | FFQ                            | <i>Locally representative</i>        |
| GDD 2017 | Urban School Children Survey                                                                                                                           | 2012 | 2012 | India   | <i>Only urban</i>               | 1405 | 6  | 15  | Yes | Yes | FFQ                            | <i>Locally representative</i>        |
| GDD 2017 | Risk of Jowar Consumption associated with severity of Dental Fluorosis in North Karnataka India                                                        | 2006 | 2009 | India   | <i>Only rural</i>               | 428  | 12 | 15  | Yes | Yes | FFQ                            | <i>Locally representative</i>        |
| GDD 2017 | Formative Research on Improved Maternal Nutrition (MN), Infant and Young Child (IYCF) and Household Sanitation and Hygiene (HSH) Practices in UP, 2016 | 2016 | 2016 | India   | <i>Both urban and rural</i>     | 360  | 1  | 38  | Yes | Yes | FFQ                            | <i>Sub-nationally representative</i> |
| GDD 2017 | Dietary Survey                                                                                                                                         | 2013 | 2014 | India   | <i>Only rural</i>               | 372  | 18 | 60  | No  | No  | <i>Single 24-hour recall</i>   | <i>Locally representative</i>        |

|          |                                                                  |      |      |           |                          |        |    |     |     |     |                         |                               |
|----------|------------------------------------------------------------------|------|------|-----------|--------------------------|--------|----|-----|-----|-----|-------------------------|-------------------------------|
| GDD 2017 | Attitudes and perceptions towards diet among children            | 2007 | 2008 | India     | Only urban               | 201    | 9  | 16  | Yes | Yes | Multiple 24-hour recall | Locally representative        |
| GDD 2017 | Indian Multicentre Urban Survey                                  | 2011 | 2012 | India     | Only urban               | 791    | 2  | 18  | Yes | Yes | Single 24-hour recall   | Nationally representative     |
| GDD 2017 | Demographic and Health Survey 1998                               | 1998 | 1999 | India     | Both urban and rural     | 241716 | 0  | 49  | Yes | Yes | DHS questionnaire       | Nationally representative     |
| GDD 2017 | Demographic and Health Survey 2005                               | 2005 | 2006 | India     | Both urban and rural     | 235520 | 0  | 54  | Yes | Yes | DHS questionnaire       | Nationally representative     |
| GDD 2017 | Global School-Based Student Health Survey                        | 2007 | 2007 | India     | Both urban and rural     | 8010   | 11 | 16  | Yes | Yes | FFQ                     | Nationally representative     |
| GDD 2017 | India World Health Study 2003                                    | 2003 | 2003 | India     | Both urban and rural     | 8872   | 15 | 102 | Yes | Yes | FFQ                     | Nationally representative     |
| GDD 2017 | Study on Global Ageing and Adult Health                          | 2007 | 2007 | India     | Both urban and rural     | 11222  | 18 | 106 | Yes | Yes | FFQ                     | Nationally representative     |
| GDD 2010 | National Nutrition Monitoring Bureau (NNMB) Rural Surveys        | 1996 | 1997 | India     | Information not reported | 1000   | 20 | 100 | Yes | Yes | Single 24-hour recall   | Locally representative        |
| GDD 2010 | National Nutrition Monitoring Bureau (NNMB) Rural Surveys        | 2000 | 2001 | India     | Information not reported | 1027   | 20 | 100 | Yes | Yes | Single 24-hour recall   | Locally representative        |
| GDD 2010 | National Nutrition Monitoring Bureau (NNMB) Rural Surveys        | 2004 | 2006 | India     | Information not reported | 1238   | 20 | 100 | Yes | Yes | Single 24-hour recall   | Locally representative        |
| GDD 2010 | INTERSALT, Stok, Ladakh                                          | 1985 | 1987 | India     | Information not reported | 25     | 20 | 59  | Yes | Yes | Biomarker               | Sub-nationally representative |
| GDD 2010 | INTERSALT, New Delhi                                             | 1985 | 1987 | India     | Information not reported | 25     | 20 | 59  | Yes | Yes | Biomarker               | Sub-nationally representative |
| GDD 2010 | Radhika et al.                                                   | 2003 | 2003 | India     | Information not reported | 1902   | 20 | 79  | Yes | Yes | FFQ                     | Sub-nationally representative |
| GDD 2017 | Cardiovascular disease risk of adult in west Sumatera, Indonesia | 2006 | 2006 | Indonesia | Both urban and rural     | 800    | 18 | 90  | Yes | Yes | FFQ                     | Sub-nationally representative |
| GDD 2017 | Child growth and its relevant factors                            | 2000 | 2004 | Indonesia | Only rural               | 126    | 1  | 12  | Yes | Yes | Multiple 24-hour recall | Locally representative        |
| GDD 2017 | Double Burden of Nutrition in Indonesia                          | 2006 | 2007 | Indonesia | Both urban and rural     | 928    | 2  | 75  | Yes | Yes | FFQ                     | Locally representative        |
| GDD 2017 | SEANUTS: South East Asian Nutrition Surveys                      | 2010 | 2011 | Indonesia | Both urban and rural     | 3600   | 0  | 12  | Yes | Yes | Single 24-hour recall   | Nationally representative     |

|          |                                                                                |      |      |                           |                          |       |    |     |     |     |                         |                               |
|----------|--------------------------------------------------------------------------------|------|------|---------------------------|--------------------------|-------|----|-----|-----|-----|-------------------------|-------------------------------|
| GDD 2017 | Global Student Based Student Health Survey 2007                                | 2007 | 2007 | Indonesia                 | Both urban and rural     | 3093  | 11 | 16  | Yes | Yes | FFQ                     | Nationally representative     |
| GDD 2017 | Demographic and Health Survey Indonesia 2002                                   | 2002 | 2003 | Indonesia                 | Both urban and rural     | 9886  | 0  | 4   | Yes | Yes | DHS questionnaire       | Nationally representative     |
| GDD 2017 | Demographic and Health Survey Indonesia 2012                                   | 2012 | 2012 | Indonesia                 | Both urban and rural     | 8665  | 0  | 4   | Yes | Yes | DHS questionnaire       | Nationally representative     |
| GDD 2017 | Demographic and Health Survey Indonesia 1987                                   | 1987 | 1987 | Indonesia                 | Both urban and rural     | 4491  | 0  | 4   | Yes | Yes | DHS questionnaire       | Nationally representative     |
| GDD 2017 | Demographic and Health Survey Indonesia 1991                                   | 1991 | 1991 | Indonesia                 | Both urban and rural     | 10081 | 0  | 4   | Yes | Yes | DHS questionnaire       | Nationally representative     |
| GDD 2017 | Demographic and Health Survey Indonesia 2007                                   | 2007 | 2008 | Indonesia                 | Both urban and rural     | 22570 | 0  | 49  | Yes | Yes | DHS questionnaire       | Nationally representative     |
| GDD 2010 | The determinant factors of hypertension among adult in West Sumatra, Indonesia | 2004 | 2004 | Indonesia                 | Information not reported | 250   | 18 | 90  | Yes | Yes | FFQ                     | Sub-nationally representative |
| GDD 2010 | Mustafa et al. (1 of 2)                                                        | 2003 | 2003 | Indonesia                 | Information not reported | 15    | 25 | 55  | No  | Yes | Biomarker               | Locally representative        |
| GDD 2017 | Isfahan Healthy Heart Program                                                  | 2007 | 2007 | Iran, Islamic Republic Of | Both urban and rural     | 1490  | 15 | 100 | Yes | Yes | Single 24-hour recall   | Sub-nationally representative |
| GDD 2017 | Prevalence of Obesity                                                          | 2004 | 2005 | Iran, Islamic Republic Of | Only urban               | 300   | 15 | 70  | Yes | Yes | FFQ                     | Sub-nationally representative |
| GDD 2017 | Yazd Health Study                                                              | 2014 | 2015 | Iran, Islamic Republic Of | Only urban               | 9876  | 1  | 5   | Yes | Yes | FFQ                     | Sub-nationally representative |
| GDD 2017 | Fluoride intake of 4 year old Iranian Children                                 | 1995 | 1996 | Iran, Islamic Republic Of | Both urban and rural     | 129   | 4  | 4   | Yes | Yes | Multiple 24-hour recall | Nationally representative     |
| GDD 2017 | Third Surveillance of Risk Factors of Non-Communicable Diseases (SuRFNC-2007)  | 2007 | 2007 | Iran, Islamic Republic Of | Both urban and rural     | 5149  | 14 | 64  | Yes | Yes | DHS questionnaire       | Nationally representative     |
| GDD 2017 | The CASPIAN IV study                                                           | 2012 | 2012 | Iran, Islamic Republic Of | Both urban and rural     | 13486 | 6  | 18  | Yes | Yes | Single 24-hour recall   | Nationally representative     |

|          |                                                                                                               |      |      |                           |                          |       |    |     |     |     |                         |                               |
|----------|---------------------------------------------------------------------------------------------------------------|------|------|---------------------------|--------------------------|-------|----|-----|-----|-----|-------------------------|-------------------------------|
| GDD 2017 | Dietary habits and gastric cancer risk in north                                                               | 2005 | 2007 | Iran, Islamic Republic Of | Both urban and rural     | 304   | 37 | 84  | Yes | Yes | FFQ                     | Sub-nationally representative |
| GDD 2017 | Tehran Lipid and Glucose Study                                                                                | 2005 | 2008 | Iran, Islamic Republic Of | Only urban               | 3425  | 3  | 84  | Yes | Yes | FFQ                     | Locally representative        |
| GDD 2017 | Tehran Lipid and Glucose Study                                                                                | 2009 | 2011 | Iran, Islamic Republic Of | Only urban               | 7214  | 3  | 87  | Yes | Yes | FFQ                     | Locally representative        |
| GDD 2017 | Tehran Lipid and Glucose Study                                                                                | 2012 | 2015 | Iran, Islamic Republic Of | Only urban               | 6530  | 3  | 90  | Yes | Yes | FFQ                     | Locally representative        |
| GDD 2017 | Fourth Surveillance of Risk Factors of Non-Communicable Diseases (SuRFNCD-2011)                               | 2011 | 2011 | Iran, Islamic Republic Of | Both urban and rural     | 11599 | 4  | 70  | Yes | Yes | FFQ                     | Nationally representative     |
| GDD 2017 | The Influence of Environmental Factors on Gastric Cancer in the Northwest of Iran                             | 2003 | 2005 | Iran, Islamic Republic Of | Both urban and rural     | 366   | 22 | 106 | Yes | Yes | FFQ                     | Sub-nationally representative |
| GDD 2010 | National Comprehensive Study on Household Food Consumption Pattern and Nutritional Status I.R.IRAN, 2001-2003 | 2001 | 2003 | Iran, Islamic Republic Of | Information not reported | 7158  | 0  | 100 | Yes | Yes | FFQ                     | Nationally representative     |
| GDD 2010 | Non communicable disease surveillance in Islamic Republic of Iran                                             | 2005 | 2005 | Iran, Islamic Republic Of | Information not reported | 3533  | 15 | 64  | Yes | Yes | Single 24-hour recall   | Nationally representative     |
| GDD 2010 | Comprehensive National Household Food Consumption Survey                                                      | 1990 | 1995 | Iran, Islamic Republic Of | Information not reported | 1000  | 0  | 100 | Yes | Yes | Multiple 24-hour recall | Nationally representative     |
| GDD 2010 | Consumption of trans fats and estimated effects on coronary heart disease in Iran                             | 2001 | 2003 | Iran, Islamic Republic Of | Information not reported | 1000  | 0  | 100 | Yes | Yes | Multiple 24-hour recall | Nationally representative     |
| GDD 2010 | Azizi et al. (1 of 2)                                                                                         | 1998 | 1998 | Iran, Islamic Republic Of | Information not reported | 340   | 20 | 79  | Yes | Yes | FFQ                     | Sub-nationally representative |
| GDD 2010 | Azizi et al. (2 of 2)                                                                                         | 1998 | 1998 | Iran, Islamic Republic Of | Information not reported | 343   | 20 | 79  | Yes | Yes | FFQ                     | Sub-nationally representative |

|          |                                                      |      |      |                           |                          |      |    |     |     |     |                                          |                               |
|----------|------------------------------------------------------|------|------|---------------------------|--------------------------|------|----|-----|-----|-----|------------------------------------------|-------------------------------|
| GDD 2010 | Rahmani et al.                                       | 2000 | 2000 | Iran, Islamic Republic Of | Information not reported | 644  | 20 | 79  | Yes | Yes | FFQ                                      | Sub-nationally representative |
| GDD 2010 | Rafiei et al.                                        | 2001 | 2001 | Iran, Islamic Republic Of | Information not reported | 304  | 20 | 60  | Yes | Yes | Biomarker                                | Sub-nationally representative |
| GDD 2017 | Global Student Based Student Health Survey 2012      | 2012 | 2012 | Iraq                      | Both urban and rural     | 2007 | 11 | 16  | Yes | Yes | FFQ                                      | Nationally representative     |
| GDD 2017 | Health Behavior in School-Aged Children 2002         | 2001 | 2002 | Ireland                   | Both urban and rural     | 2875 | 11 | 16  | Yes | Yes | FFQ                                      | Nationally representative     |
| GDD 2017 | Health Behavior in School-Aged Children 2006         | 2006 | 2006 | Ireland                   | Both urban and rural     | 4806 | 11 | 15  | Yes | Yes | FFQ                                      | Nationally representative     |
| GDD 2017 | Health Behavior in School-Aged Children 2010         | 2010 | 2010 | Ireland                   | Both urban and rural     | 4655 | 11 | 15  | Yes | Yes | FFQ                                      | Nationally representative     |
| GDD 2017 | Health Behavior in School-Aged Children 1998         | 1997 | 1998 | Ireland                   | Both urban and rural     | 4394 | 11 | 16  | Yes | Yes | FFQ                                      | Nationally representative     |
| GDD 2010 | Irish Community Health and Nutrition Survey          | 1987 | 1987 | Ireland                   | Information not reported | 1000 | 0  | 100 | Yes | Yes | Household availability/<br>budget survey | Nationally representative     |
| GDD 2010 | Irish Community Health and Nutrition Survey          | 1994 | 1994 | Ireland                   | Information not reported | 1000 | 0  | 100 | Yes | Yes | Household availability/<br>budget survey | Nationally representative     |
| GDD 2010 | North South Ireland Food Consumption Survey (NSIFCS) | 1997 | 1999 | Ireland                   | Information not reported | 1000 | 18 | 64  | Yes | Yes | Multiple 24-hour recall                  | Nationally representative     |
| GDD 2010 | SLN, 2007 & SLN 1997/1998                            | 2005 | 2006 | Ireland                   | Information not reported | 250  | 13 | 17  | Yes | Yes | Multiple 24-hour recall                  | Nationally representative     |
| GDD 2010 | SLN, 2007 & SLN 1997/1998                            | 1999 | 2007 | Ireland                   | Information not reported | 1000 | 18 | 64  | Yes | Yes | Multiple 24-hour recall                  | Nationally representative     |
| GDD 2010 | SLN, 2007 & SLN 1997/1998                            | 2007 | 2007 | Ireland                   | Information not reported | 1000 | 65 | 100 | Yes | Yes | Multiple 24-hour recall                  | Nationally representative     |
| GDD 2010 | Irish Community Health and Nutrition Survey          | 1999 | 1999 | Ireland                   | Information not reported | 1000 | 0  | 100 | Yes | Yes | Household availability/<br>budget survey | Nationally representative     |
| GDD 2010 | National Children's Food Survey, 2005                | 2003 | 2004 | Ireland                   | Information not reported | 250  | 5  | 9   | Yes | Yes | Multiple 24-hour recall                  | Nationally representative     |



|          |                                                                 |      |      |         |                          |       |    |     |     |     |                         |                               |
|----------|-----------------------------------------------------------------|------|------|---------|--------------------------|-------|----|-----|-----|-----|-------------------------|-------------------------------|
| GDD 2010 | The National Teen's food Survey, 2008                           | 2003 | 2004 | Ireland | Information not reported | 109   | 10 | 12  | Yes | Yes | Multiple 24-hour recall | Nationally representative     |
| GDD 2010 | Flynn et al.                                                    | 1987 | 1987 | Ireland | Information not reported | 46    | 20 | 60  | Yes | Yes | Biomarker               | Sub-nationally representative |
| GDD 2017 | Mabat First National Health and Nutrition Survey                | 1999 | 2001 | Israel  | Both urban and rural     | 3242  | 25 | 64  | Yes | Yes | Single 24-hour recall   | Nationally representative     |
| GDD 2017 | Mabat Youth National Health and Nutrition Survey                | 2003 | 2004 | Israel  | Both urban and rural     | 577   | 12 | 19  | Yes | Yes | Single 24-hour recall   | Nationally representative     |
| GDD 2017 | Mabat Elderly National Health and Nutrition Survey              | 2005 | 2006 | Israel  | Only urban               | 1786  | 63 | 96  | Yes | Yes | Single 24-hour recall   | Nationally representative     |
| GDD 2017 | Health Behavior in School-Aged Children 1994                    | 1993 | 1994 | Israel  | Both urban and rural     | 4299  | 11 | 16  | Yes | Yes | FFQ                     | Nationally representative     |
| GDD 2017 | Health Behavior in School-Aged Children 1998                    | 1998 | 1998 | Israel  | Both urban and rural     | 4746  | 11 | 17  | Yes | Yes | FFQ                     | Nationally representative     |
| GDD 2017 | Health Behavior in School-Aged Children 2002                    | 2001 | 2002 | Israel  | Both urban and rural     | 5341  | 11 | 17  | Yes | Yes | FFQ                     | Nationally representative     |
| GDD 2017 | Health Behavior in School-Aged Children 2006                    | 2006 | 2006 | Israel  | Both urban and rural     | 5249  | 11 | 15  | Yes | Yes | FFQ                     | Nationally representative     |
| GDD 2017 | Health Behavior in School-Aged Children 2010                    | 2010 | 2010 | Israel  | Both urban and rural     | 4098  | 11 | 15  | Yes | Yes | FFQ                     | Nationally representative     |
| GDD 2017 | Mediterranean healthy Eating, Aging and Lifestyles (MEAL) study | 2014 | 2016 | Italy   | Only urban               | 1957  | 15 | 100 | Yes | Yes | FFQ                     | Locally representative        |
| GDD 2017 | Moli-Sani Study                                                 | 2005 | 2010 | Italy   | Both urban and rural     | 23369 | 35 | 100 | Yes | Yes | FFQ                     | Sub-nationally representative |
| GDD 2017 | Health Behavior in School-Aged Children 2006                    | 2005 | 2006 | Italy   | Both urban and rural     | 3911  | 11 | 15  | Yes | Yes | FFQ                     | Nationally representative     |
| GDD 2017 | Health Behavior in School-Aged Children 2010                    | 2009 | 2010 | Italy   | Both urban and rural     | 4806  | 11 | 15  | Yes | Yes | FFQ                     | Nationally representative     |
| GDD 2017 | Health Behavior in School-Aged Children 2002                    | 2001 | 2002 | Italy   | Both urban and rural     | 4357  | 11 | 17  | Yes | Yes | FFQ                     | Nationally representative     |
| GDD 2010 | INN 1980-84                                                     | 1980 | 1984 | Italy   | Information not reported | 1000  | 1  | 80  | Yes | Yes | Multiple 24-hour recall | Nationally representative     |

|          |                                                                       |      |      |         |                          |      |    |     |     |     |                                          |                               |
|----------|-----------------------------------------------------------------------|------|------|---------|--------------------------|------|----|-----|-----|-----|------------------------------------------|-------------------------------|
| GDD 2010 | Italian Community Health and Nutrition Survey                         | 1990 | 1990 | Italy   | Information not reported | 1000 | 0  | 100 | Yes | Yes | Household availability/<br>budget survey | Nationally representative     |
| GDD 2010 | Italian Community Health and Nutrition Survey                         | 1993 | 1993 | Italy   | Information not reported | 1000 | 0  | 100 | Yes | Yes | Household availability/<br>budget survey | Nationally representative     |
| GDD 2010 | INN-CA 1994-96                                                        | 1994 | 1996 | Italy   | Information not reported | 1000 | 20 | 100 | Yes | Yes | Multiple 24-<br>hour recall              | Nationally representative     |
| GDD 2010 | INN-CA 1994-96                                                        | 1994 | 1996 | Italy   | Information not reported | 1000 | 4  | 100 | Yes | Yes | Multiple 24-<br>hour recall              | Nationally representative     |
| GDD 2010 | Italian Community Health and Nutrition Survey                         | 1996 | 1996 | Italy   | Information not reported | 1000 | 0  | 100 | Yes | Yes | Household availability/<br>budget survey | Nationally representative     |
| GDD 2010 | INRAN-SCAI 2005-06                                                    | 2005 | 2006 | Italy   | Information not reported | 1000 | 20 | 100 | Yes | Yes | Multiple 24-<br>hour recall              | Nationally representative     |
| GDD 2010 | TRANSFAIR study                                                       | 1980 | 1984 | Italy   | Information not reported | 1000 | 1  | 80  | Yes | Yes | Household availability/<br>budget survey | Nationally representative     |
| GDD 2010 | INTERSALT, Bassiano                                                   | 1985 | 1987 | Italy   | Information not reported | 25   | 20 | 59  | Yes | Yes | Biomarker                                | Sub-nationally representative |
| GDD 2010 | INTERSALT, Gubbio                                                     | 1985 | 1987 | Italy   | Information not reported | 25   | 20 | 59  | Yes | Yes | Biomarker                                | Sub-nationally representative |
| GDD 2010 | INTERSALT, Mirano                                                     | 1985 | 1987 | Italy   | Information not reported | 25   | 20 | 59  | Yes | Yes | Biomarker                                | Sub-nationally representative |
| GDD 2010 | INTERSALT, Naples                                                     | 1985 | 1987 | Italy   | Information not reported | 25   | 20 | 59  | Yes | Yes | Biomarker                                | Sub-nationally representative |
| GDD 2010 | Pavan et al. ( 1 of 4)                                                | 1994 | 1994 | Italy   | Information not reported | 370  | 22 | 89  | Yes | Yes | FFQ                                      | Sub-nationally representative |
| GDD 2010 | Venezia et al.                                                        | 2002 | 2004 | Italy   | Information not reported | 940  | 25 | 75  | Yes | No  | Biomarker                                | Sub-nationally representative |
| GDD 2017 | Nutrition in African Population                                       | 1993 | 1996 | Jamaica | Only rural               | 846  | 24 | 74  | Yes | Yes | FFQ                                      | Nationally representative     |
| GDD 2017 | Global Student Based Student Health Survey 2010                       | 2010 | 2010 | Jamaica | Both urban and rural     | 1586 | 11 | 16  | Yes | Yes | FFQ                                      | Nationally representative     |
| GDD 2010 | Social and dietary determinants of body mass index of adult Jamaicans | 1993 | 1995 | Jamaica | Information not reported | 500  | 25 | 74  | Yes | Yes | FFQ                                      | Nationally representative     |
| GDD 2010 | Cooper et al.                                                         | 1994 | 1995 | Jamaica | Information not reported | 1357 | 25 | 74  | Yes | Yes | Biomarker                                | Sub-nationally representative |

|          |                                                                           |      |      |       |                      |       |    |     |     |     |                       |                               |
|----------|---------------------------------------------------------------------------|------|------|-------|----------------------|-------|----|-----|-----|-----|-----------------------|-------------------------------|
| GDD 2017 | Japan Public Health Center-based prospective Study (JPHC) Cohort I        | 1990 | 1995 | Japan | Both urban and rural | 42115 | 45 | 65  | Yes | Yes | FFQ                   | Locally representative        |
| GDD 2017 | Japan Public Health Center-based prospective Study (JPHC) Cohort I        | 1990 | 1995 | Japan | Both urban and rural | 41536 | 45 | 75  | Yes | Yes | FFQ                   | Locally representative        |
| GDD 2017 | Japan Public Health Center-based prospective Study (JPHC Study) Cohort II | 1993 | 2000 | Japan | Both urban and rural | 55720 | 45 | 75  | Yes | Yes | FFQ                   | Sub-nationally representative |
| GDD 2017 | Japan Public Health Center-based prospective Study (JPHC) Cohort II       | 1993 | 2000 | Japan | Both urban and rural | 50766 | 45 | 85  | Yes | Yes | FFQ                   | Sub-nationally representative |
| GDD 2017 | National Health and Nutrition Survey                                      | 1995 | 1995 | Japan | Both urban and rural | 14240 | 1  | 100 | Yes | Yes | Single 24-hour recall | Nationally representative     |
| GDD 2017 | National Health and Nutrition Survey                                      | 1996 | 1996 | Japan | Both urban and rural | 14019 | 1  | 100 | Yes | Yes | Single 24-hour recall | Nationally representative     |
| GDD 2017 | National Health and Nutrition Survey                                      | 1997 | 1997 | Japan | Both urban and rural | 13289 | 1  | 100 | Yes | Yes | Single 24-hour recall | Nationally representative     |
| GDD 2017 | National Health and Nutrition Survey                                      | 1998 | 1998 | Japan | Both urban and rural | 14158 | 1  | 100 | Yes | Yes | Single 24-hour recall | Nationally representative     |
| GDD 2017 | National Health and Nutrition Survey                                      | 1999 | 1999 | Japan | Both urban and rural | 12590 | 1  | 100 | Yes | Yes | Single 24-hour recall | Nationally representative     |
| GDD 2017 | National Health and Nutrition Survey                                      | 2000 | 2000 | Japan | Both urban and rural | 12271 | 1  | 100 | Yes | Yes | Single 24-hour recall | Nationally representative     |
| GDD 2017 | National Health and Nutrition Survey                                      | 2001 | 2001 | Japan | Both urban and rural | 12481 | 1  | 100 | Yes | Yes | Single 24-hour recall | Nationally representative     |
| GDD 2017 | National Health and Nutrition Survey                                      | 2002 | 2002 | Japan | Both urban and rural | 11491 | 1  | 100 | Yes | Yes | Single 24-hour recall | Nationally representative     |
| GDD 2017 | National Health and Nutrition Survey                                      | 2003 | 2003 | Japan | Both urban and rural | 11104 | 1  | 100 | Yes | Yes | Single 24-hour recall | Nationally representative     |
| GDD 2017 | National Health and Nutrition Survey                                      | 2004 | 2004 | Japan | Both urban and rural | 8762  | 1  | 100 | Yes | Yes | Single 24-hour recall | Nationally representative     |
| GDD 2017 | National Health and Nutrition Survey                                      | 2005 | 2005 | Japan | Both urban and rural | 4891  | 1  | 100 | Yes | Yes | Single 24-hour recall | Nationally representative     |
| GDD 2017 | National Health and Nutrition Survey                                      | 2006 | 2006 | Japan | Both urban and rural | 9423  | 1  | 100 | Yes | Yes | Single 24-hour recall | Nationally representative     |
| GDD 2017 | National Health and Nutrition Survey                                      | 2007 | 2007 | Japan | Both urban and rural | 8885  | 1  | 100 | Yes | Yes | Single 24-hour recall | Nationally representative     |
| GDD 2017 | National Health and Nutrition Survey                                      | 2008 | 2008 | Japan | Both urban and rural | 9127  | 1  | 100 | Yes | Yes | Single 24-hour recall | Nationally representative     |
| GDD 2017 | National Health and Nutrition Survey                                      | 2009 | 2009 | Japan | Both urban and rural | 9004  | 1  | 100 | Yes | Yes | Single 24-hour recall | Nationally representative     |
| GDD 2017 | National Health and Nutrition Survey                                      | 2010 | 2010 | Japan | Both urban and rural | 9566  | 1  | 100 | Yes | Yes | Single 24-hour recall | Nationally representative     |

|          |                                                                     |      |      |       |                          |       |    |     |     |     |                       |                               |
|----------|---------------------------------------------------------------------|------|------|-------|--------------------------|-------|----|-----|-----|-----|-----------------------|-------------------------------|
| GDD 2017 | National Health and Nutrition Survey                                | 2011 | 2011 | Japan | Both urban and rural     | 14466 | 1  | 100 | Yes | Yes | Single 24-hour recall | Nationally representative     |
| GDD 2017 | National Health and Nutrition Survey                                | 2012 | 2012 | Japan | Both urban and rural     | 32227 | 1  | 100 | Yes | Yes | Single 24-hour recall | Nationally representative     |
| GDD 2017 | National Health and Nutrition Survey                                | 2013 | 2013 | Japan | Both urban and rural     | 13858 | 1  | 100 | Yes | Yes | Single 24-hour recall | Nationally representative     |
| GDD 2017 | National Health and Nutrition Survey                                | 2014 | 2014 | Japan | Both urban and rural     | 14348 | 1  | 100 | Yes | Yes | Single 24-hour recall | Nationally representative     |
| GDD 2017 | National Health and Nutrition Survey                                | 2015 | 2015 | Japan | Both urban and rural     | 13424 | 1  | 100 | Yes | Yes | Single 24-hour recall | Nationally representative     |
| GDD 2010 | The Japan Public Health Center-based Prospective Study (JPHC Study) | 1995 | 1998 | Japan | Information not reported | 18943 | 45 | 74  | Yes | Yes | FFQ                   | Locally representative        |
| GDD 2010 | National Nutrition Survey (in Japan)                                | 1995 | 1995 | Japan | Information not reported | 1000  | 20 | 100 | Yes | Yes | Single 24-hour recall | Nationally representative     |
| GDD 2010 | National Nutrition Survey (in Japan)                                | 1998 | 1998 | Japan | Information not reported | 1000  | 20 | 100 | Yes | Yes | Single 24-hour recall | Nationally representative     |
| GDD 2010 | The Japan Public Health Center-based Prospective Study (JPHC Study) | 2000 | 2003 | Japan | Information not reported | 10704 | 50 | 79  | Yes | Yes | FFQ                   | Locally representative        |
| GDD 2010 | INTERSALT, Osaka                                                    | 1985 | 1987 | Japan | Information not reported | 25    | 20 | 59  | Yes | Yes | Biomarker             | Sub-nationally representative |
| GDD 2010 | INTERSALT, Tochigi                                                  | 1985 | 1987 | Japan | Information not reported | 25    | 20 | 59  | Yes | Yes | Biomarker             | Sub-nationally representative |
| GDD 2010 | INTERSALT, Toyama                                                   | 1985 | 1987 | Japan | Information not reported | 25    | 20 | 59  | Yes | Yes | Biomarker             | Sub-nationally representative |
| GDD 2010 | Kawamura et al.                                                     | 1993 | 1994 | Japan | Information not reported | 90    | 30 | 65  | Yes | Yes | Biomarker             | Sub-nationally representative |
| GDD 2010 | Liu et al.                                                          | 1984 | 1999 | Japan | Information not reported | 484   | 48 | 56  | Yes | Yes | Biomarker             | Nationally representative     |
| GDD 2010 | INTERMAP, Toyama                                                    | 1997 | 1998 | Japan | Information not reported | 72    | 40 | 59  | Yes | Yes | Biomarker             | Sub-nationally representative |
| GDD 2010 | INTERMAP, Sapporo                                                   | 1997 | 1998 | Japan | Information not reported | 75    | 40 | 59  | Yes | Yes | Biomarker             | Sub-nationally representative |
| GDD 2010 | INTERMAP, Aito Town                                                 | 1997 | 1998 | Japan | Information not reported | 68    | 40 | 59  | Yes | Yes | Biomarker             | Sub-nationally representative |
| GDD 2010 | INTERMAP, Wakayama                                                  | 1997 | 1998 | Japan | Information not reported | 73    | 40 | 59  | Yes | Yes | Biomarker             | Sub-nationally representative |
| GDD 2010 | INTERMAP, Toyama                                                    | 1997 | 1998 | Japan | Information not reported | 72    | 40 | 59  | Yes | Yes | Single 24-hour recall | Sub-nationally representative |
| GDD 2010 | INTERMAP, Sapporo                                                   | 1997 | 1998 | Japan | Information not reported | 75    | 40 | 59  | Yes | Yes | Single 24-hour recall | Sub-nationally representative |
| GDD 2010 | INTERMAP, Aito Town                                                 | 1997 | 1998 | Japan | Information not reported | 68    | 40 | 59  | Yes | Yes | Single 24-hour recall | Sub-nationally representative |

|          |                                                            |      |      |            |                                 |       |    |     |     |     |                              |                                      |
|----------|------------------------------------------------------------|------|------|------------|---------------------------------|-------|----|-----|-----|-----|------------------------------|--------------------------------------|
| GDD 2010 | INTERMAP, Wakayama                                         | 1997 | 1998 | Japan      | <i>Information not reported</i> | 73    | 40 | 59  | Yes | Yes | <i>Single 24-hour recall</i> | <i>Sub-nationally representative</i> |
| GDD 2010 | Sasaki et al.                                              | 1996 | 1996 | Japan      | <i>Information not reported</i> | 154   | 20 | 25  | Yes | Yes | <i>Biomarker</i>             | <i>Sub-nationally representative</i> |
| GDD 2010 | Sasaki et al.                                              | 1996 | 1996 | Japan      | <i>Information not reported</i> | 154   | 20 | 25  | Yes | Yes | <i>Single 24-hour recall</i> | <i>Sub-nationally representative</i> |
| GDD 2010 | Kimira et al.                                              | 1997 | 2002 | Japan      | <i>Information not reported</i> | 219   | 27 | 84  | Yes | Yes | <i>Biomarker</i>             | <i>Sub-nationally representative</i> |
| GDD 2010 | Kimira et al.                                              | 1997 | 2002 | Japan      | <i>Information not reported</i> | 219   | 27 | 84  | Yes | Yes | <i>Single 24-hour recall</i> | <i>Sub-nationally representative</i> |
| GDD 2017 | Case Control Study                                         | 2010 | 2012 | Jordan     | <i>Both urban and rural</i>     | 294   | 22 | 80  | Yes | Yes | <i>FFQ</i>                   | <i>Locally representative</i>        |
| GDD 2017 | Obesity and Macro/micronutrients                           | 2014 | 2015 | Jordan     | <i>Only urban</i>               | 153   | 18 | 53  | Yes | Yes | <i>FFQ</i>                   | <i>Locally representative</i>        |
| GDD 2017 | Global Student Based Student Health Survey 2004            | 2004 | 2004 | Jordan     | <i>Both urban and rural</i>     | 2409  | 11 | 16  | Yes | Yes | <i>FFQ</i>                   | <i>Nationally representative</i>     |
| GDD 2017 | Global Student Based Student Health Survey 2007            | 2007 | 2007 | Jordan     | <i>Both urban and rural</i>     | 2173  | 11 | 16  | Yes | Yes | <i>FFQ</i>                   | <i>Nationally representative</i>     |
| GDD 2017 | Global Student Based Student Health Survey 2010            | 2010 | 2010 | Jordan     | <i>Both urban and rural</i>     | 1480  | 11 | 16  | Yes | Yes | <i>FFQ</i>                   | <i>Nationally representative</i>     |
| GDD 2017 | Demographic and Health Survey Jordan 2002                  | 2002 | 2002 | Jordan     | <i>Both urban and rural</i>     | 6741  | 0  | 49  | Yes | Yes | <i>DHS questionnaire</i>     | <i>Nationally representative</i>     |
| GDD 2017 | Demographic and Health Survey Jordan 2007                  | 2007 | 2007 | Jordan     | <i>Both urban and rural</i>     | 16991 | 0  | 49  | Yes | Yes | <i>DHS questionnaire</i>     | <i>Nationally representative</i>     |
| GDD 2017 | Demographic and Health Survey Jordan 2012                  | 2012 | 2012 | Jordan     | <i>Both urban and rural</i>     | 26984 | 0  | 96  | Yes | Yes | <i>DHS questionnaire</i>     | <i>Nationally representative</i>     |
| GDD 2017 | Demographic and Health Survey Jordan 2009                  | 2009 | 2009 | Jordan     | <i>Both urban and rural</i>     | 15791 | 0  | 95  | Yes | Yes | <i>DHS questionnaire</i>     | <i>Nationally representative</i>     |
| GDD 2010 | Jordan Behavioral risk factor Surveillance System (JBRFSS) | 2007 | 2007 | Jordan     | <i>Information not reported</i> | 1000  | 20 | 100 | Yes | Yes | <i>FFQ</i>                   | <i>Nationally representative</i>     |
| GDD 2017 | Demographic and Health Survey Kazakhstan 1995              | 1995 | 1995 | Kazakhstan | <i>Both urban and rural</i>     | 4444  | 0  | 49  | Yes | Yes | <i>DHS questionnaire</i>     | <i>Nationally representative</i>     |
| GDD 2017 | World Health Survey 2003                                   | 2003 | 2003 | Kazakhstan | <i>Both urban and rural</i>     | 4117  | 18 | 89  | Yes | Yes | <i>FFQ</i>                   | <i>Nationally representative</i>     |

|          |                                                                                                               |      |      |            |                          |       |    |     |     |     |                       |                           |
|----------|---------------------------------------------------------------------------------------------------------------|------|------|------------|--------------------------|-------|----|-----|-----|-----|-----------------------|---------------------------|
| GDD 2017 | Demographic and Health Survey Kazakhstan 1999                                                                 | 1999 | 1999 | Kazakhstan | Both urban and rural     | 4003  | 0  | 59  | Yes | Yes | DHS questionnaire     | Nationally representative |
| GDD 2010 | Living Conditions Lifestyles and Health                                                                       | 2001 | 2002 | Kazakhstan | Information not reported | 1000  | 18 | 99  | Yes | Yes | FFQ                   | Nationally representative |
| GDD 2017 | Nutrition status and associated factors among children in public primary schools in Dagoretti, Nairobi, Kenya | 2009 | 2010 | Kenya      | Only urban               | 416   | 4  | 11  | Yes | Yes | Single 24-hour recall | Locally representative    |
| GDD 2017 | Global Student Based Student Health Survey 2003                                                               | 2003 | 2003 | Kenya      | Both urban and rural     | 3573  | 11 | 16  | Yes | Yes | FFQ                   | Nationally representative |
| GDD 2017 | World Health Survey 2003                                                                                      | 2003 | 2003 | Kenya      | Both urban and rural     | 4002  | 18 | 100 | Yes | Yes | FFQ                   | Nationally representative |
| GDD 2017 | Demographic and Health Survey Kenya 2003                                                                      | 2003 | 2003 | Kenya      | Both urban and rural     | 4439  | 0  | 4   | Yes | Yes | DHS questionnaire     | Nationally representative |
| GDD 2017 | Demographic and Health Survey Kenya 2008                                                                      | 2008 | 2009 | Kenya      | Both urban and rural     | 4676  | 0  | 4   | Yes | Yes | DHS questionnaire     | Nationally representative |
| GDD 2017 | Demographic and Health Survey Kenya 2014                                                                      | 2014 | 2014 | Kenya      | Both urban and rural     | 5766  | 0  | 4   | Yes | Yes | DHS questionnaire     | Nationally representative |
| GDD 2010 | INTERSALT, Rambuğu and Ndori villages                                                                         | 1985 | 1987 | Kenya      | Information not reported | 23    | 20 | 59  | Yes | Yes | Biomarker             | Locally representative    |
| GDD 2017 | Global Student Based Student Health Survey 2011                                                               | 2011 | 2011 | Kiribati   | Both urban and rural     | 1559  | 11 | 16  | Yes | Yes | FFQ                   | Nationally representative |
| GDD 2010 | Kiribati NCD Risk Factors STEPS Report                                                                        | 2004 | 2004 | Kiribati   | Information not reported | 1000  | 15 | 64  | Yes | Yes | FFQ                   | Nationally representative |
| GDD 2017 | Korea National Health and Nutrition Examination Survey                                                        | 1998 | 1998 | Korea      | Both urban and rural     | 11321 | 1  | 98  | Yes | Yes | FFQ                   | Nationally representative |
| GDD 2017 | Korea National Health and Nutrition Examination Survey                                                        | 2001 | 2001 | Korea      | Both urban and rural     | 10075 | 1  | 99  | Yes | Yes | FFQ                   | Nationally representative |
| GDD 2017 | Korea National Health and Nutrition Examination Survey                                                        | 2005 | 2005 | Korea      | Both urban and rural     | 8983  | 1  | 103 | Yes | Yes | FFQ                   | Nationally representative |
| GDD 2017 | Korea National Health and Nutrition Examination Survey                                                        | 2007 | 2007 | Korea      | Both urban and rural     | 4096  | 1  | 103 | Yes | Yes | FFQ                   | Nationally representative |

|          |                                                        |      |      |            |                          |       |    |     |     |     |                       |                               |
|----------|--------------------------------------------------------|------|------|------------|--------------------------|-------|----|-----|-----|-----|-----------------------|-------------------------------|
| GDD 2017 | Korea National Health and Nutrition Examination Survey | 2008 | 2008 | Korea      | Both urban and rural     | 8632  | 1  | 93  | Yes | Yes | FFQ                   | Nationally representative     |
| GDD 2017 | Korea National Health and Nutrition Examination Survey | 2009 | 2009 | Korea      | Both urban and rural     | 9393  | 1  | 95  | Yes | Yes | FFQ                   | Nationally representative     |
| GDD 2017 | Korea National Health and Nutrition Examination Survey | 2010 | 2010 | Korea      | Both urban and rural     | 8022  | 1  | 98  | Yes | Yes | FFQ                   | Nationally representative     |
| GDD 2017 | Korea National Health and Nutrition Examination Survey | 2011 | 2011 | Korea      | Both urban and rural     | 7706  | 1  | 97  | Yes | Yes | FFQ                   | Nationally representative     |
| GDD 2017 | Korea National Health and Nutrition Examination Survey | 2012 | 2012 | Korea      | Both urban and rural     | 7209  | 1  | 98  | Yes | Yes | FFQ                   | Nationally representative     |
| GDD 2017 | Korea National Health and Nutrition Examination Survey | 2013 | 2013 | Korea      | Both urban and rural     | 7244  | 1  | 96  | Yes | Yes | FFQ                   | Nationally representative     |
| GDD 2017 | Korea National Health and Nutrition Examination Survey | 2014 | 2014 | Korea      | Both urban and rural     | 6802  | 1  | 101 | Yes | Yes | FFQ                   | Nationally representative     |
| GDD 2010 | World-wide consumption of trans fatty acids            |      |      | Korea      | Information not reported |       | 0  | 100 | Yes | Yes | Single 24-hour recall | Nationally representative     |
| GDD 2010 | INTERSALT, Pusan                                       | 1985 | 1987 | Korea      | Information not reported | 25    | 20 | 59  | Yes | Yes | Biomarker             | Sub-nationally representative |
| GDD 2017 | Case-Control study of thyroid cancer in Kuwait         | 2001 | 2005 | Kuwait     | Only urban               | 313   | 12 | 73  | Yes | Yes | FFQ                   | Nationally representative     |
| GDD 2017 | Global Student Based Student Health Survey 2011        | 2011 | 2011 | Kuwait     | Both urban and rural     | 2648  | 11 | 16  | Yes | Yes | FFQ                   | Nationally representative     |
| GDD 2010 | Kuwait STEPS 2006                                      | 2006 | 2006 | Kuwait     | Information not reported | 1000  | 20 | 64  | Yes | Yes | FFQ                   | Nationally representative     |
| GDD 2010 | National Nutrition Survey for the State of Kuwait      | 2008 | 2009 | Kuwait     | Information not reported | 1000  | 3  | 100 | Yes | Yes | Single 24-hour recall | Nationally representative     |
| GDD 2017 | Demographic and Health Survey Kyrgyzstan 1997          | 1997 | 1997 | Kyrgyzstan | Both urban and rural     | 4792  | 0  | 49  | Yes | Yes | DHS questionnaire     | Nationally representative     |
| GDD 2017 | Demographic and Health Survey Kyrgyzstan 2012          | 2012 | 2012 | Kyrgyzstan | Both urban and rural     | 12222 | 0  | 49  | Yes | Yes | DHS questionnaire     | Nationally representative     |

|          |                                                              |      |      |                                  |                                 |      |    |     |     |     |                                             |                                      |
|----------|--------------------------------------------------------------|------|------|----------------------------------|---------------------------------|------|----|-----|-----|-----|---------------------------------------------|--------------------------------------|
| GDD 2010 | Living Conditions Lifestyles and Health                      | 2001 | 2002 | Kyrgyzstan                       | <i>Information not reported</i> | 1000 | 18 | 99  | Yes | Yes | FFQ                                         | <i>Nationally representative</i>     |
| GDD 2017 | World Health Survey 2003                                     | 2003 | 2003 | Lao People's Democratic Republic | <i>Both urban and rural</i>     | 3367 | 17 | 95  | Yes | Yes | FFQ                                         | <i>Nationally representative</i>     |
| GDD 2010 | STEP LAO                                                     | 2008 | 2008 | Lao People's Democratic Republic | <i>Information not reported</i> | 1000 | 25 | 64  | Yes | Yes | FFQ                                         | <i>Sub-nationally representative</i> |
| GDD 2017 | World Health Survey 2003                                     | 2003 | 2003 | Latvia                           | <i>Both urban and rural</i>     | 789  | 18 | 89  | Yes | Yes | FFQ                                         | <i>Nationally representative</i>     |
| GDD 2017 | Health Behavior in School-Aged Children 1994                 | 1993 | 1994 | Latvia                           | <i>Both urban and rural</i>     | 3749 | 11 | 17  | Yes | Yes | FFQ                                         | <i>Nationally representative</i>     |
| GDD 2017 | Health Behavior in School-Aged Children 1998                 | 1998 | 1998 | Latvia                           | <i>Both urban and rural</i>     | 3675 | 11 | 17  | Yes | Yes | FFQ                                         | <i>Nationally representative</i>     |
| GDD 2017 | Health Behavior in School-Aged Children 2002                 | 2001 | 2002 | Latvia                           | <i>Both urban and rural</i>     | 3455 | 11 | 16  | Yes | Yes | FFQ                                         | <i>Nationally representative</i>     |
| GDD 2017 | Health Behavior in School-Aged Children 2006                 | 2006 | 2006 | Latvia                           | <i>Both urban and rural</i>     | 4205 | 11 | 15  | Yes | Yes | FFQ                                         | <i>Nationally representative</i>     |
| GDD 2017 | Health Behavior in School-Aged Children 2010                 | 2010 | 2010 | Latvia                           | <i>Both urban and rural</i>     | 4238 | 11 | 15  | Yes | Yes | FFQ                                         | <i>Nationally representative</i>     |
| GDD 2010 | Nutrition and Lifestyle in the Baltic Republics              | 1997 | 1997 | Latvia                           | <i>Information not reported</i> | 1000 | 19 | 64  | Yes | Yes | <i>Single 24-hour recall</i>                | <i>Nationally representative</i>     |
| GDD 2010 | Latvian Community Health and Nutrition Survey                | 2002 | 2002 | Latvia                           | <i>Information not reported</i> | 1000 | 0  | 100 | Yes | Yes | <i>Household availability/budget survey</i> | <i>Nationally representative</i>     |
| GDD 2010 | Latvian Community Health and Nutrition Survey                | 2003 | 2003 | Latvia                           | <i>Information not reported</i> | 1000 | 0  | 100 | Yes | Yes | <i>Household availability/budget survey</i> | <i>Nationally representative</i>     |
| GDD 2010 | Latvian Community Health and Nutrition Survey                | 2004 | 2004 | Latvia                           | <i>Information not reported</i> | 1000 | 0  | 100 | Yes | Yes | <i>Household availability/budget survey</i> | <i>Nationally representative</i>     |
| GDD 2017 | Socioeconomic and dietary determinants of obesity in Lebanon | 2008 | 2009 | Lebanon                          | <i>Both urban and rural</i>     | 3037 | 7  | 90  | Yes | Yes | FFQ                                         | <i>Nationally representative</i>     |



|          |                                                             |      |      |                        |                          |      |    |    |     |     |                   |                           |
|----------|-------------------------------------------------------------|------|------|------------------------|--------------------------|------|----|----|-----|-----|-------------------|---------------------------|
| GDD 2017 | Global Student Based Student Health Survey 2005             | 2005 | 2005 | Lebanon                | Both urban and rural     | 5083 | 11 | 16 | Yes | Yes | FFQ               | Nationally representative |
| GDD 2017 | Global Student Based Student Health Survey 2011             | 2011 | 2011 | Lebanon                | Both urban and rural     | 2272 | 11 | 16 | Yes | Yes | FFQ               | Nationally representative |
| GDD 2017 | Demographic and Health Survey Lesotho 2004                  | 2004 | 2005 | Lesotho                | Both urban and rural     | 5772 | 0  | 49 | Yes | Yes | DHS questionnaire | Nationally representative |
| GDD 2017 | Demographic and Health Survey Lesotho 2009                  | 2009 | 2010 | Lesotho                | Both urban and rural     | 3347 | 0  | 47 | Yes | Yes | DHS questionnaire | Nationally representative |
| GDD 2017 | Demographic and Health Survey Lesotho 2014                  | 2014 | 2014 | Lesotho                | Both urban and rural     | 5509 | 0  | 49 | Yes | Yes | DHS questionnaire | Nationally representative |
| GDD 2017 | Demographic and Health Survey Liberia 2011                  | 2011 | 2011 | Liberia                | Both urban and rural     | 2449 | 0  | 4  | Yes | Yes | Biomarker         | Nationally representative |
| GDD 2017 | Demographic and Health Survey Liberia 2007                  | 2006 | 2007 | Liberia                | Both urban and rural     | 6897 | 0  | 49 | Yes | Yes | DHS questionnaire | Nationally representative |
| GDD 2017 | Demographic and Health Survey Liberia 2009                  | 2008 | 2009 | Liberia                | Both urban and rural     | 3046 | 0  | 4  | Yes | Yes | Biomarker         | Nationally representative |
| GDD 2017 | Demographic and Health Survey Liberia 1986                  | 1986 | 1986 | Liberia                | Both urban and rural     | 1628 | 0  | 4  | Yes | Yes | DHS questionnaire | Nationally representative |
| GDD 2017 | Global Student Based Student Health Survey 2007             | 2007 | 2007 | Libyan Arab Jamahiriya | Both urban and rural     | 2183 | 11 | 16 | Yes | Yes | FFQ               | Nationally representative |
| GDD 2010 | Libya Global School-based Student Health Survey (GSHS)-2007 | 2009 | 2009 | Libyan Arab Jamahiriya | Information not reported | 1000 | 25 | 64 | Yes | Yes | FFQ               | Nationally representative |
| GDD 2017 | Health Behavior in School-Aged Children 2010                | 2010 | 2010 | Lithuania              | Both urban and rural     | 5300 | 11 | 15 | Yes | Yes | FFQ               | Nationally representative |
| GDD 2017 | Health Behavior in School-Aged Children 1994                | 1993 | 1994 | Lithuania              | Both urban and rural     | 5428 | 10 | 16 | Yes | Yes | FFQ               | Nationally representative |
| GDD 2017 | Health Behavior in School-Aged Children 1998                | 1998 | 1998 | Lithuania              | Both urban and rural     | 4513 | 11 | 16 | Yes | Yes | FFQ               | Nationally representative |

|          |                                                                                                                                 |      |      |            |                          |      |    |     |     |     |                                       |                           |
|----------|---------------------------------------------------------------------------------------------------------------------------------|------|------|------------|--------------------------|------|----|-----|-----|-----|---------------------------------------|---------------------------|
| GDD 2017 | Health Behavior in School-Aged Children 2002                                                                                    | 2001 | 2002 | Lithuania  | Both urban and rural     | 5644 | 11 | 17  | Yes | Yes | FFQ                                   | Nationally representative |
| GDD 2017 | Health Behavior in School-Aged Children 2006                                                                                    | 2006 | 2006 | Lithuania  | Both urban and rural     | 5601 | 11 | 15  | Yes | Yes | FFQ                                   | Nationally representative |
| GDD 2010 | Nutrition and Lifestlye in the Baltic Republics                                                                                 | 1997 | 1997 | Lithuania  | Information not reported | 1000 | 20 | 65  | Yes | Yes | Single 24-hour recall                 | Nationally representative |
| GDD 2010 | No survey name available, unpubl. Data, data provided by the Institute od Biochemical Research of Kaunas University of Medicine | 2007 | 2007 | Lithuania  | Information not reported | 1000 | 19 | 64  | Yes | Yes | Single 24-hour recall                 | Nationally representative |
| GDD 2017 | Health Behavior in School-Aged Children 2006                                                                                    | 2006 | 2006 | Luxembourg | Both urban and rural     | 4265 | 11 | 15  | Yes | Yes | FFQ                                   | Nationally representative |
| GDD 2017 | Health Behavior in School-Aged Children 2010                                                                                    | 2010 | 2010 | Luxembourg | Both urban and rural     | 4045 | 11 | 15  | Yes | Yes | FFQ                                   | Nationally representative |
| GDD 2010 | Luxembourgian Community Health and Nutrition Survey                                                                             | 1993 | 1993 | Luxembourg | Information not reported | 1000 | 0  | 100 | Yes | Yes | Household availability/ budget survey | Nationally representative |
| GDD 2017 | Global Student Based Student Health Survey 2007                                                                                 | 2007 | 2007 | Macedonia  | Both urban and rural     | 2077 | 7  | 16  | Yes | Yes | FFQ                                   | Nationally representative |
| GDD 2017 | Health Behavior in School-Aged Children 2002                                                                                    | 2001 | 2002 | Macedonia  | Both urban and rural     | 4030 | 11 | 16  | Yes | Yes | FFQ                                   | Nationally representative |
| GDD 2017 | Health Behavior in School-Aged Children 2006                                                                                    | 2006 | 2006 | Macedonia  | Both urban and rural     | 5255 | 11 | 15  | Yes | Yes | FFQ                                   | Nationally representative |
| GDD 2017 | Health Behavior in School-Aged Children 2010                                                                                    | 2009 | 2010 | Macedonia  | Both urban and rural     | 3805 | 11 | 15  | Yes | Yes | FFQ                                   | Nationally representative |
| GDD 2017 | Demographic and Health Survey Madagascar 1997                                                                                   | 1997 | 1997 | Madagascar | Both urban and rural     | 2864 | 0  | 2   | Yes | Yes | DHS questionnaire                     | Nationally representative |
| GDD 2017 | Demographic and Health Survey Madagascar 2011                                                                                   | 2011 | 2011 | Madagascar | Both urban and rural     | 5257 | 0  | 4   | Yes | Yes | Biomarker                             | Nationally representative |

|          |                                                                               |      |      |            |                          |       |    |    |     |     |                   |                               |
|----------|-------------------------------------------------------------------------------|------|------|------------|--------------------------|-------|----|----|-----|-----|-------------------|-------------------------------|
| GDD 2017 | Demographic and Health Survey Madagascar 2013                                 | 2013 | 2013 | Madagascar | Both urban and rural     | 4539  | 0  | 4  | Yes | Yes | Biomarker         | Nationally representative     |
| GDD 2017 | Demographic and Health Survey Madagascar 2003                                 | 2003 | 2004 | Madagascar | Both urban and rural     | 6922  | 0  | 49 | Yes | Yes | DHS questionnaire | Nationally representative     |
| GDD 2017 | Demographic and Health Survey Madagascar 2008                                 | 2008 | 2009 | Madagascar | Both urban and rural     | 28452 | 0  | 59 | Yes | Yes | DHS questionnaire | Nationally representative     |
| GDD 2017 | Demographic and Health Survey Madagascar 2016                                 | 2016 | 2016 | Madagascar | Both urban and rural     | 5925  | 0  | 4  | Yes | Yes | DHS questionnaire | Nationally representative     |
| GDD 2010 | Enquête sur les facteurs de risque des maladies non transmissibles Madagascar | 2005 | 2005 | Madagascar | Information not reported | 1000  | 25 | 64 | Yes | Yes | FFQ               | Sub-nationally representative |
| GDD 2017 | Global Student Based Student Health Survey 2009                               | 2009 | 2009 | Malawi     | Both urban and rural     | 2243  | 11 | 16 | Yes | Yes | FFQ               | Nationally representative     |
| GDD 2017 | World Health Survey 2003                                                      | 2003 | 2003 | Malawi     | Both urban and rural     | 4905  | 18 | 96 | Yes | Yes | FFQ               | Nationally representative     |
| GDD 2017 | Demographic and Health Survey Malawi 2012                                     | 2012 | 2012 | Malawi     | Both urban and rural     | 1900  | 0  | 4  | Yes | Yes | Biomarker         | Nationally representative     |
| GDD 2017 | Demographic and Health Survey Malawi 2004                                     | 2004 | 2005 | Malawi     | Both urban and rural     | 11531 | 0  | 49 | Yes | Yes | DHS questionnaire | Nationally representative     |
| GDD 2017 | Demographic and Health Survey Malawi 2010                                     | 2010 | 2010 | Malawi     | Both urban and rural     | 22343 | 0  | 49 | Yes | Yes | DHS questionnaire | Nationally representative     |
| GDD 2017 | Demographic and Health Survey Malawi 2014                                     | 2014 | 2014 | Malawi     | Both urban and rural     | 1752  | 0  | 4  | Yes | Yes | Biomarker         | Nationally representative     |
| GDD 2017 | Demographic and Health Survey Malawi 2000                                     | 2000 | 2000 | Malawi     | Both urban and rural     | 8904  | 0  | 4  | Yes | Yes | DHS questionnaire | Nationally representative     |
| GDD 2017 | Demographic and Health Survey Malawi 2015                                     | 2015 | 2016 | Malawi     | Both urban and rural     | 19341 | 0  | 49 | Yes | Yes | DHS questionnaire | Nationally representative     |
| GDD 2010 | Simmons et al. (1 of 2)                                                       | 1983 | 1983 | Malawi     | Information not reported | 78    | 20 | 79 | Yes | Yes | Biomarker         | Locally representative        |
| GDD 2010 | Simmons et al. (2 of 2)                                                       | 1983 | 1983 | Malawi     | Information not reported | 123   | 20 | 79 | Yes | Yes | Biomarker         | Locally representative        |

|          |                                                                                                                                                        |      |      |          |                          |       |    |    |     |     |                         |                               |
|----------|--------------------------------------------------------------------------------------------------------------------------------------------------------|------|------|----------|--------------------------|-------|----|----|-----|-----|-------------------------|-------------------------------|
| GDD 2017 | Malaysia Lipid Study                                                                                                                                   | 2012 | 2013 | Malaysia | Only urban               | 577   | 20 | 67 | Yes | Yes | Multiple 24-hour recall | Locally representative        |
| GDD 2017 | SEANUTS: South East Asian Nutrition Surveys                                                                                                            | 2010 | 2011 | Malaysia | Both urban and rural     | 3542  | 0  | 12 | Yes | Yes | FFQ                     | Nationally representative     |
| GDD 2017 | Seremban Cohort Study (SeCoSt)                                                                                                                         | 2012 | 2017 | Malaysia | Only urban               | 294   | 18 | 43 | No  | Yes | Multiple 24-hour recall | Locally representative        |
| GDD 2017 | The Universiti Sains Malaysia Pregnancy Cohort Study                                                                                                   | 2010 | 2015 | Malaysia | Only rural               | 153   | 19 | 41 | No  | Yes | FFQ                     | Locally representative        |
| GDD 2017 | Clustering of lifestyle risk factors and understanding its association with stress on health and wellbeing among school teachers in Malaysia (CLUSTer) | 2014 | 2015 | Malaysia | Both urban and rural     | 4801  | 19 | 70 | Yes | Yes | FFQ                     | Locally representative        |
| GDD 2017 | Dietary intake of second and third trimester pregnant women in East Coast of Peninsular Malaysia                                                       | 2014 | 2015 | Malaysia | Only urban               | 601   | 17 | 46 | No  | Yes | Single 24-hour recall   | Sub-nationally representative |
| GDD 2017 | PREDICTORS OF POSTPARTUM WEIGHT RETENTION AMONG URBAN MALAYSIAN MOTHERS: A PROSPECTIVE COHORT STUDY                                                    | 2013 | 2014 | Malaysia | Only urban               | 420   | 19 | 43 | No  | Yes | FFQ                     | Locally representative        |
| GDD 2017 | Antenatal calcium intake in Malaysia                                                                                                                   | 2006 | 2006 | Malaysia | Only urban               | 150   | 16 | 44 | No  | Yes | Multiple 24-hour recall | Locally representative        |
| GDD 2017 | Global Student Based Student Health Survey 2012                                                                                                        | 2012 | 2012 | Malaysia | Both urban and rural     | 25448 | 7  | 16 | Yes | Yes | FFQ                     | Nationally representative     |
| GDD 2017 | World Health Survey 2003                                                                                                                               | 2003 | 2003 | Malaysia | Both urban and rural     | 5638  | 18 | 97 | Yes | Yes | FFQ                     | Nationally representative     |
| GDD 2010 | Malaysian Adult Nutrition Survey 2003                                                                                                                  | 2002 | 2003 | Malaysia | Information not reported | 1000  | 18 | 59 | Yes | Yes | Single 24-hour recall   | Nationally representative     |
| GDD 2010 | Malaysian Adults Nutrition Survey                                                                                                                      | 2003 | 2003 | Malaysia | Information not reported | 866   | 20 | 59 | Yes | Yes | FFQ                     | Nationally representative     |
| GDD 2017 | Global Student Based Student Health Survey 2009                                                                                                        | 2009 | 2009 | Maldives | Both urban and rural     | 3134  | 11 | 16 | Yes | Yes | FFQ                     | Nationally representative     |
| GDD 2017 | Demographic and Health Survey Maldives 2009                                                                                                            | 2009 | 2009 | Maldives | Both urban and rural     | 5037  | 0  | 48 | Yes | Yes | DHS questionnaire       | Nationally representative     |

|          |                                                                                                               |      |      |       |                                 |       |    |     |     |     |                                      |                                      |
|----------|---------------------------------------------------------------------------------------------------------------|------|------|-------|---------------------------------|-------|----|-----|-----|-----|--------------------------------------|--------------------------------------|
| GDD 2017 | World Health Survey 2003                                                                                      | 2003 | 2003 | Mali  | <i>Both urban and rural</i>     | 1738  | 15 | 98  | Yes | Yes | FFQ                                  | <i>Nationally representative</i>     |
| GDD 2017 | Demographic and Health Survey Mali 2010                                                                       | 2010 | 2010 | Mali  | <i>Both urban and rural</i>     | 1760  | 1  | 5   | Yes | Yes | Biomarker                            | <i>Nationally representative</i>     |
| GDD 2017 | Demographic and Health Survey Mali 2012                                                                       | 2012 | 2013 | Mali  | <i>Both urban and rural</i>     | 15613 | 0  | 49  | Yes | Yes | DHS questionnaire                    | <i>Nationally representative</i>     |
| GDD 2017 | Demographic and Health Survey Mali 2001                                                                       | 2001 | 2001 | Mali  | <i>Both urban and rural</i>     | 13561 | 0  | 49  | Yes | Yes | DHS questionnaire                    | <i>Nationally representative</i>     |
| GDD 2017 | Demographic and Health Survey Mali 2006                                                                       | 2006 | 2006 | Mali  | <i>Both urban and rural</i>     | 11961 | 0  | 49  | Yes | Yes | DHS questionnaire                    | <i>Nationally representative</i>     |
| GDD 2010 | Dietary Diversity as a Measure of the Micronutrient Adequacy of Women's Diets: Results from Bamako, Mali Site | 2007 | 2007 | Mali  | <i>Information not reported</i> | 100   | 15 | 49  | No  | Yes | Multiple 24-hour recall              | <i>Sub-nationally representative</i> |
| GDD 2017 | MGSD Gestational Diabetes in the Mediterranean Region                                                         | 2010 | 2013 | Malta | <i>Only rural</i>               | 124   | 17 | 41  | No  | Yes | FFQ                                  | <i>Locally representative</i>        |
| GDD 2017 | Health Behavior in School-Aged Children 2002                                                                  | 2001 | 2002 | Malta | <i>Both urban and rural</i>     | 1945  | 11 | 17  | Yes | Yes | FFQ                                  | <i>Nationally representative</i>     |
| GDD 2017 | Health Behavior in School-Aged Children 2006                                                                  | 2006 | 2006 | Malta | <i>Both urban and rural</i>     | 1385  | 11 | 15  | Yes | Yes | FFQ                                  | <i>Nationally representative</i>     |
| GDD 2010 | Maltese Community Health and Nutrition Survey                                                                 | 1994 | 1994 | Malta | <i>Information not reported</i> | 1000  | 0  | 100 | Yes | Yes | Household availability/budget survey | <i>Nationally representative</i>     |
| GDD 2010 | Maltese Community Health and Nutrition Survey                                                                 | 1995 | 1995 | Malta | <i>Information not reported</i> | 1000  | 0  | 100 | Yes | Yes | Household availability/budget survey | <i>Nationally representative</i>     |
| GDD 2010 | Maltese Community Health and Nutrition Survey                                                                 | 2000 | 2000 | Malta | <i>Information not reported</i> | 1000  | 0  | 100 | Yes | Yes | Household availability/budget survey | <i>Nationally representative</i>     |
| GDD 2010 | 2nd European Health Interview Survey                                                                          | 2008 | 2008 | Malta | <i>Information not reported</i> | 1000  | 15 | 96  | Yes | Yes | Single 24-hour recall                | <i>Nationally representative</i>     |
| GDD 2010 | INTERSALT, Dingli village                                                                                     | 1985 | 1987 | Malta | <i>Information not reported</i> | 25    | 20 | 59  | Yes | Yes | Biomarker                            | <i>Locally representative</i>        |

|          |                                                                                                                                               |      |      |                                 |                                 |       |    |     |     |     |                   |                               |
|----------|-----------------------------------------------------------------------------------------------------------------------------------------------|------|------|---------------------------------|---------------------------------|-------|----|-----|-----|-----|-------------------|-------------------------------|
| GDD 2010 | WHO STEPwise approach to Surveillance of Non-Communicable Diseases (STEPS) Republic of the Marshall Islands Report DRAFT Version 2.5 May 2007 | 2002 | 2002 | Marshall Islands                | <i>Information not reported</i> | 1000  | 15 | 64  | Yes | Yes | FFQ               | Nationally representative     |
| GDD 2017 | Global Student Based Student Health Survey 2010                                                                                               | 2010 | 2010 | Mauritania                      | <i>Both urban and rural</i>     | 1997  | 11 | 16  | Yes | Yes | FFQ               | Nationally representative     |
| GDD 2017 | World Health Survey 2003                                                                                                                      | 2003 | 2003 | Mauritania                      | <i>Both urban and rural</i>     | 2782  | 15 | 90  | Yes | Yes | FFQ               | Nationally representative     |
| GDD 2010 | STEP Mauritania                                                                                                                               | 2006 | 2006 | Mauritania                      | <i>Information not reported</i> | 1000  | 15 | 64  | Yes | Yes | FFQ               | Sub-nationally representative |
| GDD 2017 | FOOD HABITS AND ENERGY INTAKE AMONG THE MAURITIAN POPULATION                                                                                  | 2014 | 2015 | Mauritius                       | <i>Both urban and rural</i>     | 897   | 6  | 55  | Yes | Yes | FFQ               | Nationally representative     |
| GDD 2017 | Dietary Habits and energy Intake-Mauritius population                                                                                         | 2013 | 2014 | Mauritius                       | <i>Both urban and rural</i>     | 1009  | 11 | 65  | Yes | Yes | FFQ               | Sub-nationally representative |
| GDD 2017 | Global Student Based Student Health Survey 2011                                                                                               | 2011 | 2011 | Mauritius                       | <i>Both urban and rural</i>     | 2161  | 11 | 16  | Yes | Yes | FFQ               | Nationally representative     |
| GDD 2017 | World Health Survey 2003                                                                                                                      | 2003 | 2003 | Mauritius                       | <i>Both urban and rural</i>     | 3158  | 18 | 93  | Yes | Yes | FFQ               | Nationally representative     |
| GDD 2017 | Study of Global Ageing and Adult Health                                                                                                       | 2007 | 2013 | Mexico                          | <i>Both urban and rural</i>     | 2592  | 22 | 101 | Yes | Yes | FFQ               | Nationally representative     |
| GDD 2017 | Demographic and Health Survey Mexico 1987                                                                                                     | 1987 | 1987 | Mexico                          | <i>Both urban and rural</i>     | 876   | 0  | 4   | Yes | Yes | DHS questionnaire | Nationally representative     |
| GDD 2017 | ENSANUT                                                                                                                                       | 2006 | 2006 | Mexico                          | <i>Both urban and rural</i>     | 24271 | 12 | 59  | Yes | Yes | FFQ               | Nationally representative     |
| GDD 2010 | National Health and Nutrition Survey 2006 ( Mexico)                                                                                           | 2005 | 2006 | Mexico                          | <i>Information not reported</i> | 1000  | 20 | 59  | Yes | Yes | FFQ               | Nationally representative     |
| GDD 2010 | INTERSALT, Chihuahua                                                                                                                          | 1985 | 1987 | Mexico                          | <i>Information not reported</i> | 23    | 20 | 59  | Yes | Yes | Biomarker         | Sub-nationally representative |
| GDD 2010 | Federal States of Micronesia (Pohnpei) NCD Risk Factors STEPS Report                                                                          | 2002 | 2002 | Micronesia, Federated States Of | <i>Information not reported</i> | 1000  | 25 | 64  | Yes | Yes | FFQ               | Sub-nationally representative |
| GDD 2010 | Living Conditions Lifestyles and Health                                                                                                       | 2001 | 2002 | Moldova                         | <i>Information not reported</i> | 1000  | 18 | 99  | Yes | Yes | FFQ               | Nationally representative     |
| GDD 2017 | Global Student Based Student Health Survey 2013                                                                                               | 2013 | 2013 | Mongolia                        | <i>Both urban and rural</i>     | 5355  | 7  | 16  | Yes | Yes | FFQ               | Nationally representative     |

|          |                                                                                                                                                                                                                |      |      |            |                          |       |    |     |     |     |                                          |                           |
|----------|----------------------------------------------------------------------------------------------------------------------------------------------------------------------------------------------------------------|------|------|------------|--------------------------|-------|----|-----|-----|-----|------------------------------------------|---------------------------|
| GDD 2010 | Mongolian STEPS survey on the prevalence of noncommunicable disease risk factors 2006                                                                                                                          | 2005 | 2005 | Mongolia   | Information not reported | 1000  | 15 | 64  | Yes | Yes | FFQ                                      | Nationally representative |
| GDD 2010 | STEP Mongolia                                                                                                                                                                                                  | 2009 | 2009 | Mongolia   | Information not reported | 1000  | 15 | 64  | Yes | Yes | FFQ                                      | Nationally representative |
| GDD 2010 | Yamada et al.                                                                                                                                                                                                  | 1998 | 1998 | Mongolia   | Information not reported | 193   | 20 | 44  | Yes | Yes | Biomarker                                | Nationally representative |
| GDD 2010 | Montenegrin Community Health and Nutrition Survey                                                                                                                                                              | 2003 | 2003 | Montenegro | Information not reported | 1000  | 0  | 100 | Yes | Yes | Household availability/<br>budget survey | Nationally representative |
| GDD 2010 | Montenegrin Community Health and Nutrition Survey                                                                                                                                                              | 2004 | 2004 | Montenegro | Information not reported | 1000  | 0  | 100 | Yes | Yes | Household availability/<br>budget survey | Nationally representative |
| GDD 2017 | Combined consumption of a single high-dose vitamin A supplement and provision of vitamin A fortified oil to households maintains adequate milk retinol concentrations for 6 months in lactating Moroccan women | 2009 | 2010 | Morocco    | Only urban               | 92    | 15 | 45  | No  | Yes | FFQ                                      | Locally representative    |
| GDD 2017 | Arab Teens Lifestyle Study (ATLS)                                                                                                                                                                              | 2011 | 2012 | Morocco    | Only urban               | 558   | 15 | 25  | Yes | Yes | FFQ                                      | Locally representative    |
| GDD 2017 | Inadequacy of vitamins and minerals among high-school pupils in Ouarzazate, Morocco                                                                                                                            | 2007 | 2008 | Morocco    | Both urban and rural     | 346   | 15 | 27  | Yes | Yes | Multiple 24-hour recall                  | Locally representative    |
| GDD 2017 | Global Student Based Student Health Survey 2006                                                                                                                                                                | 2006 | 2006 | Morocco    | Both urban and rural     | 2527  | 11 | 16  | Yes | Yes | FFQ                                      | Nationally representative |
| GDD 2017 | World Health Survey 2003                                                                                                                                                                                       | 2003 | 2003 | Morocco    | Both urban and rural     | 2073  | 18 | 98  | Yes | No  | FFQ                                      | Nationally representative |
| GDD 2017 | Global Student Based Student Health Survey 2010                                                                                                                                                                | 2010 | 2010 | Morocco    | Both urban and rural     | 2852  | 11 | 16  | Yes | Yes | FFQ                                      | Nationally representative |
| GDD 2017 | STEPS                                                                                                                                                                                                          | 2005 | 2005 | Mozambique | Both urban and rural     | 3289  | 25 | 64  | Yes | Yes | DHS questionnaire                        | Nationally representative |
| GDD 2017 | Food Consumption and Culinary Practices in Maputo, Mozambique                                                                                                                                                  | 2012 | 2013 | Mozambique | Only urban               | 100   | 25 | 62  | Yes | Yes | Single 24-hour recall                    | Locally representative    |
| GDD 2017 | Demographic and Health Survey Mozambique 2011                                                                                                                                                                  | 2011 | 2011 | Mozambique | Both urban and rural     | 22864 | 0  | 49  | Yes | Yes | DHS questionnaire                        | Nationally representative |

|          |                                                                                                                   |      |      |            |                                 |       |    |     |     |     |                         |                               |
|----------|-------------------------------------------------------------------------------------------------------------------|------|------|------------|---------------------------------|-------|----|-----|-----|-----|-------------------------|-------------------------------|
| GDD 2010 | Dietary Diversity as a Measure of the Micronutrient Adequacy of Women's Diets: Results from Rural Mozambique Site | 2006 | 2006 | Mozambique | <i>Information not reported</i> | 250   | 15 | 49  | No  | Yes | Single 24-hour recall   | Sub-nationally representative |
| GDD 2017 | Global Student Based Student Health Survey 2007                                                                   | 2007 | 2007 | Myanmar    | <i>Both urban and rural</i>     | 2784  | 11 | 16  | Yes | Yes | FFQ                     | Nationally representative     |
| GDD 2017 | World Health Survey 2003                                                                                          | 2003 | 2003 | Myanmar    | <i>Both urban and rural</i>     | 5886  | 18 | 99  | Yes | Yes | FFQ                     | Nationally representative     |
| GDD 2017 | World Health Survey 2003                                                                                          | 2003 | 2003 | Namibia    | <i>Both urban and rural</i>     | 3610  | 18 | 103 | Yes | Yes | FFQ                     | Nationally representative     |
| GDD 2017 | Demographic and Health Survey Namibia 2006                                                                        | 2006 | 2007 | Namibia    | <i>Both urban and rural</i>     | 5833  | 0  | 49  | Yes | Yes | DHS questionnaire       | Nationally representative     |
| GDD 2017 | Demographic and Health Survey Namibia 2013                                                                        | 2013 | 2013 | Namibia    | <i>Both urban and rural</i>     | 17590 | 0  | 64  | Yes | Yes | DHS questionnaire       | Nationally representative     |
| GDD 2017 | Global Student Based Student Health Survey 2013                                                                   | 2013 | 2013 | Namibia    | <i>Both urban and rural</i>     | 4429  | 7  | 16  | Yes | Yes | FFQ                     | Nationally representative     |
| GDD 2017 | Global Student Based Student Health Survey 2011                                                                   | 2011 | 2011 | Nauru      | <i>Only urban</i>               | 532   | 11 | 16  | Yes | Yes | FFQ                     | Nationally representative     |
| GDD 2010 | Nauru NCD risk factors STEPS report                                                                               | 2004 | 2004 | Nauru      | <i>Information not reported</i> | 1000  | 15 | 64  | Yes | Yes | FFQ                     | Nationally representative     |
| GDD 2017 | Bhaktapur Female Dietary Survey                                                                                   | 2001 | 2001 | Nepal      | <i>Both urban and rural</i>     | 379   | 15 | 35  | No  | Yes | FFQ                     | Locally representative        |
| GDD 2017 | Micronutrient status in breastfeeding women and their babies in Bhaktapur Nepal -                                 | 2008 | 2009 | Nepal      | <i>Both urban and rural</i>     | 466   | 17 | 44  | No  | Yes | Multiple 24-hour recall | Sub-nationally representative |
| GDD 2017 | Demographic and Health Survey Nepal 2001                                                                          | 2001 | 2001 | Nepal      | <i>Both urban and rural</i>     | 5170  | 0  | 4   | Yes | Yes | DHS questionnaire       | Nationally representative     |
| GDD 2017 | Demographic and Health Survey Nepal 2006                                                                          | 2006 | 2006 | Nepal      | <i>Both urban and rural</i>     | 16077 | 0  | 49  | Yes | Yes | DHS questionnaire       | Nationally representative     |
| GDD 2017 | Demographic and Health Survey Nepal 2011                                                                          | 2011 | 2011 | Nepal      | <i>Both urban and rural</i>     | 9917  | 0  | 49  | Yes | Yes | DHS questionnaire       | Nationally representative     |
| GDD 2017 | Nepal World Health Survey 2003                                                                                    | 2003 | 2003 | Nepal      | <i>Both urban and rural</i>     | 8678  | 15 | 102 | Yes | Yes | FFQ                     | Nationally representative     |



|          |                                                                                                        |      |      |             |                                 |      |    |     |     |     |                         |                               |
|----------|--------------------------------------------------------------------------------------------------------|------|------|-------------|---------------------------------|------|----|-----|-----|-----|-------------------------|-------------------------------|
| GDD 2010 | Food consumption patterns and nutrient intake among Nepalese living in the southern rural Terai region | 1989 | 1989 | Nepal       | <i>Information not reported</i> | 100  | 10 | 68  | Yes | Yes | Single 24-hour recall   | Sub-nationally representative |
| GDD 2017 | Diet of community-dwelling older adults 2010-2012                                                      | 2010 | 2012 | Netherlands | <i>Both urban and rural</i>     | 1478 | 70 | 94  | Yes | Yes | Multiple 24-hour recall | Nationally representative     |
| GDD 2017 | Dutch National Food Consumption Survey 2007-2010 Diet of Children and adults aged 7-69 years           | 2007 | 2010 | Netherlands | <i>Both urban and rural</i>     | 7630 | 7  | 69  | Yes | Yes | Multiple 24-hour recall | Nationally representative     |
| GDD 2017 | Health Behavior in School-Aged Children 2002                                                           | 2001 | 2002 | Netherlands | <i>Both urban and rural</i>     | 4268 | 11 | 16  | Yes | Yes | FFQ                     | Nationally representative     |
| GDD 2017 | Health Behavior in School-Aged Children 2006                                                           | 2006 | 2006 | Netherlands | <i>Both urban and rural</i>     | 4217 | 11 | 15  | Yes | Yes | FFQ                     | Nationally representative     |
| GDD 2017 | Health Behavior in School-Aged Children 2010                                                           | 2010 | 2010 | Netherlands | <i>Both urban and rural</i>     | 4506 | 11 | 15  | Yes | Yes | FFQ                     | Nationally representative     |
| GDD 2010 | Dutch National Food Consumption Survey                                                                 | 1987 | 1988 | Netherlands | <i>Information not reported</i> | 1000 | 20 | 85  | Yes | Yes | Multiple 24-hour recall | Nationally representative     |
| GDD 2010 | Dutch National Food Consumption Survey                                                                 | 1992 | 1992 | Netherlands | <i>Information not reported</i> | 1000 | 20 | 92  | Yes | Yes | Multiple 24-hour recall | Nationally representative     |
| GDD 2010 | Dutch National Food Consumption Survey                                                                 | 1997 | 1998 | Netherlands | <i>Information not reported</i> | 1000 | 20 | 97  | Yes | Yes | Multiple 24-hour recall | Nationally representative     |
| GDD 2010 | Dutch National Food Consumption Survey                                                                 | 1997 | 1998 | Netherlands | <i>Information not reported</i> | 1000 | 15 | 100 | Yes | Yes | Multiple 24-hour recall | Nationally representative     |
| GDD 2010 | Dutch National Food Consumption Survey                                                                 | 2003 | 2003 | Netherlands | <i>Information not reported</i> | 500  | 20 | 31  | Yes | Yes | Multiple 24-hour recall | Nationally representative     |
| GDD 2010 | Dutch National Food Consumption Survey - Young Children                                                | 2005 | 2006 | Netherlands | <i>Information not reported</i> | 1000 | 4  | 14  | Yes | Yes | Multiple 24-hour recall | Nationally representative     |
| GDD 2010 | Participants of Doetinchem Cohort Study                                                                | 2006 | 2006 | Netherlands | <i>Information not reported</i> | 250  | 19 | 70  | Yes | Yes | Single 24-hour recall   | Locally representative        |
| GDD 2010 | TRANSFAIR study                                                                                        | 1992 | 1992 | Netherlands | <i>Information not reported</i> | 1000 | 19 | 64  | Yes | Yes | Single 24-hour recall   | Nationally representative     |

|          |                                                                 |      |      |             |                                 |       |    |     |     |     |                                |                                      |
|----------|-----------------------------------------------------------------|------|------|-------------|---------------------------------|-------|----|-----|-----|-----|--------------------------------|--------------------------------------|
| GDD 2010 | INTERSALT, Zutphen                                              | 1985 | 1987 | Netherlands | <i>Information not reported</i> | 25    | 20 | 59  | Yes | Yes | <i>Biomarker</i>               | <i>Sub-nationally representative</i> |
| GDD 2010 | Ocke et al.                                                     | 2006 | 2006 | Netherlands | <i>Information not reported</i> | 6     | 20 | 74  | Yes | Yes | <i>Biomarker</i>               | <i>Sub-nationally representative</i> |
| GDD 2010 | NZ National Nutrition Survey 1997                               | 1997 | 1997 | New Zealand | <i>Information not reported</i> | 1000  | 15 | 100 | Yes | Yes | <i>Multiple 24-hour recall</i> | <i>Nationally representative</i>     |
| GDD 2010 | NZ Childrens Nutrition Survey                                   | 2002 | 2002 | New Zealand | <i>Information not reported</i> | 1000  | 5  | 14  | Yes | Yes | <i>Multiple 24-hour recall</i> | <i>Nationally representative</i>     |
| GDD 2010 | Simpson et al.                                                  | 1981 | 1981 | New Zealand | <i>Information not reported</i> | 113   | 20 | 93  | Yes | Yes | <i>Biomarker</i>               | <i>Sub-nationally representative</i> |
| GDD 2010 | Thomson and Colls                                               | 1993 | 1998 | New Zealand | <i>Information not reported</i> | 55    | 20 | 69  | Yes | Yes | <i>Biomarker</i>               | <i>Sub-nationally representative</i> |
| GDD 2017 | Demographic and Health Survey Niger 2006                        | 2006 | 2006 | Niger       | <i>Both urban and rural</i>     | 14154 | 0  | 59  | Yes | Yes | <i>DHS questionnaire</i>       | <i>Nationally representative</i>     |
| GDD 2017 | Demographic and Health Survey Niger 2012                        | 2012 | 2012 | Niger       | <i>Both urban and rural</i>     | 18169 | 0  | 59  | Yes | Yes | <i>DHS questionnaire</i>       | <i>Nationally representative</i>     |
| GDD 2010 | Measurement of NCD Risk Factors in Niger WHO STEP wise Approach | 2007 | 2007 | Niger       | <i>Information not reported</i> | 1000  | 15 | 64  | Yes | Yes | <i>FFQ</i>                     | <i>Nationally representative</i>     |
| GDD 2010 | Street foods and dietary intakes of Nigerian urban market women | 1995 | 1995 | Niger       | <i>Information not reported</i> | 100   | 19 | 66  | No  | Yes | <i>Multiple 24-hour recall</i> | <i>Locally representative</i>        |
| GDD 2017 | Demographic and Health Survey Nigeria 2008                      | 2008 | 2008 | Nigeria     | <i>Both urban and rural</i>     | 35175 | 0  | 49  | Yes | Yes | <i>DHS questionnaire</i>       | <i>Nationally representative</i>     |
| GDD 2017 | Demographic and Health Survey Nigeria 2013                      | 2013 | 2013 | Nigeria     | <i>Both urban and rural</i>     | 19153 | 0  | 4   | Yes | Yes | <i>DHS questionnaire</i>       | <i>Nationally representative</i>     |
| GDD 2017 | Demographic and Health Survey Nigeria 2015                      | 2015 | 2015 | Nigeria     | <i>Both urban and rural</i>     | 5298  | 0  | 4   | Yes | Yes | <i>Biomarker</i>               | <i>Nationally representative</i>     |
| GDD 2010 | Cooper et al.                                                   | 1991 | 1994 | Nigeria     | <i>Information not reported</i> | 2509  | 45 | 94  | Yes | Yes | <i>Biomarker</i>               | <i>Sub-nationally representative</i> |
| GDD 2017 | Global Student Based Student Health Survey 2010                 | 2010 | 2010 | Niue        | <i>Both urban and rural</i>     | 141   | 11 | 16  | Yes | Yes | <i>FFQ</i>                     | <i>Nationally representative</i>     |
| GDD 2010 | Taylor et al. (1 of 3)                                          | 1980 | 1981 | Niue        | <i>Information not reported</i> | 19    | 20 | 79  | Yes | Yes | <i>Biomarker</i>               | <i>Nationally representative</i>     |
| GDD 2017 | Health Behavior in School-Aged Children 1990                    | 1989 | 1990 | Norway      | <i>Both urban and rural</i>     | 4985  | 10 | 16  | Yes | Yes | <i>FFQ</i>                     | <i>Nationally representative</i>     |

|          |                                                       |      |      |        |                          |      |    |     |     |     |                                          |                           |
|----------|-------------------------------------------------------|------|------|--------|--------------------------|------|----|-----|-----|-----|------------------------------------------|---------------------------|
| GDD 2017 | Health Behavior in School-Aged Children 1994          | 1993 | 1994 | Norway | Both urban and rural     | 4897 | 11 | 16  | Yes | Yes | FFQ                                      | Nationally representative |
| GDD 2017 | Health Behavior in School-Aged Children 1998          | 1998 | 1998 | Norway | Both urban and rural     | 4983 | 11 | 16  | Yes | Yes | FFQ                                      | Nationally representative |
| GDD 2017 | Health Behavior in School-Aged Children 2002          | 2001 | 2002 | Norway | Both urban and rural     | 5015 | 11 | 16  | Yes | Yes | FFQ                                      | Nationally representative |
| GDD 2017 | Health Behavior in School-Aged Children 2006          | 2006 | 2006 | Norway | Both urban and rural     | 4675 | 11 | 15  | Yes | Yes | FFQ                                      | Nationally representative |
| GDD 2017 | Health Behavior in School-Aged Children 2010          | 2010 | 2010 | Norway | Both urban and rural     | 4307 | 11 | 15  | Yes | Yes | FFQ                                      | Nationally representative |
| GDD 2010 | Norwegian Community Health and Nutrition Survey       | 1986 | 1988 | Norway | Information not reported | 1000 | 0  | 100 | Yes | Yes | Household availability/<br>budget survey | Nationally representative |
| GDD 2010 | Norwegian Community Health and Nutrition Survey       | 1992 | 1994 | Norway | Information not reported | 1000 | 0  | 100 | Yes | Yes | Household availability/<br>budget survey | Nationally representative |
| GDD 2010 | Norwegian national dietary survey 1997 (Norkost 1997) | 1997 | 1997 | Norway | Information not reported | 1000 | 20 | 79  | Yes | Yes | FFQ                                      | Nationally representative |
| GDD 2010 | Norwegian national dietary survey 1997 (Norkost 1997) | 1997 | 1997 | Norway | Information not reported | 1000 | 15 | 18  | Yes | Yes | FFQ                                      | Nationally representative |
| GDD 2010 | Norwegian Community Health and Nutrition Survey       | 1996 | 1998 | Norway | Information not reported | 1000 | 0  | 100 | Yes | Yes | Household availability/<br>budget survey | Nationally representative |
| GDD 2010 | Nutritional Status of Norwegian children              | 2000 | 2000 | Norway | Information not reported | 1000 | 4  | 13  | Yes | Yes | Multiple 24-<br>hour recall              | Nationally representative |
| GDD 2010 | TRANSFAIR study                                       | 1993 | 1994 | Norway | Information not reported | 1000 | 19 | 64  | Yes | Yes | FFQ                                      | Nationally representative |
| GDD 2017 | Global Student Based Student Health Survey 2005       | 2005 | 2005 | Oman   | Both urban and rural     | 2906 | 11 | 16  | Yes | Yes | FFQ                                      | Nationally representative |
| GDD 2017 | Global Student Based Student Health Survey 2010       | 2010 | 2010 | Oman   | Both urban and rural     | 1532 | 11 | 16  | Yes | Yes | FFQ                                      | Nationally representative |

|          |                                                                                             |      |      |                                 |                          |       |    |     |     |     |                   |                           |
|----------|---------------------------------------------------------------------------------------------|------|------|---------------------------------|--------------------------|-------|----|-----|-----|-----|-------------------|---------------------------|
| GDD 2017 | Relation between nutritional status and immune functions in old Pakistanis                  | 2008 | 2009 | Pakistan                        | Both urban and rural     | 750   | 18 | 95  | Yes | Yes | FFQ               | Locally representative    |
| GDD 2017 | World Health Survey 2003                                                                    | 2003 | 2003 | Pakistan                        | Both urban and rural     | 5931  | 18 | 110 | Yes | Yes | FFQ               | Nationally representative |
| GDD 2017 | Demographic and Health Survey Pakistan 2012                                                 | 2012 | 2013 | Pakistan                        | Both urban and rural     | 6821  | 0  | 4   | Yes | Yes | DHS questionnaire | Nationally representative |
| GDD 2017 | Global Student Based Student Health Survey 2009                                             | 2009 | 2009 | Pakistan                        | Both urban and rural     | 5177  | 11 | 16  | Yes | Yes | FFQ               | Nationally representative |
| GDD 2010 | National Health Survey of Pakistan                                                          | 1991 | 1994 | Pakistan                        | Information not reported | 1000  | 0  | 110 | Yes | Yes | FFQ               | Nationally representative |
| GDD 2017 | Global Student Based Student Health Survey 2010                                             | 2010 | 2010 | Palestinian Territory, Occupied | Both urban and rural     | 8545  | 11 | 16  | Yes | Yes | FFQ               | Nationally representative |
| GDD 2010 | WHO STEPS Chronic Disease Risk Factor Surveillance Data Book for Papua New Guinea 2007-2008 | 2007 | 2007 | Papua New Guinea                | Information not reported | 1000  | 25 | 64  | Yes | Yes | FFQ               | Nationally representative |
| GDD 2017 | World Health Survey 2003                                                                    | 2003 | 2003 | Paraguay                        | Both urban and rural     | 4801  | 18 | 95  | Yes | Yes | FFQ               | Nationally representative |
| GDD 2017 | Global Student Based Student Health Survey 2010                                             | 2010 | 2010 | Peru                            | Both urban and rural     | 2855  | 11 | 16  | Yes | Yes | FFQ               | Nationally representative |
| GDD 2017 | Demographic and Health Survey Peru 2004                                                     | 2004 | 2006 | Peru                            | Both urban and rural     | 11521 | 0  | 49  | Yes | Yes | DHS questionnaire | Nationally representative |
| GDD 2017 | Demographic and Health Survey Peru 2009                                                     | 2009 | 2009 | Peru                            | Both urban and rural     | 7100  | 0  | 4   | Yes | Yes | DHS questionnaire | Nationally representative |
| GDD 2017 | Demographic and Health Survey Peru 2007                                                     | 2007 | 2008 | Peru                            | Both urban and rural     | 27897 | 0  | 49  | Yes | Yes | DHS questionnaire | Nationally representative |
| GDD 2017 | Demographic and Health Survey Peru 2010                                                     | 2010 | 2010 | Peru                            | Both urban and rural     | 30937 | 0  | 49  | Yes | Yes | DHS questionnaire | Nationally representative |
| GDD 2017 | Demographic and Health Survey Peru 2011                                                     | 2011 | 2011 | Peru                            | Both urban and rural     | 30625 | 0  | 49  | Yes | Yes | DHS questionnaire | Nationally representative |
| GDD 2017 | Demographic and Health Survey Peru 2012                                                     | 2012 | 2012 | Peru                            | Both urban and rural     | 32728 | 0  | 49  | Yes | Yes | DHS questionnaire | Nationally representative |

|          |                                                      |      |      |             |                          |       |    |     |     |     |                         |                           |
|----------|------------------------------------------------------|------|------|-------------|--------------------------|-------|----|-----|-----|-----|-------------------------|---------------------------|
| GDD 2017 | Demographic and Health Survey Peru 1996              | 1996 | 1996 | Peru        | Both urban and rural     | 14391 | 0  | 49  | Yes | Yes | DHS questionnaire       | Nationally representative |
| GDD 2017 | Demographic and Health Survey Peru 2000              | 2000 | 2000 | Peru        | Both urban and rural     | 16472 | 0  | 49  | Yes | Yes | DHS questionnaire       | Nationally representative |
| GDD 2017 | Cebu Longitudinal Health and Nutrition Survey        | 1993 | 1994 | Philippines | Both urban and rural     | 2181  | 10 | 12  | Yes | Yes | Multiple 24-hour recall | Locally representative    |
| GDD 2017 | Cebu Longitudinal Health and Nutrition Survey        | 1997 | 1998 | Philippines | Both urban and rural     | 4174  | 14 | 16  | Yes | Yes | Multiple 24-hour recall | Locally representative    |
| GDD 2017 | Cebu Longitudinal Health and Nutrition Survey        | 2001 | 2002 | Philippines | Both urban and rural     | 4045  | 17 | 19  | Yes | Yes | Multiple 24-hour recall | Locally representative    |
| GDD 2017 | Cebu Longitudinal Health and Nutrition Survey        | 2004 | 2005 | Philippines | Both urban and rural     | 3773  | 20 | 22  | Yes | Yes | Multiple 24-hour recall | Locally representative    |
| GDD 2017 | Global Student Based Student Health Survey 2011      | 2011 | 2011 | Philippines | Both urban and rural     | 5227  | 11 | 16  | Yes | Yes | FFQ                     | Nationally representative |
| GDD 2017 | Global Student Based Student Health Survey 2003      | 2003 | 2003 | Philippines | Both urban and rural     | 7074  | 11 | 16  | Yes | Yes | FFQ                     | Nationally representative |
| GDD 2017 | Global Student Based Student Health Survey 2007      | 2007 | 2007 | Philippines | Both urban and rural     | 5583  | 11 | 16  | Yes | Yes | FFQ                     | Nationally representative |
| GDD 2017 | Demographic and Health Survey Philippines 1998       | 1998 | 1998 | Philippines | Both urban and rural     | 7603  | 0  | 4   | Yes | Yes | DHS questionnaire       | Nationally representative |
| GDD 2017 | World Health Survey 2003                             | 2003 | 2003 | Philippines | Both urban and rural     | 9009  | 18 | 94  | Yes | Yes | FFQ                     | Nationally representative |
| GDD 2017 | Demographic and Health Survey Philippines 2003       | 2003 | 2003 | Philippines | Both urban and rural     | 4729  | 0  | 4   | Yes | Yes | DHS questionnaire       | Nationally representative |
| GDD 2017 | Demographic and Health Survey Philippines 2008       | 2008 | 2008 | Philippines | Both urban and rural     | 8204  | 0  | 49  | Yes | Yes | DHS questionnaire       | Nationally representative |
| GDD 2010 | 6TH NATIONAL NUTRITION SURVEY, PHILIPPINES           | 2003 | 2003 | Philippines | Information not reported | 1000  | 20 | 100 | Yes | Yes | FFQ                     | Nationally representative |
| GDD 2017 | Household Food Consumption and Anthropometric Survey | 2000 | 2000 | Poland      | Both urban and rural     | 4110  | 2  | 100 | Yes | Yes | Single 24-hour recall   | Nationally representative |

|          |                                                                                                                                                                                                           |      |      |        |                                 |      |    |     |     |     |                                             |                                      |
|----------|-----------------------------------------------------------------------------------------------------------------------------------------------------------------------------------------------------------|------|------|--------|---------------------------------|------|----|-----|-----|-----|---------------------------------------------|--------------------------------------|
| GDD 2017 | WOBASZ II                                                                                                                                                                                                 | 2013 | 2014 | Poland | <i>Both urban and rural</i>     | 5690 | 18 | 100 | Yes | Yes | <i>Single 24-hour recall</i>                | <i>Nationally representative</i>     |
| GDD 2017 | Health Behavior in School-Aged Children 1990                                                                                                                                                              | 1989 | 1990 | Poland | <i>Both urban and rural</i>     | 4588 | 11 | 17  | Yes | Yes | <i>FFQ</i>                                  | <i>Nationally representative</i>     |
| GDD 2017 | Health Behavior in School-Aged Children 1994                                                                                                                                                              | 1993 | 1994 | Poland | <i>Both urban and rural</i>     | 4316 | 11 | 16  | Yes | Yes | <i>FFQ</i>                                  | <i>Nationally representative</i>     |
| GDD 2017 | Health Behavior in School-Aged Children 1998                                                                                                                                                              | 1998 | 1998 | Poland | <i>Both urban and rural</i>     | 4833 | 11 | 16  | Yes | Yes | <i>FFQ</i>                                  | <i>Nationally representative</i>     |
| GDD 2017 | Health Behavior in School-Aged Children 2002                                                                                                                                                              | 2001 | 2002 | Poland | <i>Both urban and rural</i>     | 6310 | 11 | 17  | Yes | Yes | <i>FFQ</i>                                  | <i>Nationally representative</i>     |
| GDD 2017 | Health Behavior in School-Aged Children 2006                                                                                                                                                              | 2006 | 2006 | Poland | <i>Both urban and rural</i>     | 5474 | 11 | 15  | Yes | Yes | <i>FFQ</i>                                  | <i>Nationally representative</i>     |
| GDD 2017 | Health Behavior in School-Aged Children 2010                                                                                                                                                              | 2010 | 2010 | Poland | <i>Both urban and rural</i>     | 4223 | 11 | 15  | Yes | Yes | <i>FFQ</i>                                  | <i>Nationally representative</i>     |
| GDD 2010 | Polish Community Health and Nutrition Survey                                                                                                                                                              | 1988 | 1988 | Poland | <i>Information not reported</i> | 1000 | 0  | 100 | Yes | Yes | <i>Household availability/budget survey</i> | <i>Nationally representative</i>     |
| GDD 2010 | Pol-MONICA Warsaw Project  part of WHO MONICA Project (MONitoring of Trends and Determinants of Cardiovascular Diseases) | 1993 | 1993 | Poland | <i>Information not reported</i> | 1000 | 35 | 64  | Yes | Yes | <i>Single 24-hour recall</i>                | <i>Sub-nationally representative</i> |
| GDD 2010 | Household Food Consumption and Anthropometric Survey                                                                                                                                                      | 2000 | 2000 | Poland | <i>Information not reported</i> | 1000 | 20 | 100 | Yes | Yes | <i>Single 24-hour recall</i>                | <i>Nationally representative</i>     |
| GDD 2010 | Household Food Consumption and Anthropometric Survey                                                                                                                                                      | 2000 | 2000 | Poland | <i>Information not reported</i> | 1000 | 4  | 100 | Yes | Yes | <i>Single 24-hour recall</i>                | <i>Nationally representative</i>     |
| GDD 2010 | Pol-MONICA bis Warsaw Project                                                                                                                                                                             | 2001 | 2001 | Poland | <i>Information not reported</i> | 1000 | 20 | 74  | Yes | Yes | <i>Single 24-hour recall</i>                | <i>Sub-nationally representative</i> |
| GDD 2010 | WOBASZ - National Multicenter Health Survey                                                                                                                                                               | 2003 | 2005 | Poland | <i>Information not reported</i> | 1000 | 20 | 74  | Yes | Yes | <i>Single 24-hour recall</i>                | <i>Nationally representative</i>     |
| GDD 2010 | INTERSALT, Warsaw                                                                                                                                                                                         | 1985 | 1987 | Poland | <i>Information not reported</i> | 25   | 20 | 59  | Yes | Yes | <i>Biomarker</i>                            | <i>Sub-nationally representative</i> |

|          |                                                                     |      |      |             |                                 |      |    |     |     |     |                                             |                                      |
|----------|---------------------------------------------------------------------|------|------|-------------|---------------------------------|------|----|-----|-----|-----|---------------------------------------------|--------------------------------------|
| GDD 2010 | INTERSALT, Krakow                                                   | 1985 | 1987 | Poland      | <i>Information not reported</i> | 25   | 20 | 59  | Yes | Yes | <i>Biomarker</i>                            | <i>Sub-nationally representative</i> |
| GDD 2017 | Health Behavior in School-Aged Children 1998                        | 1998 | 1998 | Portugal    | <i>Both urban and rural</i>     | 3632 | 11 | 17  | Yes | Yes | <i>FFQ</i>                                  | <i>Nationally representative</i>     |
| GDD 2017 | Health Behavior in School-Aged Children 2002                        | 2001 | 2002 | Portugal    | <i>Both urban and rural</i>     | 2928 | 11 | 17  | Yes | Yes | <i>FFQ</i>                                  | <i>Nationally representative</i>     |
| GDD 2017 | Health Behavior in School-Aged Children 2006                        | 2006 | 2006 | Portugal    | <i>Both urban and rural</i>     | 3895 | 11 | 15  | Yes | Yes | <i>FFQ</i>                                  | <i>Nationally representative</i>     |
| GDD 2017 | Health Behavior in School-Aged Children 2010                        | 2010 | 2010 | Portugal    | <i>Both urban and rural</i>     | 4020 | 11 | 15  | Yes | Yes | <i>FFQ</i>                                  | <i>Nationally representative</i>     |
| GDD 2010 | Portuguese Community Health and Nutrition Survey                    | 1990 | 1990 | Portugal    | <i>Information not reported</i> | 1000 | 0  | 100 | Yes | Yes | <i>Household availability/budget survey</i> | <i>Nationally representative</i>     |
| GDD 2010 | Portuguese Community Health and Nutrition Survey                    | 1995 | 1995 | Portugal    | <i>Information not reported</i> | 1000 | 0  | 100 | Yes | Yes | <i>Household availability/budget survey</i> | <i>Nationally representative</i>     |
| GDD 2010 | Portuguese Community Health and Nutrition Survey                    | 2000 | 2000 | Portugal    | <i>Information not reported</i> | 1000 | 0  | 100 | Yes | Yes | <i>Household availability/budget survey</i> | <i>Nationally representative</i>     |
| GDD 2010 | Community-based survey of children from primary schools of Portugal | 2002 | 2003 | Portugal    | <i>Information not reported</i> | 1000 | 7  | 9   | Yes | Yes | <i>Single 24-hour recall</i>                | <i>Nationally representative</i>     |
| GDD 2010 | EPITeen Project                                                     | 2003 | 2003 | Portugal    | <i>Information not reported</i> | 1000 | 13 | 100 | Yes | Yes | <i>Single 24-hour recall</i>                | <i>Nationally representative</i>     |
| GDD 2010 | TRANSFAIR study                                                     | 1988 | 1989 | Portugal    | <i>Information not reported</i> | 50   | 38 | 38  | Yes | No  | <i>Single 24-hour recall</i>                | <i>Nationally representative</i>     |
| GDD 2010 | INTERSALT, Cartaxo Village                                          | 1985 | 1987 | Portugal    | <i>Information not reported</i> | 25   | 20 | 59  | Yes | Yes | <i>Biomarker</i>                            | <i>Sub-nationally representative</i> |
| GDD 2010 | Polonia                                                             | 2000 | 2000 | Portugal    | <i>Information not reported</i> | 426  | 20 | 84  | Yes | Yes | <i>Biomarker</i>                            | <i>Sub-nationally representative</i> |
| GDD 2017 | Oral Health Status of 12-year olds residing in PR                   | 2010 | 2011 | Puerto Rico | <i>Both urban and rural</i>     | 785  | 11 | 13  | Yes | Yes | <i>Single 24-hour recall</i>                | <i>Nationally representative</i>     |

|          |                                                                                                                     |      |      |                    |                                 |       |    |     |     |     |                                              |                                  |
|----------|---------------------------------------------------------------------------------------------------------------------|------|------|--------------------|---------------------------------|-------|----|-----|-----|-----|----------------------------------------------|----------------------------------|
| GDD 2017 | Validation and reproducibility of a semi-quantitative food frequency questionnaire for use in Puerto Rican Children | 2002 | 2003 | Puerto Rico        | <i>Only urban</i>               | 554   | 8  | 18  | Yes | Yes | <i>Multiple 24-hour recall</i>               | <i>Locally representative</i>    |
| GDD 2017 | Global Student Based Student Health Survey 2011                                                                     | 2011 | 2011 | Qatar              | <i>Both urban and rural</i>     | 1967  | 11 | 16  | Yes | Yes | <i>FFQ</i>                                   | <i>Nationally representative</i> |
| GDD 2017 | Health Behavior in School-Aged Children 2006                                                                        | 2006 | 2006 | Romania            | <i>Both urban and rural</i>     | 4648  | 11 | 15  | Yes | Yes | <i>FFQ</i>                                   | <i>Nationally representative</i> |
| GDD 2017 | Health Behavior in School-Aged Children 2010                                                                        | 2010 | 2010 | Romania            | <i>Both urban and rural</i>     | 5322  | 11 | 15  | Yes | Yes | <i>FFQ</i>                                   | <i>Nationally representative</i> |
| GDD 2010 | National synthesis, 2006                                                                                            | 2006 | 2006 | Romania            | <i>Information not reported</i> | 1000  | 19 | 100 | Yes | Yes | <i>FFQ</i>                                   | <i>Nationally representative</i> |
| GDD 2017 | Study of Global Ageing and Adult Health                                                                             | 2007 | 2013 | Russian Federation | <i>Both urban and rural</i>     | 3737  | 18 | 100 | Yes | Yes | <i>FFQ</i>                                   | <i>Nationally representative</i> |
| GDD 2017 | World Health Survey 2003                                                                                            | 2003 | 2003 | Russian Federation | <i>Both urban and rural</i>     | 1837  | 18 | 94  | Yes | Yes | <i>FFQ</i>                                   | <i>Nationally representative</i> |
| GDD 2017 | Health Behavior in School-Aged Children 1994                                                                        | 1993 | 1994 | Russian Federation | <i>Both urban and rural</i>     | 4001  | 10 | 16  | Yes | Yes | <i>FFQ</i>                                   | <i>Nationally representative</i> |
| GDD 2017 | Health Behavior in School-Aged Children 1998                                                                        | 1998 | 1998 | Russian Federation | <i>Both urban and rural</i>     | 3991  | 11 | 17  | Yes | Yes | <i>FFQ</i>                                   | <i>Nationally representative</i> |
| GDD 2017 | Health Behavior in School-Aged Children 2002                                                                        | 2001 | 2002 | Russian Federation | <i>Both urban and rural</i>     | 8032  | 11 | 17  | Yes | Yes | <i>FFQ</i>                                   | <i>Nationally representative</i> |
| GDD 2017 | Health Behavior in School-Aged Children 2006                                                                        | 2006 | 2006 | Russian Federation | <i>Both urban and rural</i>     | 8176  | 11 | 15  | Yes | Yes | <i>FFQ</i>                                   | <i>Nationally representative</i> |
| GDD 2017 | Health Behavior in School-Aged Children 2010                                                                        | 2010 | 2010 | Russian Federation | <i>Both urban and rural</i>     | 5133  | 11 | 15  | Yes | Yes | <i>FFQ</i>                                   | <i>Nationally representative</i> |
| GDD 2010 | Russia Longitudinal Monitoring Study- Round 5-1994                                                                  | 1994 | 1994 | Russian Federation | <i>Information not reported</i> | 11258 | 0  | 101 | Yes | Yes | <i>Household availability/ budget survey</i> | <i>Nationally representative</i> |
| GDD 2010 | Russia Longitudinal Monitoring Study- Round 6-1995                                                                  | 1995 | 1995 | Russian Federation | <i>Information not reported</i> | 10291 | 0  | 101 | Yes | Yes | <i>Household availability/ budget survey</i> | <i>Nationally representative</i> |



|          |                                                           |      |      |                    |                                 |       |    |     |     |     |                                          |                           |
|----------|-----------------------------------------------------------|------|------|--------------------|---------------------------------|-------|----|-----|-----|-----|------------------------------------------|---------------------------|
| GDD 2010 | Russia Longitudinal Monitoring Study- Round 7-1996        | 1996 | 1996 | Russian Federation | <i>Information not reported</i> | 10223 | 0  | 97  | Yes | Yes | Household availability/<br>budget survey | Nationally representative |
| GDD 2010 | Russia Longitudinal Monitoring Study- Round 8-(1998-1999) | 1998 | 1999 | Russian Federation | <i>Information not reported</i> | 10643 | 0  | 98  | Yes | Yes | Household availability/<br>budget survey | Nationally representative |
| GDD 2010 | Russia Longitudinal Monitoring Study- Round 9-2000        | 2000 | 2000 | Russian Federation | <i>Information not reported</i> | 10966 | 0  | 101 | Yes | Yes | Household availability/<br>budget survey | Nationally representative |
| GDD 2010 | Living Conditions Lifestyles and Health                   | 2001 | 2002 | Russian Federation | <i>Information not reported</i> | 1000  | 18 | 99  | Yes | Yes | FFQ                                      | Nationally representative |
| GDD 2010 | Russia Longitudinal Monitoring Study- Round 10-2001       | 2001 | 2001 | Russian Federation | <i>Information not reported</i> | 12099 | 0  | 102 | Yes | Yes | Household availability/<br>budget survey | Nationally representative |
| GDD 2010 | Russia Longitudinal Monitoring Study- Round 11-2002       | 2002 | 2002 | Russian Federation | <i>Information not reported</i> | 12484 | 0  | 103 | Yes | Yes | Household availability/<br>budget survey | Nationally representative |
| GDD 2010 | Russia Longitudinal Monitoring Study- Round 12-2003       | 2003 | 2003 | Russian Federation | <i>Information not reported</i> | 12628 | 0  | 101 | Yes | Yes | Household availability/<br>budget survey | Nationally representative |
| GDD 2010 | Russia Longitudinal Monitoring Study- Round 13-2004       | 2004 | 2004 | Russian Federation | <i>Information not reported</i> | 12632 | 0  | 102 | Yes | Yes | Household availability/<br>budget survey | Nationally representative |
| GDD 2010 | Russia Longitudinal Monitoring Study- Round 14-2005       | 2005 | 2005 | Russian Federation | <i>Information not reported</i> | 12217 | 0  | 103 | Yes | Yes | Household availability/<br>budget survey | Nationally representative |
| GDD 2010 | Russia Longitudinal Monitoring Study- Round 15-2006       | 2006 | 2006 | Russian Federation | <i>Information not reported</i> | 14690 | 0  | 100 | Yes | Yes | Household availability/<br>budget survey | Nationally representative |
| GDD 2010 | Russia Longitudinal Monitoring Study- Round 16-2007       | 2007 | 2007 | Russian Federation | <i>Information not reported</i> | 14518 | 0  | 97  | Yes | Yes | Household availability/<br>budget survey | Nationally representative |
| GDD 2010 | Russia Longitudinal Monitoring Study- Round 17-2008       | 2008 | 2008 | Russian Federation | <i>Information not reported</i> | 14028 | 0  | 96  | Yes | Yes | Household availability/<br>budget survey | Nationally representative |

|          |                                                          |      |      |                              |                                 |       |    |    |     |     |                              |                                      |
|----------|----------------------------------------------------------|------|------|------------------------------|---------------------------------|-------|----|----|-----|-----|------------------------------|--------------------------------------|
|          |                                                          |      |      |                              |                                 |       |    |    |     |     | <i>budget survey</i>         |                                      |
| GDD 2010 | INTERSALT, Moscow                                        | 1985 | 1987 | Russian Federation           | <i>Information not reported</i> | 24    | 20 | 59 | Yes | Yes | <i>Biomarker</i>             | <i>Sub-nationally representative</i> |
| GDD 2017 | Demographic and Health Survey Rwanda 2007                | 2007 | 2008 | Rwanda                       | <i>Both urban and rural</i>     | 11942 | 0  | 49 | Yes | Yes | <i>Biomarker</i>             | <i>Nationally representative</i>     |
| GDD 2017 | Demographic and Health Survey Rwanda 2010                | 2010 | 2011 | Rwanda                       | <i>Both urban and rural</i>     | 13514 | 0  | 49 | Yes | Yes | <i>DHS questionnaire</i>     | <i>Nationally representative</i>     |
| GDD 2017 | Demographic and Health Survey Rwanda 2014                | 2014 | 2015 | Rwanda                       | <i>Both urban and rural</i>     | 12628 | 0  | 49 | Yes | Yes | <i>DHS questionnaire</i>     | <i>Nationally representative</i>     |
| GDD 2017 | Demographic and Health Survey Rwanda 2005                | 2005 | 2005 | Rwanda                       | <i>Both urban and rural</i>     | 17735 | 0  | 95 | Yes | Yes | <i>DHS questionnaire</i>     | <i>Nationally representative</i>     |
| GDD 2017 | Global Student Based Student Health Survey 2011          | 2011 | 2011 | Saint Kitts and Nevis        | <i>Both urban and rural</i>     | 1717  | 11 | 16 | Yes | Yes | <i>FFQ</i>                   | <i>Nationally representative</i>     |
| GDD 2010 | Saint Kitts Chronic Disease Risk Factor Survey 2008      | 2007 | 2007 | Saint Kitts and Nevis        | <i>Information not reported</i> | 1000  | 25 | 64 | Yes | Yes | <i>FFQ</i>                   | <i>Sub-nationally representative</i> |
| GDD 2017 | Global Student Based Student Health Survey 2007          | 2007 | 2007 | Saint Lucia                  | <i>Both urban and rural</i>     | 1264  | 11 | 16 | Yes | Yes | <i>FFQ</i>                   | <i>Nationally representative</i>     |
| GDD 2010 | Cooper et al.                                            | 1991 | 1994 | Saint Lucia                  | <i>Information not reported</i> | 1089  | 25 | 74 | Yes | Yes | <i>Biomarker</i>             | <i>Sub-nationally representative</i> |
| GDD 2017 | Global Student Based Student Health Survey 2007          | 2007 | 2007 | Saint Vincent And Grenadines | <i>Both urban and rural</i>     | 1296  | 11 | 16 | Yes | Yes | <i>FFQ</i>                   | <i>Nationally representative</i>     |
| GDD 2017 | Global Student Based Student Health Survey 2011          | 2011 | 2011 | Samoa                        | <i>Both urban and rural</i>     | 2340  | 11 | 16 | Yes | Yes | <i>FFQ</i>                   | <i>Nationally representative</i>     |
| GDD 2010 | Western Samoa 1990 24 hr recall diet estimates           | 1991 | 1991 | Samoa                        | <i>Information not reported</i> | 250   | 25 | 55 | Yes | Yes | <i>Single 24-hour recall</i> | <i>Nationally representative</i>     |
| GDD 2010 | Samoa NCD Risk Factors STEPS Report                      | 2002 | 2002 | Samoa                        | <i>Information not reported</i> | 1000  | 25 | 64 | Yes | Yes | <i>FFQ</i>                   | <i>Nationally representative</i>     |
| GDD 2017 | Demographic and Health Survey Sao Tome and Principe 2008 | 2008 | 2009 | Sao Tome And Principe        | <i>Both urban and rural</i>     | 6589  | 0  | 59 | Yes | Yes | <i>DHS questionnaire</i>     | <i>Nationally representative</i>     |

|          |                                                                                                  |      |      |                       |                          |       |    |     |     |     |                                      |                           |
|----------|--------------------------------------------------------------------------------------------------|------|------|-----------------------|--------------------------|-------|----|-----|-----|-----|--------------------------------------|---------------------------|
| GDD 2010 | Sao Tomé et Príncipe Enquête STEPS 2009                                                          | 2009 | 2009 | Sao Tome And Principe | Information not reported | 1000  | 25 | 64  | Yes | Yes | FFQ                                  | Nationally representative |
| GDD 2017 | Premature biological aging in Saudi adults with Type 2 diabetes and the influence of endotoxemia | 2014 | 2015 | Saudi Arabia          | Only urban               | 185   | 19 | 68  | Yes | Yes | FFQ                                  | Locally representative    |
| GDD 2017 | Global Student Based Student Health Survey 2005                                                  | 2005 | 2005 | Senegal               | Both urban and rural     | 3101  | 11 | 16  | Yes | Yes | FFQ                                  | Nationally representative |
| GDD 2017 | World Health Survey 2003                                                                         | 2003 | 2003 | Senegal               | Both urban and rural     | 1989  | 17 | 99  | Yes | Yes | FFQ                                  | Nationally representative |
| GDD 2017 | Demographic and Health Survey Senegal 2005                                                       | 2005 | 2005 | Senegal               | Both urban and rural     | 14950 | 0  | 59  | Yes | Yes | DHS questionnaire                    | Nationally representative |
| GDD 2017 | Demographic and Health Survey Senegal 2008 MIS                                                   | 2008 | 2009 | Senegal               | Both urban and rural     | 9666  | 0  | 49  | Yes | Yes | Biomarker                            | Nationally representative |
| GDD 2017 | Demographic and Health Survey Senegal 2010                                                       | 2010 | 2011 | Senegal               | Both urban and rural     | 19060 | 0  | 59  | Yes | Yes | DHS questionnaire                    | Nationally representative |
| GDD 2017 | Demographic and Health Survey Senegal 2012                                                       | 2012 | 2013 | Senegal               | Both urban and rural     | 6241  | 0  | 4   | Yes | Yes | DHS questionnaire                    | Nationally representative |
| GDD 2017 | Demographic and Health Survey Senegal 2014                                                       | 2014 | 2014 | Senegal               | Both urban and rural     | 6305  | 0  | 4   | Yes | Yes | DHS questionnaire                    | Nationally representative |
| GDD 2017 | Demographic and Health Survey Senegal 2015                                                       | 2015 | 2015 | Senegal               | Both urban and rural     | 4290  | 0  | 4   | Yes | Yes | DHS questionnaire                    | Nationally representative |
| GDD 2017 | MGSD Gestational Diabetes in the Mediterranean Region                                            | 2010 | 2013 | Serbia                | Only rural               | 90    | 17 | 43  | No  | Yes | FFQ                                  | Locally representative    |
| GDD 2010 | Serbian Community Health and Nutrition Survey                                                    | 2003 | 2003 | Serbia                | Information not reported | 1000  | 0  | 100 | Yes | Yes | Household availability/budget survey | Nationally representative |
| GDD 2010 | Serbian Community Health and Nutrition Survey                                                    | 2004 | 2004 | Serbia                | Information not reported | 1000  | 0  | 100 | Yes | Yes | Household availability/budget survey | Nationally representative |
| GDD 2017 | Seychelles Heart Survey                                                                          | 2013 | 2015 | Seychelles            | Both urban and rural     | 1240  | 25 | 64  | Yes | Yes | FFQ                                  | Nationally representative |

|          |                                                                                        |      |      |              |                          |       |    |     |     |     |                                      |                           |
|----------|----------------------------------------------------------------------------------------|------|------|--------------|--------------------------|-------|----|-----|-----|-----|--------------------------------------|---------------------------|
| GDD 2017 | Global Student Based Student Health Survey 2007                                        | 2007 | 2007 | Seychelles   | Both urban and rural     | 1413  | 7  | 16  | Yes | Yes | FFQ                                  | Nationally representative |
| GDD 2010 | The Seychelles Heart Study 2004: main findings                                         | 2004 | 2004 | Seychelles   | Information not reported | 1000  | 25 | 64  | Yes | Yes | FFQ                                  | Nationally representative |
| GDD 2017 | Demographic and Health Survey Sierra Leone 2008                                        | 2008 | 2008 | Sierra Leone | Both urban and rural     | 12187 | 0  | 59  | Yes | Yes | DHS questionnaire                    | Nationally representative |
| GDD 2017 | Demographic and Health Survey Sierra Leone 2013                                        | 2013 | 2013 | Sierra Leone | Both urban and rural     | 22800 | 0  | 59  | Yes | Yes | DHS questionnaire                    | Nationally representative |
| GDD 2010 | The Prevalence of the Common Risk Factors of Non-Communicable Diseases in Sierra Leone | 2009 | 2009 | Sierra Leone | Information not reported | 1000  | 25 | 64  | Yes | Yes | FFQ                                  | Nationally representative |
| GDD 2010 | National Nutrition Survey 1998                                                         | 1998 | 1998 | Singapore    | Information not reported | 1000  | 20 | 69  | Yes | Yes | FFQ                                  | Nationally representative |
| GDD 2010 | National Nutrition Survey 2004                                                         | 2004 | 2004 | Singapore    | Information not reported | 1000  | 20 | 69  | Yes | Yes | FFQ                                  | Nationally representative |
| GDD 2017 | World Health Survey 2003                                                               | 2003 | 2003 | Slovakia     | Both urban and rural     | 1658  | 18 | 92  | Yes | Yes | FFQ                                  | Nationally representative |
| GDD 2017 | Health Behavior in School-Aged Children 1994                                           | 1993 | 1994 | Slovakia     | Both urban and rural     | 3374  | 11 | 17  | Yes | Yes | FFQ                                  | Nationally representative |
| GDD 2017 | Health Behavior in School-Aged Children 1998                                           | 1998 | 1998 | Slovakia     | Both urban and rural     | 3777  | 11 | 16  | Yes | Yes | FFQ                                  | Nationally representative |
| GDD 2017 | Health Behavior in School-Aged Children 2010                                           | 2010 | 2010 | Slovakia     | Both urban and rural     | 5201  | 11 | 15  | Yes | Yes | FFQ                                  | Nationally representative |
| GDD 2017 | Health Behavior in School-Aged Children 2006                                           | 2006 | 2006 | Slovakia     | Both urban and rural     | 3841  | 11 | 15  | Yes | Yes | FFQ                                  | Nationally representative |
| GDD 2010 | Slovakian Community Health and Nutrition Survey                                        | 1997 | 1997 | Slovakia     | Information not reported | 1000  | 0  | 100 | Yes | Yes | Household availability/budget survey | Nationally representative |
| GDD 2010 | Slovakian Community Health and Nutrition Survey                                        | 2000 | 2000 | Slovakia     | Information not reported | 1000  | 0  | 100 | Yes | Yes | Household availability/budget survey | Nationally representative |

|          |                                                                                                                      |      |      |                 |                                 |      |    |     |     |     |                                              |                                      |
|----------|----------------------------------------------------------------------------------------------------------------------|------|------|-----------------|---------------------------------|------|----|-----|-----|-----|----------------------------------------------|--------------------------------------|
| GDD 2010 | Slovakian Community Health and Nutrition Survey                                                                      | 2003 | 2003 | Slovakia        | <i>Information not reported</i> | 1000 | 0  | 100 | Yes | Yes | <i>Household availability/ budget survey</i> | <i>Nationally representative</i>     |
| GDD 2010 | Monitoring of the nutritional status of particular groups of adult population                                        | 2006 | 2006 | Slovakia        | <i>Information not reported</i> | 1000 | 19 | 54  | Yes | Yes | <i>Single 24-hour recall</i>                 | <i>Nationally representative</i>     |
| GDD 2017 | World Health Survey 2003                                                                                             | 2003 | 2003 | Slovenia        | <i>Both urban and rural</i>     | 565  | 18 | 91  | Yes | Yes | <i>FFQ</i>                                   | <i>Nationally representative</i>     |
| GDD 2017 | Health Behavior in School-Aged Children 2002                                                                         | 2001 | 2002 | Slovenia        | <i>Both urban and rural</i>     | 3915 | 11 | 17  | Yes | Yes | <i>FFQ</i>                                   | <i>Nationally representative</i>     |
| GDD 2017 | Health Behavior in School-Aged Children 2006                                                                         | 2006 | 2006 | Slovenia        | <i>Both urban and rural</i>     | 5100 | 11 | 15  | Yes | Yes | <i>FFQ</i>                                   | <i>Nationally representative</i>     |
| GDD 2017 | Health Behavior in School-Aged Children 2010                                                                         | 2010 | 2010 | Slovenia        | <i>Both urban and rural</i>     | 5413 | 11 | 15  | Yes | Yes | <i>FFQ</i>                                   | <i>Nationally representative</i>     |
| GDD 2010 | Slovenian Community Health and Nutrition Survey                                                                      | 1998 | 1998 | Slovenia        | <i>Information not reported</i> | 1000 | 0  | 100 | Yes | Yes | <i>Household availability/ budget survey</i> | <i>Nationally representative</i>     |
| GDD 2010 | Slovenian Community Health and Nutrition Survey                                                                      | 2000 | 2000 | Slovenia        | <i>Information not reported</i> | 1000 | 0  | 100 | Yes | Yes | <i>Household availability/ budget survey</i> | <i>Nationally representative</i>     |
| GDD 2010 | Slovenian Community Health and Nutrition Survey                                                                      | 2002 | 2002 | Slovenia        | <i>Information not reported</i> | 1000 | 0  | 100 | Yes | Yes | <i>Household availability/ budget survey</i> | <i>Nationally representative</i>     |
| GDD 2010 | Nutritional status of Slovenian adolescens                                                                           | 2003 | 2005 | Slovenia        | <i>Information not reported</i> | 1010 | 14 | 17  | Yes | Yes | <i>FFQ</i>                                   | <i>Nationally representative</i>     |
| GDD 2010 | Ribic et al.                                                                                                         | 2007 | 2007 | Slovenia        | <i>Information not reported</i> | 61   | 25 | 65  | Yes | Yes | <i>Biomarker</i>                             | <i>Nationally representative</i>     |
| GDD 2017 | Global Student Based Student Health Survey 2011                                                                      | 2011 | 2011 | Solomon Islands | <i>Both urban and rural</i>     | 1323 | 11 | 16  | Yes | Yes | <i>FFQ</i>                                   | <i>Nationally representative</i>     |
| GDD 2010 | Changing patterns of hypertension, diabetes and diet among Melanesians and Micronesians in the Solomon Islands.-1985 | 2005 | 2005 | Solomon Islands | <i>Information not reported</i> | 1000 | 15 | 64  | Yes | Yes | <i>FFQ</i>                                   | <i>Sub-nationally representative</i> |

|          |                                                                       |      |      |              |                          |      |    |     |     |     |                       |                               |
|----------|-----------------------------------------------------------------------|------|------|--------------|--------------------------|------|----|-----|-----|-----|-----------------------|-------------------------------|
| GDD 2017 | Transition and Health during Urbanisation of South Africans: Children | 2000 | 2001 | South Africa | Both urban and rural     | 1257 | 9  | 16  | Yes | Yes | Single 24-hour recall | Sub-nationally representative |
| GDD 2017 | Demographic and Health Survey South Africa 1998                       | 1998 | 1998 | South Africa | Both urban and rural     | 3716 | 0  | 4   | Yes | Yes | DHS questionnaire     | Nationally representative     |
| GDD 2017 | Study of Global Ageing and Adult Health                               | 2007 | 2013 | South Africa | Both urban and rural     | 4007 | 18 | 113 | Yes | Yes | FFQ                   | Nationally representative     |
| GDD 2017 | World Health Survey 2003                                              | 2003 | 2003 | South Africa | Both urban and rural     | 1992 | 18 | 89  | Yes | Yes | FFQ                   | Nationally representative     |
| GDD 2010 | Food and nutrient availability in South African Households            | 1995 | 1995 | South Africa | Information not reported | 1000 | 0  | 99  | Yes | Yes | FFQ                   | Nationally representative     |
| GDD 2010 | Charlton et al. (1 of 3)                                              | 2002 | 2002 | South Africa | Information not reported | 110  | 20 | 65  | Yes | Yes | Biomarker             | Locally representative        |
| GDD 2010 | Charlton et al. (2 of 3)                                              | 2002 | 2002 | South Africa | Information not reported | 112  | 20 | 65  | Yes | Yes | Biomarker             | Locally representative        |
| GDD 2010 | Charlton et al. (3 of 3)                                              | 2002 | 2002 | South Africa | Information not reported | 103  | 20 | 65  | Yes | Yes | Biomarker             | Locally representative        |
| GDD 2010 | Maseko et al.                                                         | 2003 | 2003 | South Africa | Information not reported | 291  | 21 | 72  | Yes | Yes | Biomarker             | Locally representative        |
| GDD 2010 | Barlow et al. (1 of 2)                                                | 1982 | 1982 | South Africa | Information not reported | 150  | 30 | 50  | Yes | No  | Biomarker             | Locally representative        |
| GDD 2010 | Barlow et al. (2 of 2)                                                | 1982 | 1982 | South Africa | Information not reported | 64   | 30 | 50  | Yes | No  | Biomarker             | Locally representative        |
| GDD 2010 | Charlton et al. (1 of 3)                                              | 2002 | 2002 | South Africa | Information not reported | 110  | 20 | 65  | Yes | Yes | Single 24-hour recall | Locally representative        |
| GDD 2010 | Charlton et al. (2 of 3)                                              | 2002 | 2002 | South Africa | Information not reported | 112  | 20 | 65  | Yes | Yes | Single 24-hour recall | Locally representative        |
| GDD 2010 | Charlton et al. (3 of 3)                                              | 2002 | 2002 | South Africa | Information not reported | 103  | 20 | 65  | Yes | Yes | Single 24-hour recall | Locally representative        |
| GDD 2017 | World Health Survey 2003                                              | 2003 | 2003 | Spain        | Both urban and rural     | 5730 | 18 | 101 | Yes | Yes | FFQ                   | Nationally representative     |
| GDD 2017 | Health Behavior in School-Aged Children 1994                          | 1993 | 1994 | Spain        | Both urban and rural     | 4570 | 11 | 16  | Yes | Yes | FFQ                   | Nationally representative     |
| GDD 2017 | Health Behavior in School-Aged Children 2002                          | 2001 | 2002 | Spain        | Both urban and rural     | 5823 | 11 | 16  | Yes | Yes | FFQ                   | Nationally representative     |
| GDD 2017 | Health Behavior in School-Aged Children 2006                          | 2005 | 2006 | Spain        | Both urban and rural     | 8874 | 11 | 15  | Yes | Yes | FFQ                   | Nationally representative     |
| GDD 2017 | Health Behavior in School-Aged Children 2010                          | 2009 | 2010 | Spain        | Both urban and rural     | 5030 | 11 | 15  | Yes | Yes | FFQ                   | Nationally representative     |

|          |                                                                                                                                            |      |      |           |                                 |      |    |     |     |     |                                                  |                                      |
|----------|--------------------------------------------------------------------------------------------------------------------------------------------|------|------|-----------|---------------------------------|------|----|-----|-----|-----|--------------------------------------------------|--------------------------------------|
| GDD 2010 | Spanish Community Health and Nutrition Survey                                                                                              | 1980 | 1981 | Spain     | <i>Information not reported</i> | 1000 | 0  | 100 | Yes | Yes | <i>Household availability/<br/>budget survey</i> | <i>Nationally representative</i>     |
| GDD 2010 | Spanish Community Health and Nutrition Survey                                                                                              | 1990 | 1991 | Spain     | <i>Information not reported</i> | 1000 | 0  | 100 | Yes | Yes | <i>Household availability/<br/>budget survey</i> | <i>Nationally representative</i>     |
| GDD 2010 | Spanish Community Health and Nutrition Survey                                                                                              | 1998 | 1999 | Spain     | <i>Information not reported</i> | 1000 | 0  | 100 | Yes | Yes | <i>Household availability/<br/>budget survey</i> | <i>Nationally representative</i>     |
| GDD 2010 | The Catalan Nutrition Survey (ENCAT 2002-2003) and Serra Majem and Ribas, 2007 and Serra-Majem L et al., 2007 and Serra Majem et al., 2006 | 2003 | 2003 | Spain     | <i>Information not reported</i> | 1000 | 10 | 100 | Yes | Yes | <i>Multiple 24-<br/>hour recall</i>              | <i>Nationally representative</i>     |
| GDD 2010 | TRANSFAIR study                                                                                                                            | 1991 | 1991 | Spain     | <i>Information not reported</i> | 1000 | 0  | 100 | Yes | Yes | <i>Household availability/<br/>budget survey</i> | <i>Nationally representative</i>     |
| GDD 2010 | INTERSALT, Manresa                                                                                                                         | 1985 | 1987 | Spain     | <i>Information not reported</i> | 25   | 20 | 59  | Yes | Yes | <i>Biomarker</i>                                 | <i>Sub-nationally representative</i> |
| GDD 2010 | INTERSALT, Torrejon,                                                                                                                       | 1985 | 1987 | Spain     | <i>Information not reported</i> | 25   | 20 | 59  | Yes | Yes | <i>Biomarker</i>                                 | <i>Sub-nationally representative</i> |
| GDD 2010 | Schroder et al.                                                                                                                            | 1994 | 1996 | Spain     | <i>Information not reported</i> | 1567 | 25 | 54  | Yes | Yes | <i>Multiple 24-<br/>hour recall</i>              | <i>Sub-nationally representative</i> |
| GDD 2010 | Ortega et al.                                                                                                                              | 2009 | 2009 | Spain     | <i>Information not reported</i> | 196  | 20 | 60  | Yes | Yes | <i>Biomarker</i>                                 | <i>Nationally representative</i>     |
| GDD 2017 | Lifestyle patterns and dysglycaemic risk in urban Sri Lankan women                                                                         | 2010 | 2012 | Sri Lanka | <i>Only urban</i>               | 617  | 30 | 45  | No  | Yes | <i>FFQ</i>                                       | <i>Locally representative</i>        |
| GDD 2017 | Nutrition Survey -DRU                                                                                                                      | 2003 | 2006 | Sri Lanka | <i>Both urban and rural</i>     | 488  | 18 | 89  | Yes | Yes | <i>Single 24-<br/>hour recall</i>                | <i>Nationally representative</i>     |
| GDD 2017 | Global Student Based Student Health Survey 2008                                                                                            | 2008 | 2008 | Sri Lanka | <i>Both urban and rural</i>     | 2581 | 11 | 16  | Yes | Yes | <i>FFQ</i>                                       | <i>Nationally representative</i>     |
| GDD 2017 | World Health Survey 2003                                                                                                                   | 2003 | 2003 | Sri Lanka | <i>Both urban and rural</i>     | 6805 | 18 | 100 | Yes | Yes | <i>FFQ</i>                                       | <i>Nationally representative</i>     |

|          |                                                                                                                                                                                                                                                    |      |      |           |                                 |       |    |    |     |     |                                |                                      |
|----------|----------------------------------------------------------------------------------------------------------------------------------------------------------------------------------------------------------------------------------------------------|------|------|-----------|---------------------------------|-------|----|----|-----|-----|--------------------------------|--------------------------------------|
| GDD 2010 | Abdominal obesity and its association with selected risk factors of coronary heart disease in an adult population in the district of Colombo; MD Thesis (Community Medicine), Postgraduate Institute of Medicine, University of Colombo, Sri Lanka | 2004 | 2004 | Sri Lanka | <i>Information not reported</i> | 1000  | 20 | 64 | Yes | Yes | FFQ                            | <i>Sub-nationally representative</i> |
| GDD 2010 | Sri Lanka Global School-Based Student Health Survey (GSHS)-2007                                                                                                                                                                                    | 2006 | 2006 | Sri Lanka | <i>Information not reported</i> | 1000  | 15 | 64 | Yes | Yes | FFQ                            | <i>Nationally representative</i>     |
| GDD 2017 | Global Student Based Student Health Survey 2012                                                                                                                                                                                                    | 2012 | 2012 | Sudan     | <i>Both urban and rural</i>     | 2115  | 11 | 16 | Yes | Yes | FFQ                            | <i>Nationally representative</i>     |
| GDD 2017 | Demographic and Health Survey Sudan 1989                                                                                                                                                                                                           | 1989 | 1990 | Sudan     | <i>Both urban and rural</i>     | 2145  | 0  | 4  | Yes | Yes | <i>DHS questionnaire</i>       | <i>Nationally representative</i>     |
| GDD 2017 | Global Student Based Student Health Survey 2009                                                                                                                                                                                                    | 2009 | 2009 | Suriname  | <i>Both urban and rural</i>     | 1677  | 11 | 16 | Yes | Yes | FFQ                            | <i>Nationally representative</i>     |
| GDD 2017 | Global Student Based Student Health Survey 2003                                                                                                                                                                                                    | 2003 | 2003 | Swaziland | <i>Both urban and rural</i>     | 6771  | 11 | 16 | Yes | Yes | FFQ                            | <i>Nationally representative</i>     |
| GDD 2017 | Global Student Based Student Health Survey 2013                                                                                                                                                                                                    | 2013 | 2013 | Swaziland | <i>Both urban and rural</i>     | 3616  | 7  | 16 | Yes | Yes | FFQ                            | <i>Nationally representative</i>     |
| GDD 2017 | World Health Survey 2003                                                                                                                                                                                                                           | 2003 | 2003 | Swaziland | <i>Both urban and rural</i>     | 3070  | 18 | 98 | Yes | Yes | FFQ                            | <i>Nationally representative</i>     |
| GDD 2017 | Demographic and Health Survey Swaziland 2006                                                                                                                                                                                                       | 2006 | 2007 | Swaziland | <i>Both urban and rural</i>     | 10641 | 0  | 49 | Yes | Yes | <i>DHS questionnaire</i>       | <i>Nationally representative</i>     |
| GDD 2017 | Swedish National Dietary Survey-Riksmaten 2010-11                                                                                                                                                                                                  | 2010 | 2011 | Sweden    | <i>Both urban and rural</i>     | 1797  | 18 | 80 | Yes | Yes | <i>Multiple 24-hour recall</i> | <i>Nationally representative</i>     |
| GDD 2017 | Health Behavior in School-Aged Children 1986                                                                                                                                                                                                       | 1985 | 1986 | Sweden    | <i>Both urban and rural</i>     | 2933  | 11 | 15 | Yes | Yes | FFQ                            | <i>Nationally representative</i>     |
| GDD 2017 | Health Behavior in School-Aged Children 1990                                                                                                                                                                                                       | 1989 | 1990 | Sweden    | <i>Both urban and rural</i>     | 3474  | 11 | 16 | Yes | Yes | FFQ                            | <i>Nationally representative</i>     |



|          |                                                           |      |      |             |                          |      |    |     |     |     |                                      |                               |
|----------|-----------------------------------------------------------|------|------|-------------|--------------------------|------|----|-----|-----|-----|--------------------------------------|-------------------------------|
| GDD 2017 | Health Behavior in School-Aged Children 1994              | 1993 | 1994 | Sweden      | Both urban and rural     | 3552 | 11 | 17  | Yes | Yes | FFQ                                  | Nationally representative     |
| GDD 2017 | Health Behavior in School-Aged Children 1998              | 1997 | 1998 | Sweden      | Both urban and rural     | 3767 | 11 | 16  | Yes | Yes | FFQ                                  | Nationally representative     |
| GDD 2017 | Health Behavior in School-Aged Children 2002              | 2001 | 2002 | Sweden      | Both urban and rural     | 3896 | 11 | 16  | Yes | Yes | FFQ                                  | Nationally representative     |
| GDD 2017 | Health Behavior in School-Aged Children 2006              | 2005 | 2006 | Sweden      | Both urban and rural     | 4364 | 11 | 15  | Yes | Yes | FFQ                                  | Nationally representative     |
| GDD 2017 | Health Behavior in School-Aged Children 2010              | 2009 | 2010 | Sweden      | Both urban and rural     | 6582 | 11 | 15  | Yes | Yes | FFQ                                  | Nationally representative     |
| GDD 2010 | Dietary habits and nutrient intake in Sweden 1989         | 1989 | 1989 | Sweden      | Information not reported | 1000 | 18 | 74  | Yes | Yes | Single 24-hour recall                | Nationally representative     |
| GDD 2010 | Swedish Community Health and Nutrition Survey             | 1989 | 1989 | Sweden      | Information not reported | 1000 | 0  | 100 | Yes | Yes | Household availability/budget survey | Nationally representative     |
| GDD 2010 | Swedish Community Health and Nutrition Survey             | 1996 | 1996 | Sweden      | Information not reported | 1000 | 18 | 74  | Yes | Yes | Household availability/budget survey | Nationally representative     |
| GDD 2010 | Dietary habits and nutrient intake in Sweden 1997-98      | 1997 | 1998 | Sweden      | Information not reported | 1000 | 17 | 79  | Yes | Yes | Single 24-hour recall                | Nationally representative     |
| GDD 2010 | Dietary habits and nutrient intake in Sweden 1997-98      | 1997 | 1998 | Sweden      | Information not reported | 1000 | 19 | 100 | Yes | Yes | Single 24-hour recall                | Nationally representative     |
| GDD 2010 | Dietary habits and nutrient intake among Swedish children | 2003 | 2003 | Sweden      | Information not reported | 1000 | 4  | 11  | Yes | Yes | Single 24-hour recall                | Nationally representative     |
| GDD 2010 | TRANSFAIR study                                           | 1989 | 1989 | Sweden      | Information not reported | 500  | 19 | 64  | Yes | Yes | Single 24-hour recall                | Nationally representative     |
| GDD 2017 | Bus Santé                                                 | 1994 | 2012 | Switzerland | Both urban and rural     | 4842 | 35 | 75  | Yes | Yes | FFQ                                  | Sub-nationally representative |
| GDD 2017 | CoLaus                                                    | 2009 | 2012 | Switzerland | Only urban               | 4249 | 35 | 75  | Yes | Yes | FFQ                                  | Locally representative        |
| GDD 2017 | Health Behavior in School-Aged Children 1986              | 1985 | 1986 | Switzerland | Both urban and rural     | 4804 | 11 | 17  | Yes | Yes | FFQ                                  | Nationally representative     |

|          |                                                  |      |      |                      |                          |       |    |     |     |     |                       |                               |
|----------|--------------------------------------------------|------|------|----------------------|--------------------------|-------|----|-----|-----|-----|-----------------------|-------------------------------|
| GDD 2017 | Health Behavior in School-Aged Children 1998     | 1997 | 1998 | Switzerland          | Both urban and rural     | 5520  | 11 | 16  | Yes | Yes | FFQ                   | Nationally representative     |
| GDD 2017 | Health Behavior in School-Aged Children 2002     | 2001 | 2002 | Switzerland          | Both urban and rural     | 4528  | 11 | 17  | Yes | Yes | FFQ                   | Nationally representative     |
| GDD 2017 | Health Behavior in School-Aged Children 2006     | 2005 | 2006 | Switzerland          | Both urban and rural     | 4553  | 11 | 15  | Yes | Yes | FFQ                   | Nationally representative     |
| GDD 2017 | Health Behavior in School-Aged Children 2010     | 2009 | 2010 | Switzerland          | Both urban and rural     | 6598  | 11 | 15  | Yes | Yes | FFQ                   | Nationally representative     |
| GDD 2010 | Etude Bus Santé                                  | 2004 | 2009 | Switzerland          | Information not reported | 1000  | 35 | 74  | Yes | Yes | FFQ                   | Locally representative        |
| GDD 2010 | Chappuis et al.                                  | 2010 | 2011 | Switzerland          | Information not reported | 154   | 20 | 79  | Yes | Yes | Biomarker             | Nationally representative     |
| GDD 2017 | Global Student Based Student Health Survey 2011  | 2011 | 2011 | Syrian Arab Republic | Both urban and rural     | 3089  | 11 | 16  | Yes | Yes | FFQ                   | Nationally representative     |
| GDD 2017 | Global Student Based Student Health Survey 2010  | 2010 | 2010 | Syrian Arab Republic | Both urban and rural     | 2085  | 11 | 16  | Yes | Yes | FFQ                   | Nationally representative     |
| GDD 2010 | 2005-2008 Nutrition and Health Survey in Taiwan  | 2005 | 2008 | Taiwan               | Information not reported | 1000  | 19 | 100 | Yes | Yes | Single 24-hour recall | Nationally representative     |
| GDD 2010 | INTERSALT, San Chilo Village                     | 1985 | 1987 | Taiwan               | Information not reported | 22    | 20 | 59  | Yes | Yes | Biomarker             | Sub-nationally representative |
| GDD 2017 | Demographic and Health Survey Tajikistan 2012    | 2012 | 2012 | Tajikistan           | Both urban and rural     | 2960  | 0  | 4   | Yes | Yes | DHS questionnaire     | Nationally representative     |
| GDD 2017 | Demographic and Health Survey Tanzania 2004-2005 | 2004 | 2005 | Tanzania             | Both urban and rural     | 17743 | 0  | 49  | Yes | Yes | DHS questionnaire     | Nationally representative     |
| GDD 2017 | Demographic and Health Survey Tanzania 2010      | 2010 | 2010 | Tanzania             | Both urban and rural     | 17379 | 0  | 49  | Yes | Yes | DHS questionnaire     | Nationally representative     |
| GDD 2017 | Global Student Based Student Health Survey 2006  | 2006 | 2006 | Tanzania             | Only urban               | 2125  | 11 | 16  | Yes | Yes | FFQ                   | Locally representative        |
| GDD 2017 | Demographic and Health Survey Tanzania 1999      | 1999 | 1999 | Tanzania             | Both urban and rural     | 1849  | 0  | 4   | Yes | Yes | DHS questionnaire     | Nationally representative     |

|          |                                                                                                                                                      |      |      |             |                          |       |    |     |     |     |                         |                               |
|----------|------------------------------------------------------------------------------------------------------------------------------------------------------|------|------|-------------|--------------------------|-------|----|-----|-----|-----|-------------------------|-------------------------------|
| GDD 2017 | Demographic and Health Survey United Republic of Tanzania 2015                                                                                       | 2015 | 2016 | Tanzania    | Both urban and rural     | 22434 | 0  | 49  | Yes | Yes | DHS questionnaire       | Nationally representative     |
| GDD 2010 | Pavan et al. (2 of 4)                                                                                                                                | 1994 | 1994 | Tanzania    | Information not reported | 232   | 22 | 85  | Yes | Yes | FFQ                     | Sub-nationally representative |
| GDD 2017 | Calcium and bone status in Thais                                                                                                                     | 2010 | 2011 | Thailand    | Only urban               | 845   | 11 | 88  | Yes | Yes | Single 24-hour recall   | Locally representative        |
| GDD 2017 | SEANUTS: South East Asian Nutrition Surveys                                                                                                          | 2010 | 2011 | Thailand    | Both urban and rural     | 3105  | 0  | 12  | Yes | Yes | Single 24-hour recall   | Nationally representative     |
| GDD 2017 | Food Consumption Survey                                                                                                                              | 2004 | 2005 | Thailand    | Both urban and rural     | 7309  | 18 | 103 | Yes | Yes | FFQ                     | Nationally representative     |
| GDD 2017 | Global Student Based Student Health Survey 2008                                                                                                      | 2008 | 2008 | Thailand    | Both urban and rural     | 2758  | 11 | 16  | Yes | Yes | FFQ                     | Nationally representative     |
| GDD 2010 | Calcium Status, Factors Affecting Calcium and Bone Status in Healthy Thais Living in Bangkok                                                         | 1993 | 1993 | Thailand    | Information not reported | 250   | 20 | 80  | Yes | Yes | Single 24-hour recall   | Locally representative        |
| GDD 2010 | The 4th National Food and Nutrition Survey, Thailand                                                                                                 | 1995 | 1995 | Thailand    | Information not reported | 1000  | 0  | 50  | Yes | Yes | FFQ                     | Nationally representative     |
| GDD 2010 | National Food and Nutrition Survey, Thailand                                                                                                         | 2003 | 2003 | Thailand    | Information not reported | 1000  | 15 | 74  | Yes | Yes | Single 24-hour recall   | Nationally representative     |
| GDD 2010 | Fruit and vegetable consumption and its recommended intake associated with sociodemographic factors: Thailand National Health Examination Survey III | 2004 | 2004 | Thailand    | Information not reported | 1000  | 15 | 100 | Yes | Yes | FFQ                     | Nationally representative     |
| GDD 2010 | Activity, dietary intake, and anthropometry of an informal social group of Thai elderly in Bangkok                                                   |      | 2000 | Thailand    | Information not reported | 250   | 60 | 94  | Yes | Yes | Multiple 24-hour recall | Locally representative        |
| GDD 2010 | Kwanmaung et al. (1 of 2)                                                                                                                            | 1998 | 1998 | Thailand    | Information not reported | 18    | 20 | 79  | Yes | Yes | Biomarker               | Locally representative        |
| GDD 2017 | Demographic and Health Survey Timor-Leste 2009                                                                                                       | 2010 | 2010 | Timor-Leste | Both urban and rural     | 15615 | 0  | 49  | Yes | Yes | DHS questionnaire       | Nationally representative     |
| GDD 2017 | Demographic and Health Survey Togo 2013                                                                                                              | 2013 | 2014 | Togo        | Both urban and rural     | 14505 | 0  | 59  | Yes | Yes | DHS questionnaire       | Nationally representative     |

|          |                                                                                                                |      |      |                     |                                 |      |    |     |     |     |                  |                                      |
|----------|----------------------------------------------------------------------------------------------------------------|------|------|---------------------|---------------------------------|------|----|-----|-----|-----|------------------|--------------------------------------|
| GDD 2010 | Tokelau STEPS Survey 2005                                                                                      | 2005 | 2005 | Tokelau             | <i>Information not reported</i> | 500  | 15 | 64  | Yes | Yes | FFQ              | <i>Nationally representative</i>     |
| GDD 2017 | Global Student Based Student Health Survey 2010                                                                | 2010 | 2010 | Tonga               | <i>Both urban and rural</i>     | 2186 | 11 | 16  | Yes | Yes | FFQ              | <i>Nationally representative</i>     |
| GDD 2010 | Tonga STEPS Survey 2004 Fact Sheet                                                                             | 2004 | 2004 | Tonga               | <i>Information not reported</i> | 500  | 15 | 64  | Yes | Yes | FFQ              | <i>Nationally representative</i>     |
| GDD 2017 | Food insecurity, food choices, and body mass index in adults: nutrition transition in Trinidad and Tobago 2002 | 2002 | 2002 | Trinidad And Tobago | <i>Both urban and rural</i>     | 545  | 24 | 89  | Yes | Yes | FFQ              | <i>Sub-nationally representative</i> |
| GDD 2017 | National Survey of Senior School Health                                                                        | 2003 | 2003 | Trinidad And Tobago | <i>Both urban and rural</i>     | 1973 | 15 | 17  | Yes | Yes | FFQ              | <i>Nationally representative</i>     |
| GDD 2017 | National Health Survey of Primary School Children                                                              | 2003 | 2003 | Trinidad And Tobago | <i>Both urban and rural</i>     | 3891 | 4  | 10  | Yes | Yes | FFQ              | <i>Nationally representative</i>     |
| GDD 2017 | Food Consumption Patterns among Seventh-day Adventists Congregants in Trinidad and Tobago                      | 2013 | 2014 | Trinidad And Tobago | <i>Both urban and rural</i>     | 187  | 0  | 6   | Yes | Yes | FFQ              | <i>Locally representative</i>        |
| GDD 2017 | Global Student Based Student Health Survey 2007                                                                | 2007 | 2007 | Trinidad And Tobago | <i>Both urban and rural</i>     | 2913 | 11 | 16  | Yes | Yes | FFQ              | <i>Nationally representative</i>     |
| GDD 2017 | Global Student Based Student Health Survey 2011                                                                | 2011 | 2011 | Trinidad And Tobago | <i>Both urban and rural</i>     | 2773 | 11 | 16  | Yes | Yes | FFQ              | <i>Nationally representative</i>     |
| GDD 2010 | Food insecurity, food choices, and body mass index in adults: nutrition transition in Trinidad and Tobago      | 2001 | 2001 | Trinidad And Tobago | <i>Information not reported</i> | 500  | 25 | 100 | Yes | Yes | FFQ              | <i>Nationally representative</i>     |
| GDD 2010 | INTERSALT, Plymoth-Bethesda                                                                                    | 1985 | 1987 | Trinidad And Tobago | <i>Information not reported</i> | 21   | 20 | 59  | Yes | Yes | <i>Biomarker</i> | <i>Sub-nationally representative</i> |
| GDD 2017 | MGSD Gestational Diabetes in the Mediterranean Region                                                          | 2010 | 2013 | Tunisia             | <i>Only rural</i>               | 92   | 21 | 42  | No  | Yes | FFQ              | <i>Locally representative</i>        |
| GDD 2017 | Tunisian Scholar Children Food Consumption Survey                                                              | 2006 | 2006 | Tunisia             | <i>Both urban and rural</i>     | 715  | 5  | 8   | Yes | Yes | FFQ              | <i>Sub-nationally representative</i> |
| GDD 2017 | Global Student Based Student Health Survey 2008                                                                | 2008 | 2008 | Tunisia             | <i>Both urban and rural</i>     | 2808 | 11 | 16  | Yes | Yes | FFQ              | <i>Nationally representative</i>     |
| GDD 2017 | World Health Survey 2003                                                                                       | 2003 | 2003 | Tunisia             | <i>Both urban and rural</i>     | 4697 | 18 | 100 | Yes | Yes | FFQ              | <i>Nationally representative</i>     |

|          |                                                                                                         |      |      |         |                          |       |    |    |     |     |                         |                               |
|----------|---------------------------------------------------------------------------------------------------------|------|------|---------|--------------------------|-------|----|----|-----|-----|-------------------------|-------------------------------|
| GDD 2017 | Salt Consumption Study in Turkey                                                                        | 2012 | 2012 | Turkey  | Both urban and rural     | 657   | 18 | 90 | Yes | Yes | Single 24-hour recall   | Nationally representative     |
| GDD 2017 | Determination of dietary habits as a risk factor of cardiovascular heart disease in Turkish adolescents | 2003 | 2004 | Turkey  | Only urban               | 300   | 12 | 19 | Yes | Yes | Multiple 24-hour recall | Locally representative        |
| GDD 2017 | World Health Survey 2003                                                                                | 2003 | 2003 | Turkey  | Both urban and rural     | 10562 | 18 | 89 | Yes | Yes | FFQ                     | Nationally representative     |
| GDD 2017 | Health Behavior in School-Aged Children 2006                                                            | 2005 | 2006 | Turkey  | Both urban and rural     | 5477  | 11 | 15 | Yes | Yes | FFQ                     | Nationally representative     |
| GDD 2017 | Health Behavior in School-Aged Children 2010                                                            | 2009 | 2010 | Turkey  | Both urban and rural     | 5559  | 11 | 15 | Yes | Yes | FFQ                     | Nationally representative     |
| GDD 2010 | Dietary intake of adult population living in Ankara                                                     | 2005 | 2005 | Turkey  | Information not reported | 1000  | 20 | 84 | Yes | Yes | Single 24-hour recall   | Locally representative        |
| GDD 2010 | Erdem et al.                                                                                            | 2007 | 2007 | Turkey  | Information not reported | 373   | 20 | 94 | Yes | Yes | Biomarker               | Nationally representative     |
| GDD 2017 | Global Student Based Student Health Survey 2013                                                         | 2013 | 2013 | Tuvalu  | Both urban and rural     | 906   | 11 | 16 | Yes | Yes | FFQ                     | Nationally representative     |
| GDD 2017 | Demographic and Health Survey Uganda 2001                                                               | 2000 | 2001 | Uganda  | Both urban and rural     | 14053 | 0  | 54 | Yes | Yes | DHS questionnaire       | Nationally representative     |
| GDD 2017 | Demographic and Health Survey Uganda 2006                                                               | 2006 | 2006 | Uganda  | Both urban and rural     | 12205 | 0  | 49 | Yes | Yes | DHS questionnaire       | Nationally representative     |
| GDD 2017 | Demographic and Health Survey Uganda 2011                                                               | 2011 | 2011 | Uganda  | Both urban and rural     | 8190  | 0  | 49 | Yes | Yes | DHS questionnaire       | Nationally representative     |
| GDD 2017 | Global Student Based Student Health Survey 2003                                                         | 2003 | 2003 | Uganda  | Both urban and rural     | 3048  | 11 | 16 | Yes | Yes | FFQ                     | Nationally representative     |
| GDD 2017 | DHS VII MIS                                                                                             | 2014 | 2015 | Uganda  | Both urban and rural     | 9122  | 0  | 95 | Yes | Yes | DHS questionnaire       | Nationally representative     |
| GDD 2017 | DHS VII                                                                                                 | 2016 | 2016 | Uganda  | Both urban and rural     | 23238 | 0  | 98 | Yes | Yes | DHS questionnaire       | Nationally representative     |
| GDD 2010 | Pavan et al.(3 of 4)                                                                                    | 1994 | 1994 | Uganda  | Information not reported | 138   | 22 | 89 | Yes | Yes | FFQ                     | Sub-nationally representative |
| GDD 2017 | World Health Survey 2003                                                                                | 2003 | 2003 | Ukraine | Both urban and rural     | 2811  | 18 | 94 | Yes | Yes | FFQ                     | Nationally representative     |

|          |                                                                         |      |      |                      |                          |       |    |    |     |     |                       |                               |
|----------|-------------------------------------------------------------------------|------|------|----------------------|--------------------------|-------|----|----|-----|-----|-----------------------|-------------------------------|
| GDD 2017 | Health Behavior in School-Aged Children 2002                            | 2001 | 2002 | Ukraine              | Both urban and rural     | 4090  | 11 | 17 | Yes | Yes | FFQ                   | Nationally representative     |
| GDD 2017 | Health Behavior in School-Aged Children 2006                            | 2005 | 2006 | Ukraine              | Both urban and rural     | 5040  | 11 | 15 | Yes | Yes | FFQ                   | Nationally representative     |
| GDD 2017 | Health Behavior in School-Aged Children 2010                            | 2009 | 2010 | Ukraine              | Both urban and rural     | 5837  | 11 | 15 | Yes | Yes | FFQ                   | Nationally representative     |
| GDD 2017 | Demographic and Health Survey Ukraine 2007                              | 2007 | 2007 | Ukraine              | Both urban and rural     | 762   | 0  | 4  | Yes | Yes | DHS questionnaire     | Nationally representative     |
| GDD 2010 | Living Conditions Lifestyles and Health                                 | 2001 | 2002 | Ukraine              | Information not reported | 1000  | 18 | 99 | Yes | Yes | FFQ                   | Nationally representative     |
| GDD 2017 | United Arab Emirate- Indoor Air, Health and Nutrition (UAE-IAHN) Survey | 2009 | 2010 | United Arab Emirates | Both urban and rural     | 1011  | 6  | 50 | Yes | Yes | Single 24-hour recall | Nationally representative     |
| GDD 2017 | Global Student Based Student Health Survey 2005                         | 2005 | 2005 | United Arab Emirates | Both urban and rural     | 15453 | 11 | 16 | Yes | Yes | FFQ                   | Nationally representative     |
| GDD 2017 | World Health Survey 2003                                                | 2003 | 2003 | United Arab Emirates | Both urban and rural     | 1183  | 18 | 90 | Yes | Yes | FFQ                   | Nationally representative     |
| GDD 2017 | Global Student Based Student Health Survey 2010                         | 2010 | 2010 | United Arab Emirates | Both urban and rural     | 2547  | 11 | 16 | Yes | Yes | FFQ                   | Nationally representative     |
| GDD 2017 | Nutrition in African Population                                         | 1993 | 1996 | United Kingdom       | Only urban               | 246   | 25 | 72 | Yes | Yes | FFQ                   | Locally representative        |
| GDD 2017 | Health Behavior in School-Aged Children 2002                            | 2001 | 2002 | United Kingdom       | Both urban and rural     | 14314 | 11 | 17 | Yes | Yes | FFQ                   | Sub-nationally representative |
| GDD 2017 | Health Behavior in School-Aged Children 2006                            | 2005 | 2006 | United Kingdom       | Both urban and rural     | 15257 | 11 | 15 | Yes | Yes | FFQ                   | Nationally representative     |
| GDD 2017 | Health Behavior in School-Aged Children 2010                            | 2009 | 2010 | United Kingdom       | Both urban and rural     | 15578 | 11 | 15 | Yes | Yes | FFQ                   | Nationally representative     |
| GDD 2017 | Health Behavior in School-Aged Children 1986                            | 1985 | 1986 | United Kingdom       | Both urban and rural     | 4760  | 11 | 15 | Yes | Yes | FFQ                   | Nationally representative     |
| GDD 2017 | Health Behavior in School-Aged Children 1990                            | 1989 | 1990 | United Kingdom       | Both urban and rural     | 6712  | 11 | 17 | Yes | Yes | FFQ                   | Sub-nationally representative |

|          |                                                                   |      |      |                |                          |      |    |     |     |     |                         |                               |
|----------|-------------------------------------------------------------------|------|------|----------------|--------------------------|------|----|-----|-----|-----|-------------------------|-------------------------------|
| GDD 2017 | Health Behavior in School-Aged Children 1994                      | 1993 | 1994 | United Kingdom | Both urban and rural     | 3950 | 11 | 17  | Yes | Yes | FFQ                     | Sub-nationally representative |
| GDD 2017 | Health Behavior in School-Aged Children 1994                      | 1993 | 1994 | United Kingdom | Both urban and rural     | 4924 | 11 | 17  | Yes | Yes | FFQ                     | Sub-nationally representative |
| GDD 2017 | Health Behavior in School-Aged Children 1994                      | 1993 | 1994 | United Kingdom | Both urban and rural     | 3855 | 11 | 17  | Yes | Yes | FFQ                     | Sub-nationally representative |
| GDD 2017 | Health Behavior in School-Aged Children 1998                      | 1997 | 1998 | United Kingdom | Both urban and rural     | 6344 | 11 | 17  | Yes | Yes | FFQ                     | Sub-nationally representative |
| GDD 2017 | Health Behavior in School-Aged Children 1998                      | 1997 | 1998 | United Kingdom | Both urban and rural     | 3346 | 11 | 16  | Yes | Yes | FFQ                     | Sub-nationally representative |
| GDD 2017 | Health Behavior in School-Aged Children 1998                      | 1997 | 1998 | United Kingdom | Both urban and rural     | 5588 | 11 | 17  | Yes | Yes | FFQ                     | Sub-nationally representative |
| GDD 2017 | Health Behavior in School-Aged Children 1998                      | 1997 | 1998 | United Kingdom | Both urban and rural     | 4516 | 11 | 17  | Yes | Yes | FFQ                     | Sub-nationally representative |
| GDD 2010 | Dietary and Nutritional Survey of British Adults                  | 1986 | 1987 | United Kingdom | Information not reported | 1000 | 16 | 64  | Yes | Yes | Single 24-hour recall   | Nationally representative     |
| GDD 2010 | National British Diet & Nutrition Survey                          | 1986 | 1987 | United Kingdom | Information not reported | 102  | 20 | 64  | Yes | Yes | Biomarker               | Nationally representative     |
| GDD 2010 | National Diet and Nutrition Survey: children aged 1-4 years       | 1992 | 1993 | United Kingdom | Information not reported | 1000 | 2  | 5   | Yes | Yes | Single 24-hour recall   | Nationally representative     |
| GDD 2010 | National Diet and Nutrition Survey: people aged 65 years and over | 1994 | 1995 | United Kingdom | Information not reported | 1000 | 65 | 100 | Yes | Yes | Single 24-hour recall   | Nationally representative     |
| GDD 2010 | National Diet and Nutrition Survey: young people 4-18 years       | 1997 | 1997 | United Kingdom | Information not reported | 1000 | 4  | 18  | Yes | Yes | Single 24-hour recall   | Nationally representative     |
| GDD 2010 | National Diet and Nutrition Survey: adults aged 19-64 years       | 2000 | 2001 | United Kingdom | Information not reported | 1000 | 19 | 64  | Yes | Yes | Single 24-hour recall   | Nationally representative     |
| GDD 2010 | Low Income Diet and Health Survey, 2003-2005                      | 2003 | 2005 | United Kingdom | Information not reported | 1000 | 2  | 100 | Yes | Yes | Multiple 24-hour recall | Nationally representative     |
| GDD 2010 | TRANSFAIR study                                                   | 1996 | 1996 | United Kingdom | Information not reported | 1000 | 0  | 100 | Yes | Yes | Household availability/ | Nationally representative     |

|          |                                          |      |      |                |                                 |      |    |     |     |     |  | <i>budget survey</i>           |                                      |
|----------|------------------------------------------|------|------|----------------|---------------------------------|------|----|-----|-----|-----|--|--------------------------------|--------------------------------------|
| GDD 2010 | INTERSALT, Belfast                       | 1985 | 1987 | United Kingdom | <i>Information not reported</i> | 24   | 20 | 59  | Yes | Yes |  | <i>Biomarker</i>               | <i>Sub-nationally representative</i> |
| GDD 2010 | INTERSALT, Birmingham                    | 1985 | 1987 | United Kingdom | <i>Information not reported</i> | 25   | 20 | 59  | Yes | Yes |  | <i>Biomarker</i>               | <i>Sub-nationally representative</i> |
| GDD 2010 | INTERSALT, Bridgend, South-Wales         | 1985 | 1987 | United Kingdom | <i>Information not reported</i> | 25   | 20 | 59  | Yes | Yes |  | <i>Biomarker</i>               | <i>Sub-nationally representative</i> |
| GDD 2010 | Fogarty et al.                           | 1991 | 1991 | United Kingdom | <i>Information not reported</i> | 25   | 20 | 74  | Yes | Yes |  | <i>Biomarker</i>               | <i>Sub-nationally representative</i> |
| GDD 2010 | Khaw et al.                              | 1993 | 1997 | United Kingdom | <i>Information not reported</i> | 160  | 45 | 79  | Yes | Yes |  | <i>Biomarker</i>               | <i>Sub-nationally representative</i> |
| GDD 2010 | National Centre for Social Research      | 2008 | 2008 | United Kingdom | <i>Information not reported</i> | 85   | 20 | 64  | Yes | Yes |  | <i>Biomarker</i>               | <i>Nationally representative</i>     |
| GDD 2010 | National Centre for Social Research      | 2007 | 2007 | United Kingdom | <i>Information not reported</i> | 60   | 25 | 64  | Yes | Yes |  | <i>Biomarker</i>               | <i>Nationally representative</i>     |
| GDD 2010 | Bingham et al.                           | 1985 | 1985 | United Kingdom | <i>Information not reported</i> | 71   | 25 | 44  | Yes | Yes |  | <i>Biomarker</i>               | <i>Locally representative</i>        |
| GDD 2010 | National British Diet & Nutrition Survey | 2000 | 2001 | United Kingdom | <i>Information not reported</i> | 54   | 20 | 64  | Yes | Yes |  | <i>Biomarker</i>               | <i>Nationally representative</i>     |
| GDD 2010 | Scottish center for Social Research      | 2009 | 2009 | United Kingdom | <i>Information not reported</i> | 19   | 20 | 64  | Yes | Yes |  | <i>Biomarker</i>               | <i>Sub-nationally representative</i> |
| GDD 2010 | INTERMAP,Belfast                         | 1997 | 1998 | United Kingdom | <i>Information not reported</i> | 59   | 40 | 59  | Yes | Yes |  | <i>Biomarker</i>               | <i>Sub-nationally representative</i> |
| GDD 2010 | INTERMAP, West Bromwich                  | 1997 | 1998 | United Kingdom | <i>Information not reported</i> | 74   | 40 | 59  | Yes | Yes |  | <i>Biomarker</i>               | <i>Sub-nationally representative</i> |
| GDD 2010 | INTERMAP,Belfast                         | 1997 | 1998 | United Kingdom | <i>Information not reported</i> | 59   | 40 | 59  | Yes | Yes |  | <i>Single 24-hour recall</i>   | <i>Sub-nationally representative</i> |
| GDD 2010 | INTERMAP, West Bromwich                  | 1997 | 1998 | United Kingdom | <i>Information not reported</i> | 74   | 40 | 59  | Yes | Yes |  | <i>Single 24-hour recall</i>   | <i>Sub-nationally representative</i> |
| GDD 2010 | Khaw et al.                              | 1993 | 1997 | United Kingdom | <i>Information not reported</i> | 3423 | 45 | 79  | Yes | Yes |  | <i>Multiple 24-hour recall</i> | <i>Sub-nationally representative</i> |
| GDD 2017 | Feeding Infants and Toddlers Study 2008  | 2008 | 2009 | United States  | <i>Both urban and rural</i>     | 3273 | 0  | 4   | No  | No  |  | <i>Multiple 24-hour recall</i> | <i>Nationally representative</i>     |
| GDD 2017 | NHANES 2005-2006                         | 2005 | 2006 | United States  | <i>Both urban and rural</i>     | 9309 | 0  | 100 | Yes | Yes |  | <i>Multiple 24-hour recall</i> | <i>Nationally representative</i>     |
| GDD 2017 | NHANES 2007-2008                         | 2007 | 2008 | United States  | <i>Both urban and rural</i>     | 9221 | 0  | 100 | Yes | Yes |  | <i>Multiple 24-hour recall</i> | <i>Nationally representative</i>     |
| GDD 2017 | NHANES 2009-2010                         | 2009 | 2010 | United States  | <i>Both urban and rural</i>     | 9715 | 0  | 100 | Yes | Yes |  | <i>Multiple 24-hour recall</i> | <i>Nationally representative</i>     |
| GDD 2017 | NHANES 2011-2012                         | 2011 | 2012 | United States  | <i>Both urban and rural</i>     | 8476 | 0  | 100 | Yes | Yes |  | <i>Multiple 24-hour recall</i> | <i>Nationally representative</i>     |
| GDD 2017 | NHANES 2013-2014                         | 2013 | 2014 | United States  | <i>Both urban and rural</i>     | 8453 | 0  | 100 | Yes | Yes |  | <i>Multiple 24-hour recall</i> | <i>Nationally representative</i>     |



|          |                                                          |      |      |               |                                 |      |    |     |     |     |                                             |                                  |
|----------|----------------------------------------------------------|------|------|---------------|---------------------------------|------|----|-----|-----|-----|---------------------------------------------|----------------------------------|
| GDD 2017 | NHANES 2015-2016                                         | 2015 | 2016 | United States | <i>Both urban and rural</i>     | 8453 | 0  | 100 | Yes | Yes | <i>Multiple 24-hour recall</i>              | <i>Nationally representative</i> |
| GDD 2017 | Health Behavior in School-Aged Children 1998             | 1997 | 1998 | United States | <i>Both urban and rural</i>     | 5169 | 11 | 16  | Yes | Yes | <i>FFQ</i>                                  | <i>Nationally representative</i> |
| GDD 2017 | Health Behavior in School-Aged Children 2002             | 2001 | 2002 | United States | <i>Both urban and rural</i>     | 5025 | 11 | 16  | Yes | Yes | <i>FFQ</i>                                  | <i>Nationally representative</i> |
| GDD 2017 | Health Behavior in School-Aged Children 2006             | 2005 | 2006 | United States | <i>Both urban and rural</i>     | 3860 | 11 | 15  | Yes | Yes | <i>FFQ</i>                                  | <i>Nationally representative</i> |
| GDD 2017 | Health Behavior in School-Aged Children 2010             | 2009 | 2010 | United States | <i>Both urban and rural</i>     | 6107 | 11 | 15  | Yes | Yes | <i>FFQ</i>                                  | <i>Nationally representative</i> |
| GDD 2010 | Continuing Survey of Food Intakes by Individuals (CSFII) | 1989 | 1991 | United States | <i>Information not reported</i> | 1000 | 3  | 100 | Yes | Yes | <i>Single 24-hour recall</i>                | <i>Nationally representative</i> |
| GDD 2010 | World-wide consumption of trans fatty acids              | 1981 | 1981 | United States | <i>Information not reported</i> |      | 0  | 100 | Yes | Yes | <i>Household availability/budget survey</i> | <i>Nationally representative</i> |
| GDD 2010 | World-wide consumption of trans fatty acids              | 1984 | 1984 | United States | <i>Information not reported</i> |      | 0  | 100 | Yes | Yes | <i>Household availability/budget survey</i> | <i>Nationally representative</i> |
| GDD 2010 | World-wide consumption of trans fatty acids              | 1985 | 1985 | United States | <i>Information not reported</i> |      | 0  | 100 | Yes | Yes | <i>Single 24-hour recall</i>                | <i>Nationally representative</i> |
| GDD 2010 | World-wide consumption of trans fatty acids              | 1986 | 1986 | United States | <i>Information not reported</i> |      | 0  | 100 | Yes | Yes | <i>Household availability/budget survey</i> | <i>Nationally representative</i> |
| GDD 2010 | World-wide consumption of trans fatty acids              | 1990 | 1990 | United States | <i>Information not reported</i> |      | 0  | 100 | Yes | Yes | <i>Household availability/budget survey</i> | <i>Nationally representative</i> |
| GDD 2010 | World-wide consumption of trans fatty acids              | 1991 | 1991 | United States | <i>Information not reported</i> |      | 0  | 100 | Yes | Yes | <i>Household availability/budget survey</i> | <i>Nationally representative</i> |
| GDD 2010 | World-wide consumption of trans fatty acids              | 1992 | 1992 | United States | <i>Information not reported</i> |      | 0  | 100 | Yes | Yes | <i>Household availability/budget survey</i> | <i>Nationally representative</i> |

|          |                                                  |      |      |               |                          |      |    |     |     |     |                         |                               |
|----------|--------------------------------------------------|------|------|---------------|--------------------------|------|----|-----|-----|-----|-------------------------|-------------------------------|
| GDD 2010 | World-wide consumption of trans fatty acids      | 1992 | 1992 | United States | Information not reported |      | 0  | 100 | Yes | Yes | Single 24-hour recall   | Nationally representative     |
| GDD 2010 | World-wide consumption of trans fatty acids      | 1992 | 1992 | United States | Information not reported |      | 0  | 100 | Yes | Yes | Single 24-hour recall   | Nationally representative     |
| GDD 2010 | World-wide consumption of trans fatty acids      | 1993 | 1993 | United States | Information not reported |      | 0  | 100 | Yes | Yes | Single 24-hour recall   | Nationally representative     |
| GDD 2010 | World-wide consumption of trans fatty acids      | 1994 | 1994 | United States | Information not reported |      | 0  | 100 | Yes | Yes | Single 24-hour recall   | Nationally representative     |
| GDD 2010 | World-wide consumption of trans fatty acids      | 1995 | 1995 | United States | Information not reported |      | 0  | 100 | Yes | Yes | Single 24-hour recall   | Nationally representative     |
| GDD 2010 | World-wide consumption of trans fatty acids      | 1999 | 1999 | United States | Information not reported |      | 0  | 100 | Yes | Yes | Single 24-hour recall   | Nationally representative     |
| GDD 2010 | Continuing Survey of Food Intakes by Individuals | 1989 | 1989 | United States | Information not reported | 1000 | 0  | 100 | Yes | Yes | Multiple 24-hour recall | Nationally representative     |
| GDD 2010 | Continuing Survey of Food Intakes by Individuals | 1990 | 1990 | United States | Information not reported | 1000 | 0  | 100 | Yes | Yes | Multiple 24-hour recall | Nationally representative     |
| GDD 2010 | Continuing Survey of Food Intakes by Individuals | 1991 | 1991 | United States | Information not reported | 1000 | 0  | 100 | Yes | Yes | Multiple 24-hour recall | Nationally representative     |
| GDD 2010 | Continuing Survey of Food Intakes by Individuals | 1994 | 1994 | United States | Information not reported | 1000 | 0  | 100 | Yes | Yes | Multiple 24-hour recall | Nationally representative     |
| GDD 2010 | Continuing Survey of Food Intakes by Individuals | 1995 | 1995 | United States | Information not reported | 1000 | 0  | 100 | Yes | Yes | Multiple 24-hour recall | Nationally representative     |
| GDD 2010 | Continuing Survey of Food Intakes by Individuals | 1996 | 1996 | United States | Information not reported | 1000 | 0  | 100 | Yes | Yes | Multiple 24-hour recall | Nationally representative     |
| GDD 2010 | NHANES 1999-2000                                 | 1999 | 2000 | United States | Information not reported | 1000 | 0  | 100 | Yes | Yes | Single 24-hour recall   | Nationally representative     |
| GDD 2010 | NHANES 2001-2002                                 | 2001 | 2002 | United States | Information not reported | 1000 | 0  | 100 | Yes | Yes | Multiple 24-hour recall | Nationally representative     |
| GDD 2010 | NHANES 2003-2004                                 | 2003 | 2004 | United States | Information not reported | 1000 | 0  | 100 | Yes | Yes | Multiple 24-hour recall | Nationally representative     |
| GDD 2010 | Cooper et al.                                    | 1991 | 1994 | United States | Information not reported | 708  | 20 | 75  | Yes | Yes | Biomarker               | Sub-nationally representative |

|          |                                                 |      |      |               |                                 |     |    |    |     |     |                              |                                      |
|----------|-------------------------------------------------|------|------|---------------|---------------------------------|-----|----|----|-----|-----|------------------------------|--------------------------------------|
| GDD 2010 | INTERSALT, Chicago                              | 1985 | 1987 | United States | <i>Information not reported</i> | 22  | 20 | 59 | Yes | Yes | <i>Biomarker</i>             | <i>Sub-nationally representative</i> |
| GDD 2010 | INTERSALT, Goodman, Blacks                      | 1985 | 1987 | United States | <i>Information not reported</i> | 22  | 20 | 59 | Yes | Yes | <i>Biomarker</i>             | <i>Locally representative</i>        |
| GDD 2010 | INTERSALT, Goodman, Whites                      | 1985 | 1987 | United States | <i>Information not reported</i> | 24  | 20 | 59 | Yes | Yes | <i>Biomarker</i>             | <i>Locally representative</i>        |
| GDD 2010 | INTERSALT, Molokai, Hawaii                      | 1985 | 1987 | United States | <i>Information not reported</i> | 25  | 20 | 59 | Yes | Yes | <i>Biomarker</i>             | <i>Sub-nationally representative</i> |
| GDD 2010 | INTERSALT, Jackson, Blacks                      | 1985 | 1987 | United States | <i>Information not reported</i> | 25  | 20 | 59 | Yes | Yes | <i>Biomarker</i>             | <i>Locally representative</i>        |
| GDD 2010 | INTERSALT, Jackson, Whites                      | 1985 | 1987 | United States | <i>Information not reported</i> | 25  | 20 | 59 | Yes | Yes | <i>Biomarker</i>             | <i>Locally representative</i>        |
| GDD 2010 | INTERMAP, City of Woodlawn, Baltimore, Maryland | 1997 | 1998 | United States | <i>Information not reported</i> | 72  | 40 | 59 | Yes | Yes | <i>Biomarker</i>             | <i>Sub-nationally representative</i> |
| GDD 2010 | INTERMAP, Chicago                               | 1997 | 1998 | United States | <i>Information not reported</i> | 75  | 40 | 59 | Yes | Yes | <i>Biomarker</i>             | <i>Sub-nationally representative</i> |
| GDD 2010 | INTERMAP, Honolulu                              | 1997 | 1998 | United States | <i>Information not reported</i> | 67  | 40 | 59 | Yes | Yes | <i>Biomarker</i>             | <i>Locally representative</i>        |
| GDD 2010 | INTERMAP, Jackson                               | 1997 | 1998 | United States | <i>Information not reported</i> | 65  | 40 | 59 | Yes | Yes | <i>Biomarker</i>             | <i>Locally representative</i>        |
| GDD 2010 | INTERMAP, Minneapolis                           | 1997 | 1998 | United States | <i>Information not reported</i> | 65  | 40 | 59 | Yes | Yes | <i>Biomarker</i>             | <i>Sub-nationally representative</i> |
| GDD 2010 | INTERMAP, Pittsburgh                            | 1997 | 1998 | United States | <i>Information not reported</i> | 67  | 40 | 59 | Yes | Yes | <i>Biomarker</i>             | <i>Sub-nationally representative</i> |
| GDD 2010 | INTERMAP, Corpus Christi, Hispanic              | 1997 | 1998 | United States | <i>Information not reported</i> | 69  | 40 | 59 | Yes | Yes | <i>Biomarker</i>             | <i>Locally representative</i>        |
| GDD 2010 | INTERMAP, Corpus Christi, Non-Hispanic          | 1997 | 1998 | United States | <i>Information not reported</i> | 69  | 40 | 59 | Yes | Yes | <i>Biomarker</i>             | <i>Locally representative</i>        |
| GDD 2010 | Taylor et al. (1 of 2)                          | 1994 | 1999 | United States | <i>Information not reported</i> | 330 | 40 | 75 | No  | Yes | <i>Biomarker</i>             | <i>Locally representative</i>        |
| GDD 2010 | Taylor et al. (2 of 2)                          | 2005 | 2005 | United States | <i>Information not reported</i> | 146 | 40 | 75 | No  | Yes | <i>Biomarker</i>             | <i>Locally representative</i>        |
| GDD 2010 | Holbrook et al.                                 | 1981 | 1981 | United States | <i>Information not reported</i> | 12  | 20 | 53 | Yes | Yes | <i>Biomarker</i>             | <i>Locally representative</i>        |
| GDD 2010 | INTERMAP, City of Woodlawn, Baltimore, Maryland | 1997 | 1998 | United States | <i>Information not reported</i> | 72  | 40 | 59 | Yes | Yes | <i>Single 24-hour recall</i> | <i>Sub-nationally representative</i> |
| GDD 2010 | INTERMAP, Chicago                               | 1997 | 1998 | United States | <i>Information not reported</i> | 75  | 40 | 59 | Yes | Yes | <i>Single 24-hour recall</i> | <i>Sub-nationally representative</i> |
| GDD 2010 | INTERMAP, Honolulu                              | 1997 | 1998 | United States | <i>Information not reported</i> | 67  | 40 | 59 | Yes | Yes | <i>Single 24-hour recall</i> | <i>Locally representative</i>        |
| GDD 2010 | INTERMAP, Jackson                               | 1997 | 1998 | United States | <i>Information not reported</i> | 65  | 40 | 59 | Yes | Yes | <i>Single 24-hour recall</i> | <i>Locally representative</i>        |

|          |                                                                              |      |      |               |                                 |      |    |    |     |     |                                |                                      |
|----------|------------------------------------------------------------------------------|------|------|---------------|---------------------------------|------|----|----|-----|-----|--------------------------------|--------------------------------------|
| GDD 2010 | INTERMAP, Minneapolis                                                        | 1997 | 1998 | United States | <i>Information not reported</i> | 65   | 40 | 59 | Yes | Yes | <i>Single 24-hour recall</i>   | <i>Sub-nationally representative</i> |
| GDD 2010 | INTERMAP, Pittsburgh                                                         | 1997 | 1998 | United States | <i>Information not reported</i> | 67   | 40 | 59 | Yes | Yes | <i>Single 24-hour recall</i>   | <i>Sub-nationally representative</i> |
| GDD 2010 | INTERMAP, Corpus Christi, Hispanic                                           | 1997 | 1998 | United States | <i>Information not reported</i> | 69   | 40 | 59 | Yes | Yes | <i>Single 24-hour recall</i>   | <i>Locally representative</i>        |
| GDD 2010 | INTERMAP, Corpus Christi, Non-Hispanic                                       | 1997 | 1998 | United States | <i>Information not reported</i> | 69   | 40 | 59 | Yes | Yes | <i>Single 24-hour recall</i>   | <i>Locally representative</i>        |
| GDD 2010 | Holbrook et al.                                                              | 1981 | 1981 | United States | <i>Information not reported</i> | 12   | 20 | 53 | Yes | Yes | <i>Multiple 24-hour recall</i> | <i>Locally representative</i>        |
| GDD 2010 | Espeland et al.                                                              | 1992 | 1995 | United States | <i>Information not reported</i> | 325  | 60 | 79 | Yes | Yes | <i>Biomarker</i>               | <i>Sub-nationally representative</i> |
| GDD 2010 | Espeland et al.                                                              | 1992 | 1995 | United States | <i>Information not reported</i> | 325  | 60 | 79 | Yes | Yes | <i>Single 24-hour recall</i>   | <i>Sub-nationally representative</i> |
| GDD 2017 | Global Student Based Student Health Survey 2006                              | 2006 | 2006 | Uruguay       | <i>Both urban and rural</i>     | 3377 | 11 | 16 | Yes | Yes | <i>FFQ</i>                     | <i>Nationally representative</i>     |
| GDD 2017 | Global Student Based Student Health Survey 2012                              | 2012 | 2012 | Uruguay       | <i>Both urban and rural</i>     | 3466 | 11 | 16 | Yes | Yes | <i>FFQ</i>                     | <i>Nationally representative</i>     |
| GDD 2017 | World Health Survey 2003                                                     | 2003 | 2003 | Uruguay       | <i>Both urban and rural</i>     | 2986 | 18 | 93 | Yes | Yes | <i>FFQ</i>                     | <i>Nationally representative</i>     |
| GDD 2010 | Uruguay Global School-Based Student Health Survey (GSHS)-2006                | 2006 | 2006 | Uruguay       | <i>Information not reported</i> | 1000 | 25 | 64 | Yes | Yes | <i>FFQ</i>                     | <i>Nationally representative</i>     |
| GDD 2017 | Demographic and Health Survey Uzbekistan 1996                                | 1996 | 1996 | Uzbekistan    | <i>Both urban and rural</i>     | 5506 | 0  | 49 | Yes | Yes | <i>DHS questionnaire</i>       | <i>Nationally representative</i>     |
| GDD 2017 | Global Student Based Student Health Survey 2011                              | 2011 | 2011 | Vanuatu       | <i>Both urban and rural</i>     | 1088 | 11 | 16 | Yes | Yes | <i>FFQ</i>                     | <i>Nationally representative</i>     |
| GDD 2010 | STEP Vanuatu                                                                 | 2005 | 2005 | Vanuatu       | <i>Information not reported</i> | 1000 | 15 | 60 | Yes | Yes | <i>FFQ</i>                     | <i>Sub-nationally representative</i> |
| GDD 2017 | Nutritional status in pregnant women under privileged communities of Caracas | 1998 | 2000 | Venezuela     | <i>Only urban</i>               | 197  | 13 | 44 | No  | Yes | <i>Single 24-hour recall</i>   | <i>Locally representative</i>        |
| GDD 2017 | Global Student Based Student Health Survey 2003                              | 2003 | 2003 | Venezuela     | <i>Both urban and rural</i>     | 4294 | 11 | 16 | Yes | Yes | <i>FFQ</i>                     | <i>Nationally representative</i>     |

|          |                                                                                                        |      |      |                         |                          |       |    |    |     |     |                       |                               |
|----------|--------------------------------------------------------------------------------------------------------|------|------|-------------------------|--------------------------|-------|----|----|-----|-----|-----------------------|-------------------------------|
| GDD 2017 | Qualitative and quantitative assessment of nutritional status and lifestyles of Vietnamese adolescents | 2006 | 2006 | Viet Nam                | Both urban and rural     | 1172  | 15 | 19 | Yes | Yes | Single 24-hour recall | Sub-nationally representative |
| GDD 2017 | SEANUTS: South East Asian Nutrition Surveys                                                            | 2010 | 2011 | Viet Nam                | Both urban and rural     | 2861  | 0  | 11 | Yes | Yes | Single 24-hour recall | Nationally representative     |
| GDD 2017 | Global Student Based Student Health Survey 2013                                                        | 2013 | 2013 | Viet Nam                | Both urban and rural     | 3316  | 7  | 16 | Yes | Yes | FFQ                   | Nationally representative     |
| GDD 2017 | Demographic and Health Survey Vietnam 1997                                                             | 1997 | 1997 | Viet Nam                | Both urban and rural     | 1597  | 0  | 2  | Yes | Yes | DHS questionnaire     | Nationally representative     |
| GDD 2017 | World Health Survey 2003                                                                               | 2003 | 2003 | Viet Nam                | Both urban and rural     | 4174  | 18 | 95 | Yes | Yes | FFQ                   | Nationally representative     |
| GDD 2017 | Global Student Based Student Health Survey 2009                                                        | 2009 | 2009 | Virgin Islands, British | Both urban and rural     | 1646  | 11 | 16 | Yes | Yes | FFQ                   | Nationally representative     |
| GDD 2010 | The Virgin Islands (UK) STEPS Survey 2009                                                              | 2009 | 2009 | Virgin Islands, British | Information not reported | 1000  | 25 | 64 | Yes | Yes | FFQ                   | Nationally representative     |
| GDD 2017 | Global Student Based Student Health Survey 2008                                                        | 2008 | 2008 | Yemen                   | Both urban and rural     | 1051  | 11 | 16 | Yes | Yes | FFQ                   | Nationally representative     |
| GDD 2017 | Demographic and Health Survey Yemen 1991                                                               | 1991 | 1992 | Yemen                   | Both urban and rural     | 2114  | 0  | 4  | Yes | Yes | DHS questionnaire     | Nationally representative     |
| GDD 2017 | Demographic and Health Survey Yemen 2013                                                               | 2013 | 2013 | Yemen                   | Both urban and rural     | 22752 | 0  | 49 | Yes | Yes | DHS questionnaire     | Nationally representative     |
| GDD 2017 | Global Student Based Student Health Survey 2004                                                        | 2004 | 2004 | Zambia                  | Both urban and rural     | 2098  | 11 | 16 | Yes | Yes | FFQ                   | Nationally representative     |
| GDD 2017 | Demographic and Health Survey Zambia 1996                                                              | 1996 | 1997 | Zambia                  | Both urban and rural     | 4015  | 0  | 4  | Yes | Yes | DHS questionnaire     | Nationally representative     |
| GDD 2017 | World Health Survey 2003                                                                               | 2003 | 2003 | Zambia                  | Both urban and rural     | 3502  | 18 | 99 | Yes | Yes | FFQ                   | Nationally representative     |
| GDD 2017 | Demographic and Health Survey Zambia 2001                                                              | 2001 | 2002 | Zambia                  | Both urban and rural     | 5165  | 0  | 4  | Yes | Yes | DHS questionnaire     | Nationally representative     |
| GDD 2017 | Demographic and Health Survey Zambia 2007                                                              | 2007 | 2007 | Zambia                  | Both urban and rural     | 8220  | 0  | 49 | Yes | Yes | DHS questionnaire     | Nationally representative     |

|          |                                                 |      |      |          |                          |       |    |     |     |     |                   |                               |
|----------|-------------------------------------------------|------|------|----------|--------------------------|-------|----|-----|-----|-----|-------------------|-------------------------------|
| GDD 2017 | Demographic and Health Survey Zambia 2013       | 2013 | 2014 | Zambia   | Both urban and rural     | 7821  | 0  | 4   | Yes | Yes | DHS questionnaire | Nationally representative     |
| GDD 2017 | Demographic and Health Survey Zambia 1992       | 1992 | 1992 | Zambia   | Both urban and rural     | 2101  | 0  | 4   | Yes | Yes | DHS questionnaire | Nationally representative     |
| GDD 2010 | STEP Zambia                                     | 2008 | 2008 | Zambia   | Information not reported | 1000  | 25 | 100 | Yes | Yes | FFQ               | Sub-nationally representative |
| GDD 2017 | Demographic and Health Survey Zimbabwe 1994     | 1994 | 1994 | Zimbabwe | Both urban and rural     | 2019  | 0  | 2   | Yes | Yes | DHS questionnaire | Nationally representative     |
| GDD 2017 | World Health Survey 2003                        | 2003 | 2003 | Zimbabwe | Both urban and rural     | 4264  | 18 | 108 | Yes | Yes | FFQ               | Nationally representative     |
| GDD 2017 | Demographic and Health Survey Zimbabwe 1999     | 1999 | 1999 | Zimbabwe | Both urban and rural     | 3143  | 0  | 4   | Yes | Yes | DHS questionnaire | Nationally representative     |
| GDD 2017 | Demographic and Health Survey Zimbabwe 2006     | 2005 | 2006 | Zimbabwe | Both urban and rural     | 6286  | 0  | 49  | Yes | Yes | DHS questionnaire | Nationally representative     |
| GDD 2017 | Demographic and Health Survey Zimbabwe 2011     | 2010 | 2011 | Zimbabwe | Both urban and rural     | 19084 | 0  | 54  | Yes | Yes | DHS questionnaire | Nationally representative     |
| GDD 2017 | Demographic and Health Survey South Africa 1998 | 1988 | 1989 | Zimbabwe | Both urban and rural     | 2971  | 0  | 4   | Yes | Yes | DHS questionnaire | Nationally representative     |
| GDD 2017 | Demographic and Health Survey Zimbabwe 2015     | 2015 | 2015 | Zimbabwe | Both urban and rural     | 14447 | 0  | 49  | Yes | Yes | DHS questionnaire | Nationally representative     |
| GDD 2010 | INTERSALT, Harare                               | 1985 | 1987 | Zimbabwe | Information not reported | 25    | 20 | 59  | Yes | Yes | Biomarker         | Sub-nationally representative |

## References

1. Dodd H, Williams S, Brown R, Venn B. Calculating meal glycemic index by using measured and published food values compared with directly measured meal glycemic index. *Am J Clin Nutr*. 2011;94(4):992-996.
2. Khatibzadeh S, Saheb Kashaf M, Micha R, Fahimi S, Shi P, Elmadafa I, Kalantarian S, Wirojratana P, Ezzati M, Powles J, Mozaffarian D. A global database of food and nutrient consumption. *Bulletin of the World Health Organization*. 2016;94(12):931-934
3. US Department of Agriculture, Agricultural Research Service, Nutrient Data Laboratory. USDA National Nutrient Database for Standard Reference, Release 28. Version Current: September 2015, slightly revised May 2016.
4. Smith LC, Subandoro A. 2007. Measuring Food Security Using Household Expenditure Surveys. Food Security in Practice technical guide series. Washington, D.C.: International Food Policy Research Institute.
5. Willett W. *Nutritional Epidemiology. Chapter 11: "Implications for Total Energy Intake for Epidemiologic Analyses"*. New York: Oxford University Press; 1998.
6. U.S. Department of Health and Human Services and U.S. Department of Agriculture. 2015-2020 Dietary Guidelines for Americans. 2015. [https://health.gov/sites/default/files/2019-09/2015-2020\\_Dietary\\_Guidelines.pdf](https://health.gov/sites/default/files/2019-09/2015-2020_Dietary_Guidelines.pdf)
7. CDC. National Health and Nutrition Examination Survey. <https://www.n.cdc.gov/nchs/nhanes/default.aspx>
8. British Nutrition Foundation. Nutrition Requirements. 2019. [https://www.nutrition.org.uk/attachments/article/261/Nutrition%20Requirements\\_Revised%20August%202019.pdf](https://www.nutrition.org.uk/attachments/article/261/Nutrition%20Requirements_Revised%20August%202019.pdf)
9. National Institute of Nutrition. *Dietary Guidelines for Indians: A Manual*. Indian Council of Medical Research. 2011. <https://www.nin.res.in/downloads/DietaryGuidelinesforNINwebsite.pdf>
10. Del Gobbo LC, Khatibzadeh S, Imamura F, Micha R, Shi P, Smith M, Myers SS, Mozaffarian D. Assessing global dietary habits: a comparison of national estimates from the FAO and the Global Dietary Database. *The American Journal of Clinical Nutrition*. 2015;101(5):1038-1046.
11. USDA. ChooseMyPlate. 2020. <http://www.choosemyplate.gov>
12. Lim SS, Vos T, Flaxman AD, Danaei G, Shibuya K, Adair-Rohani H, et al. A comparative risk assessment of burden of disease and injury attributable to 67 risk factors and risk factor clusters in 21 regions, 1990-2010: a systematic analysis for the Global Burden of Disease Study. 2010. *Lancet* 2013;380:2224-60.
13. Dietary Guidelines Advisory Committee. 2010 dietary guidelines for Americans. 2010. [www.cnpp.usda.gov/DGAs2010-PolicyDocument.htm](http://www.cnpp.usda.gov/DGAs2010-PolicyDocument.htm)
14. World Health Organization. Guideline: sugars intake for adults and children. 2015. [http://apps.who.int/iris/bitstream/10665/149782/1/9789241549028\\_eng.pdf?ua=1](http://apps.who.int/iris/bitstream/10665/149782/1/9789241549028_eng.pdf?ua=1)
15. Joint FAO/WHO/UNU Expert Consultation. Protein and Amino Acid Requirements in Human Nutrition. 2002. [http://apps.who.int/iris/bitstream/10665/43411/1/WHO\\_TRS\\_935\\_eng.pdf](http://apps.who.int/iris/bitstream/10665/43411/1/WHO_TRS_935_eng.pdf)
15. EFSA Panel on Dietetic Products, Nutrition, and Allergies (NDA); Scientific Opinion on Dietary Reference Values for carbohydrates and dietary fibre. *EFSA Journal* 2010; 8( 3):1462 [77 pp.]. doi:10.2903/j.efsa.2010.1462.
16. EFSA Panel on Dietetic Products, Nutrition, and Allergies (NDA); Scientific Opinion on Dietary Reference Values for fats, including saturated fatty acids, polyunsaturated fatty acids, monounsaturated fatty acids, trans fatty acids, and cholesterol. *EFSA Journal* 2010; 8( 3):1461. [107 pp.]. doi:10.2903/j.efsa.2010.1461.
17. FAO. Fats and fatty acids in human nutrition. Report of an expert consultation. 2010. [https://www.who.int/nutrition/publications/nutrientrequirements/fatsandfattyacids\\_humannutrition/en/](https://www.who.int/nutrition/publications/nutrientrequirements/fatsandfattyacids_humannutrition/en/)
18. EFSA Scientific Committee on Food and Scientific Panel on Dietetic Products, Nutrition, and Allergies (NDA). Tolerable upper intake levels for vitamins and minerals. 2006. <http://www.efsa.europa.eu/sites/default/files/assets/ndatolerableuil.pdf>
19. Mayo Clinic. Potassium supplement (oral route, parenteral route). 2020. <https://www.mayoclinic.org/drugs-supplements/potassium-supplement-oral-route-parenteral-route/description/drg-20070753>
20. NIH. Calcium fact sheet for health professionals. 2020. <https://ods.od.nih.gov/factsheets/Calcium-HealthProfessional/#h2>
21. NIH. Iron fact sheet for health professionals. 2020. <https://ods.od.nih.gov/factsheets/Iron-HealthProfessional/>
22. Joint FAO/WHO Expert Consultation on Human Vitamin and Mineral Requirements. 1998. <http://apps.who.int/iris/bitstream/10665/42716/1/9241546123.pdf>
23. NIH. Zinc fact sheet for health professionals. 2020. <https://ods.od.nih.gov/factsheets/Zinc-HealthProfessional/#h2>
24. NIH. Magnesium fact sheet for health professionals. 2020. <https://ods.od.nih.gov/factsheets/Magnesium-HealthProfessional/>
25. NIH. Iodine <https://ods.od.nih.gov/factsheets/Iodine-HealthProfessional/>
26. NIH. Vitamin A fact sheet for health professionals. 2020. <https://ods.od.nih.gov/factsheets/VitaminA-HealthProfessional/>
27. NIH. Vitamin D fact sheet for health professionals. 2020. <https://ods.od.nih.gov/factsheets/VitaminD-HealthProfessional/>
28. NIH. Vitamin E fact sheet for health professionals. 2020. <https://ods.od.nih.gov/factsheets/VitaminE-HealthProfessional/#h2>
29. NIH. Vitamin C fact sheet for health professionals. 2020. <https://ods.od.nih.gov/factsheets/VitaminC-HealthProfessional/>
30. NIH. Thiamine fact sheet for health professionals. 2020. <https://ods.od.nih.gov/factsheets/Thiamin-HealthProfessional/>
31. NIH. Riboflavin fact sheet for health professionals. 2020. <https://ods.od.nih.gov/factsheets/Riboflavin-HealthProfessional/>
32. U.S. National Library of Medicine. Niacin. 2019. <https://www.nlm.nih.gov/medlineplus/ency/article/002409.htm>
33. NIH. Vitamin B6 fact sheet for health professionals. 2020. <https://ods.od.nih.gov/factsheets/VitaminB6-HealthProfessional/>
34. NIH. Folate fact sheet for health professionals. 2020. <https://ods.od.nih.gov/factsheets/Folate-HealthProfessional/>
